# Supplementary material for: The Arabidopsis PHD-finger protein EDM2 has multiple roles in balancing NLR immune receptor gene expression
Source: PLoS Genet. 2020 Sep 14;16(9):e1008993. doi: 10.1371/journal.pgen.1008993 (PMC7529245; doi:10.1371/journal.pgen.1008993)
Supplement: S8 Table — (XLSX) [file pgen.1008993.s028.xlsx]

## Sheet: S8 Table
S8 Table. List of TEs that show significant H3K9me2 changes in ibm1-4 identified by ChIP-seq
geneID	baseMean	log2FoldChange	lfcSE	stat	pval	padj	length
AT4TE31000	41.656	2.81103	0.411871	6.82504	8.79035e-12	1.50571e-10	169
AT2TE29070	108.895	2.70155	0.276882	9.75706	1.72079e-22	5.7142e-21	628
AT4TE07125	133.765	2.69114	0.246744	10.9066	1.07153e-27	4.50414e-26	713
AT1TE05870	50.8683	2.64719	0.366302	7.22678	4.9459e-13	9.33116e-12	172
AT1TE84620	47.7326	2.50136	0.374388	6.68122	2.36968e-11	3.92971e-10	390
AT4TE67490	524.186	2.45123	0.135791	18.0515	7.67748e-73	1.59405e-70	5005
AT3TE32910	49.8699	2.43502	0.362955	6.70886	1.96151e-11	3.27258e-10	322
AT5TE81425	579.6	2.38322	0.131769	18.0863	4.08367e-73	8.5218e-71	5325
AT5TE28960	45.3698	2.36686	0.373806	6.3318	2.42318e-10	3.71013e-09	300
AT5TE35515	54.649	2.33899	0.345768	6.76461	1.33669e-11	2.25859e-10	387
AT5TE25430	65.9174	2.29852	0.318387	7.21929	5.22591e-13	9.83237e-12	338
AT1TE94280	56.2354	2.26429	0.342477	6.61151	3.80411e-11	6.22311e-10	424
AT3TE18035	59.1719	2.25123	0.33165	6.78797	1.1372e-11	1.93103e-10	124
AT5TE65640	480.615	2.08069	0.141139	14.7421	3.4584e-49	3.34529e-47	4571
AT1TE56445	637.356	2.00584	0.123892	16.1902	5.91083e-59	7.66543e-57	5115
AT1TE65385	54.1737	1.91553	0.340109	5.63211	1.78017e-08	2.27064e-07	448
AT3TE21460	54.7901	1.88582	0.332825	5.66611	1.46077e-08	1.87781e-07	461
AT5TE46635	383.705	1.87658	0.151671	12.3727	3.67324e-35	2.09827e-33	3412
AT2TE46175	148.145	1.85405	0.219266	8.45571	2.77399e-17	6.93666e-16	1034
AT1TE88160	42.0131	1.73114	0.367505	4.71053	2.47071e-06	2.38597e-05	461
AT1TE94285	87.5029	1.73087	0.275142	6.29084	3.15761e-10	4.78647e-09	939
AT2TE12510	503.946	1.69492	0.130504	12.9876	1.43936e-38	9.31846e-37	5613
AT3TE51210	180.031	1.66626	0.196971	8.45942	2.68715e-17	6.73179e-16	1431
AT3TE91850	95.747	1.63945	0.263116	6.2309	4.63769e-10	6.92034e-09	1235
AT1TE98440	236.054	1.62769	0.186354	8.73443	2.44886e-18	6.52026e-17	3426
AT5TE81110	44.7401	1.62605	0.356037	4.56707	4.94582e-06	4.55676e-05	667
AT2TE57160	202.562	1.62115	0.197621	8.20331	2.33865e-16	5.51589e-15	2264
AT1TE91365	43.7415	1.59213	0.364846	4.36383	1.27804e-05	0.000110704	507
AT4TE60280	60.7728	1.51377	0.312897	4.83791	1.31209e-06	1.31818e-05	405
AT3TE71210	77.4545	1.50884	0.286336	5.26949	1.36804e-07	1.57536e-06	958
AT5TE55265	110.572	1.50516	0.242797	6.19925	5.67315e-10	8.39235e-09	1433
AT3TE09220	222.821	1.49142	0.176696	8.44058	3.15766e-17	7.84834e-16	3143
AT3TE18040	4362.72	1.43368	0.0811922	17.6578	8.85513e-70	1.60368e-67	11981
AT3TE18045	586.09	1.39322	0.126342	11.0274	2.81894e-28	1.20339e-26	2113
AT2TE07175	326.682	1.3883	0.148739	9.33377	1.02171e-20	3.1136e-19	4985
AT3TE05245	216.946	1.38017	0.177539	7.77389	7.61111e-15	1.61702e-13	3726
AT2TE20990	89.0814	1.36554	0.262902	5.19411	2.05703e-07	2.3162e-06	876
AT4TE63170	43.3451	1.35521	0.372799	3.63524	0.00027772	0.00184742	526
AT4TE56270	183.862	1.33944	0.190648	7.02573	2.12953e-12	3.81294e-11	2152
AT1TE36605	88.8368	1.30399	0.268937	4.84869	1.24279e-06	1.25346e-05	1622
AT1TE41280	113.723	1.30374	0.236649	5.50916	3.60553e-08	4.4365e-07	1525
AT4TE22885	46.7893	1.3034	0.345136	3.77647	0.000159065	0.00111419	493
AT5TE71450	180.462	1.27542	0.195452	6.52548	6.77832e-11	1.08596e-09	2868
AT1TE70550	38.809	1.26872	0.372504	3.40593	0.000659382	0.00400757	460
AT5TE29800	106.922	1.23525	0.254931	4.84544	1.26333e-06	1.27261e-05	1821
AT5TE54905	322.446	1.19432	0.148867	8.02274	1.03408e-15	2.34609e-14	5243
AT3TE18050	68.7699	1.18632	0.291329	4.07211	4.65898e-05	0.000365377	125
AT3TE64400	181.793	1.13107	0.194078	5.82789	5.61314e-09	7.5263e-08	2168
AT1TE39460	44.4832	1.11656	0.350535	3.1853	0.00144605	0.00803663	474
AT1TE70875	104.264	1.11523	0.24467	4.55809	5.16211e-06	4.74116e-05	965
AT2TE07880	74.3651	1.10609	0.283503	3.9015	9.55999e-05	0.000704069	699
AT2TE45280	122.581	1.1054	0.248365	4.45069	8.55963e-06	7.63145e-05	2494
AT1TE57805	211.921	1.10202	0.178898	6.16008	7.27103e-10	1.06678e-08	3705
AT3TE20930	172.458	1.095	0.195584	5.59862	2.16071e-08	2.73145e-07	3114
AT4TE42860	1577.99	1.08756	0.0871527	12.4788	9.74817e-36	5.65229e-34	4752
AT3TE34225	684.013	1.08222	0.113372	9.54575	1.35132e-21	4.29976e-20	14726
AT2TE20870	786.471	1.07319	0.10408	10.3113	6.26746e-25	2.30667e-23	4571
AT3TE83365	137.039	1.00148	0.224203	4.46683	7.93889e-06	7.12283e-05	1437
AT5TE15670	85.9925	0.992746	0.265056	3.74542	0.00018009	0.00124806	1445
AT3TE44935	85.5378	0.992648	0.268409	3.69827	0.000217074	0.00148115	196
AT3TE63765	314.584	0.989929	0.153353	6.45522	1.08064e-10	1.70866e-09	4966
AT5TE72140	129.986	0.956419	0.219957	4.3482	1.37259e-05	0.000118049	884
AT4TE33435	104.805	0.882268	0.242555	3.6374	0.000275409	0.00183324	1718
AT4TE24880	748.099	0.868463	0.106574	8.14895	3.6711e-16	8.51686e-15	2738
AT3TE43175	81.9878	0.866749	0.270353	3.20599	0.001346	0.00753973	1593
AT2TE15350	55.2628	0.858345	0.319598	2.6857	0.00723782	0.0325365	173
AT4TE24760	754.613	0.846054	0.105953	7.98518	1.40314e-15	3.1572e-14	2711
AT4TE14300	68.6612	0.845496	0.289928	2.91623	0.00354286	0.0175435	84
AT4TE18750	75.3386	0.835029	0.282671	2.95407	0.00313615	0.0158076	63
AT4TE12740	72.4166	0.81825	0.293201	2.79075	0.00525865	0.0247447	157
AT2TE31290	214.66	0.811925	0.178258	4.55478	5.24406e-06	4.80891e-05	4017
AT4TE21115	476.443	0.810753	0.127127	6.3775	1.79998e-10	2.79235e-09	2714
AT2TE16640	60.171	0.807507	0.316307	2.55292	0.0106824	0.0452222	52
AT5TE34780	82.9134	0.803654	0.271463	2.96046	0.00307185	0.0155082	870
AT1TE78475	107.367	0.802635	0.239452	3.35196	0.000802414	0.00477453	2363
AT2TE11075	65.2408	0.800585	0.301367	2.65651	0.00789543	0.0350899	741
AT2TE23870	316.537	0.788616	0.152942	5.1563	2.51876e-07	2.79703e-06	4705
AT3TE07330	143.998	0.77515	0.209064	3.70771	0.00020914	0.00143153	3372
AT5TE44595	119.584	0.757492	0.246846	3.06868	0.00215005	0.0113697	1736
AT2TE15045	223.964	0.755092	0.17202	4.38956	1.13582e-05	9.92637e-05	972
AT4TE15395	81.0453	0.737349	0.269273	2.73829	0.00617593	0.0284028	99
AT4TE13475	90.9249	0.736846	0.255193	2.88741	0.00388426	0.0190438	123
AT2TE14290	93.3525	0.731533	0.255369	2.8646	0.0041753	0.0202868	113
AT4TE24680	746.997	0.721568	0.108954	6.62269	3.52719e-11	5.79085e-10	2711
AT2TE14250	117.221	0.696058	0.231746	3.00354	0.00266861	0.0137356	107
AT5TE61255	93.1116	0.685749	0.254871	2.69057	0.00713302	0.0321569	445
AT5TE19520	97.6328	0.677735	0.251313	2.69677	0.00700152	0.0316326	2377
AT2TE32125	88.1984	0.675625	0.259363	2.60494	0.009189	0.0398944	81
AT2TE14310	115.672	0.660619	0.245828	2.68732	0.00720281	0.0324217	219
AT1TE71950	1843.77	0.64849	0.0831294	7.80097	6.14322e-15	1.31879e-13	4813
AT2TE14555	524.444	0.642741	0.135707	4.73625	2.17714e-06	2.12091e-05	1090
AT1TE72060	1886.31	0.642603	0.0851991	7.54237	4.61497e-14	9.3082e-13	4813
AT4TE49270	451.317	0.642133	0.127555	5.03416	4.79951e-07	5.14627e-06	1161
AT4TE17110	398.91	0.636854	0.148463	4.28966	1.7895e-05	0.00015106	1008
AT4TE06710	870.323	0.631186	0.102088	6.18275	6.29941e-10	9.2887e-09	4826
AT5TE37690	310.473	0.630271	0.148676	4.23922	2.24301e-05	0.000185758	2746
AT4TE17105	206.692	0.626737	0.178241	3.51623	0.000437719	0.00279029	328
AT4TE16980	1084.92	0.618895	0.0939062	6.59056	4.38169e-11	7.12827e-10	2779
AT4TE15790	128.042	0.617961	0.222286	2.78002	0.00543548	0.0254618	311
AT4TE16075	160.974	0.608279	0.197677	3.07713	0.00209007	0.0111069	485
AT2TE00025	268.215	0.607119	0.159255	3.81223	0.000137716	0.000980008	1126
AT2TE32120	2974.56	0.598887	0.070783	8.46089	2.65355e-17	6.65573e-16	4926
AT5TE65710	428.775	0.592553	0.142496	4.15837	3.20523e-05	0.00025908	1828
AT5TE37660	325.263	0.585361	0.148487	3.94218	8.07442e-05	0.000604736	790
AT2TE08235	211.856	0.580689	0.178086	3.26073	0.00111127	0.0063574	1475
AT2TE14540	215.456	0.575413	0.174847	3.29095	0.000998503	0.00578555	383
AT4TE19195	499.955	0.573026	0.125753	4.55677	5.1947e-06	4.7679e-05	1411
AT4TE17080	532.196	0.566489	0.120392	4.70539	2.5338e-06	2.44117e-05	1276
AT5TE37665	865.518	0.561593	0.10164	5.52532	3.28891e-08	4.06149e-07	2093
AT2TE14370	156.645	0.561587	0.202814	2.76898	0.00562324	0.0262218	272
AT4TE25100	3018.11	0.555018	0.0724587	7.65978	1.86251e-14	3.85733e-13	5208
AT4TE14310	178.266	0.55355	0.191034	2.89765	0.00375966	0.0184902	588
AT2TE14495	223.939	0.550539	0.178214	3.0892	0.00200694	0.0107275	289
AT2TE15155	165.243	0.547021	0.19559	2.79677	0.00516159	0.0243424	981
AT2TE18825	599.396	0.537362	0.117436	4.57581	4.74391e-06	4.37963e-05	1369
AT4TE17090	730.896	0.533086	0.110601	4.81992	1.43613e-06	1.43543e-05	1741
AT4TE19200	187.088	0.528802	0.193918	2.72693	0.00639258	0.0292878	504
AT2TE17870	2148.91	0.527244	0.0821873	6.41515	1.40682e-10	2.2007e-09	5769
AT4TE15435	191.741	0.526986	0.190544	2.76569	0.00568022	0.0264365	523
AT4TE15000	305.92	0.52541	0.155237	3.38457	0.000712888	0.00430161	852
AT2TE54360	2005.02	0.5219	0.0800623	6.51867	7.09328e-11	1.13421e-09	5014
AT2TE00020	221.565	0.51996	0.189474	2.74423	0.00606523	0.0279813	889
AT4TE17100	1116.75	0.516046	0.101479	5.08523	3.67176e-07	4.00387e-06	2784
AT2TE14255	824.603	0.512463	0.10628	4.82183	1.42249e-06	1.42249e-05	1295
AT2TE14490	211.037	0.51239	0.184826	2.77228	0.00556659	0.0259871	300
AT4TE15405	963.733	0.509194	0.0990065	5.14304	2.70327e-07	2.99223e-06	2450
AT4TE16440	210.891	0.504951	0.179402	2.81463	0.00488329	0.0232271	694
AT4TE15020	190.085	0.502225	0.184813	2.71748	0.00657812	0.0300041	417
AT2TE15500	543.256	0.498637	0.118286	4.21553	2.49192e-05	0.000204845	1821
AT4TE13990	463.115	0.497748	0.128352	3.87799	0.000105323	0.000766614	1169
AT4TE16395	1817.82	0.497432	0.0856305	5.80906	6.28261e-09	8.38565e-08	4144
AT3TE66885	573.481	0.495517	0.119315	4.15302	3.2812e-05	0.000264802	1053
AT4TE15010	544.969	0.494651	0.123722	3.99807	6.38603e-05	0.0004887	1481
AT4TE12355	3343.32	0.49416	0.0689477	7.16717	7.65656e-13	1.4249e-11	5480
AT2TE12810	954.617	0.493991	0.10191	4.84733	1.25136e-06	1.26149e-05	2583
AT2TE14285	687.577	0.490162	0.112543	4.35534	1.32858e-05	0.000114671	1401
AT4TE15380	746.603	0.489956	0.10896	4.49664	6.90358e-06	6.24986e-05	2315
AT5TE46165	2089.48	0.489663	0.0769581	6.36272	1.98206e-10	3.06325e-09	3537
AT4TE14995	266.309	0.488597	0.158617	3.08035	0.0020676	0.0110131	586
AT2TE00010	1081.68	0.485354	0.0951271	5.10216	3.35792e-07	3.67628e-06	2545
AT2TE17380	2113.49	0.484259	0.0893633	5.41899	5.99367e-08	7.21311e-07	4748
AT4TE15520	353.952	0.478909	0.154285	3.10405	0.00190891	0.0102676	1025
AT4TE15785	379.864	0.477923	0.144184	3.31467	0.000917504	0.00537225	989
AT4TE14325	519.341	0.474299	0.126547	3.74802	0.000178238	0.00123752	1254
AT2TE16815	886.95	0.474286	0.103878	4.56579	4.97614e-06	4.58161e-05	2243
AT4TE13295	347.353	0.470494	0.152222	3.09085	0.00199586	0.0106724	806
AT4TE14535	346.375	0.470109	0.153657	3.05948	0.00221724	0.0116875	640
AT2TE19555	1892.54	0.46912	0.0850991	5.51264	3.53496e-08	4.35487e-07	4146
AT2TE16470	567.264	0.468963	0.120099	3.90482	9.4297e-05	0.000695844	1624
AT4TE14215	635.202	0.468935	0.119103	3.93723	8.2427e-05	0.000616777	1614
AT2TE16605	1766.04	0.466975	0.0835852	5.58681	2.31275e-08	2.9129e-07	4364
AT4TE14990	948.768	0.466726	0.0982503	4.75038	2.03036e-06	1.98734e-05	2269
AT4TE15045	285.913	0.466488	0.15776	2.95694	0.00310711	0.0156766	929
AT4TE14565	486.13	0.466406	0.126005	3.70148	0.000214345	0.0014652	1192
AT4TE15460	203.109	0.465908	0.181895	2.56141	0.0104249	0.0442874	580
AT4TE13485	1041.58	0.464863	0.096139	4.83532	1.32929e-06	1.33481e-05	2272
AT4TE16060	1778.92	0.46477	0.0822681	5.64945	1.60961e-08	2.06012e-07	5265
AT4TE15015	1310.4	0.463422	0.0906142	5.11422	3.15032e-07	3.46144e-06	3436
AT2TE27390	3828.76	0.46156	0.0666783	6.92219	4.447e-12	7.796e-11	5852
AT4TE14460	868.497	0.461415	0.101101	4.56388	5.02176e-06	4.61845e-05	2814
AT3TE55415	419.621	0.461252	0.133086	3.46583	0.0005286	0.00329953	614
AT4TE15810	538.083	0.461199	0.121597	3.79286	0.000148919	0.00104974	1622
AT2TE16880	222.937	0.458799	0.175823	2.60944	0.00906905	0.0394638	463
AT4TE15675	240.181	0.458654	0.166501	2.75466	0.00587524	0.027224	800
AT5TE43230	281.088	0.456296	0.16022	2.84793	0.00440048	0.0212179	454
AT3TE55475	882.815	0.455464	0.102168	4.45801	8.27241e-06	7.39218e-05	2889
AT4TE17175	1730.28	0.455334	0.0884996	5.14504	2.67464e-07	2.96213e-06	4223
AT4TE14285	753.219	0.454577	0.104634	4.34444	1.39629e-05	0.000119911	2147
AT2TE13430	329.607	0.453461	0.150267	3.0177	0.00254703	0.0131974	1223
AT4TE15800	984.721	0.452714	0.0960568	4.71298	2.44123e-06	2.36027e-05	2277
AT4TE14030	386.281	0.452074	0.154181	2.9321	0.00336674	0.0168051	882
AT2TE15510	394.529	0.452049	0.137797	3.28053	0.00103611	0.00597481	1761
AT2TE00095	531.718	0.451093	0.125174	3.60373	0.000313688	0.00206101	6037
AT4TE13515	779.097	0.449342	0.113043	3.97497	7.03891e-05	0.000533499	2027
AT2TE16550	209.327	0.449193	0.176	2.55224	0.0107034	0.0453017	621
AT4TE15500	411.019	0.448879	0.134595	3.33504	0.000852881	0.00504053	1456
AT5TE07650	321.619	0.448379	0.156093	2.87252	0.00407218	0.0198538	1588
AT2TE14320	319.48	0.447345	0.146778	3.04777	0.00230543	0.0121011	753
AT2TE15440	1000.47	0.446728	0.11402	3.91797	8.92988e-05	0.000663367	3371
AT4TE50995	939.681	0.445921	0.096372	4.62708	3.70861e-06	3.47401e-05	2665
AT4TE19890	264.092	0.445714	0.15986	2.78815	0.00530107	0.0249145	567
AT2TE17845	249.344	0.444892	0.164054	2.71186	0.0066907	0.0304374	1697
AT1TE57530	2259.72	0.444627	0.0799625	5.56045	2.69087e-08	3.36338e-07	5184
AT4TE14295	4691.41	0.440875	0.0679153	6.49154	8.49653e-11	1.34966e-09	10868
AT4TE13465	2425.83	0.439985	0.0803212	5.47782	4.30598e-08	5.26528e-07	6074
AT3TE57345	1123.51	0.439007	0.0909064	4.82922	1.37066e-06	1.37467e-05	2624
AT4TE17150	867.17	0.438438	0.110838	3.95568	7.63178e-05	0.000574831	2410
AT4TE17065	386.755	0.438061	0.136914	3.19953	0.0013765	0.00769489	1272
AT5TE00480	2264.91	0.437671	0.079008	5.53957	3.03208e-08	3.76242e-07	5456
AT4TE13470	350.947	0.435296	0.142699	3.05045	0.00228496	0.0120013	883
AT4TE15805	1575.21	0.434898	0.0896274	4.85229	1.22044e-06	1.23244e-05	3812
AT2TE16560	1378.67	0.434586	0.0909653	4.77749	1.77496e-06	1.74775e-05	3627
AT4TE16110	1543.64	0.434496	0.0880611	4.93403	8.05492e-07	8.35574e-06	4860
AT2TE18915	478.834	0.433933	0.12479	3.4773	0.000506483	0.00317692	1476
AT4TE15745	368.605	0.433402	0.154363	2.80769	0.00498987	0.0236547	1332
AT2TE16595	1251.24	0.433383	0.0890586	4.86626	1.13727e-06	1.15298e-05	3435
AT2TE54780	397.747	0.432522	0.134609	3.21317	0.00131278	0.0073687	2376
AT2TE00075	2465.43	0.427706	0.0780455	5.48021	4.24815e-08	5.1992e-07	7667
AT4TE17115	594.275	0.427584	0.120053	3.56162	0.000368579	0.00238845	1612
AT3TE56040	855.331	0.427447	0.108764	3.93004	8.49309e-05	0.000634018	2889
AT4TE15945	4280.96	0.424401	0.0712632	5.9554	2.59429e-09	3.59701e-08	9892
AT4TE15420	4312.69	0.424249	0.0784786	5.40591	6.4479e-08	7.71234e-07	12750
AT2TE10905	312.673	0.421204	0.15307	2.75171	0.00592847	0.0274459	1794
AT4TE15005	9202.81	0.417853	0.0669139	6.24464	4.24784e-10	6.35938e-09	22131
AT4TE15130	1817.59	0.416965	0.0845561	4.93123	8.17136e-07	8.47438e-06	4641
AT3TE55345	1134.83	0.416222	0.101146	4.11506	3.87072e-05	0.000308084	2341
AT5TE38370	507.714	0.416043	0.127629	3.25979	0.00111494	0.00637309	1185
AT2TE14330	857.043	0.415968	0.0996119	4.17589	2.96829e-05	0.000241445	2350
AT3TE48230	379.782	0.415637	0.147948	2.80935	0.00496419	0.0235438	1206
AT2TE18400	659.791	0.414991	0.114208	3.63363	0.000279462	0.00185751	1513
AT2TE08225	3031.57	0.414918	0.0742252	5.58998	2.27089e-08	2.86369e-07	5245
AT1TE66380	2422.02	0.413895	0.0769674	5.37753	7.55136e-08	8.96179e-07	4964
AT3TE56730	1909.66	0.413187	0.0866416	4.76893	1.85211e-06	1.81936e-05	3881
AT4TE15950	3139.77	0.411932	0.0715987	5.75334	8.74976e-09	1.15105e-07	8499
AT5TE46085	316.443	0.409993	0.148684	2.75748	0.00582488	0.027018	831
AT2TE15695	398.005	0.409764	0.143092	2.86363	0.00418813	0.0203371	1364
AT4TE18740	1755.62	0.407705	0.0863119	4.72362	2.31681e-06	2.24844e-05	3499
AT4TE19330	764.456	0.407067	0.104285	3.90339	9.4853e-05	0.000699571	2296
AT2TE16885	1051.82	0.407032	0.0976032	4.17027	3.04233e-05	0.000246979	2370
AT4TE16165	3290.9	0.406098	0.0733834	5.53392	3.13155e-08	3.87649e-07	8188
AT4TE15750	1812.5	0.40526	0.0806133	5.02722	4.97652e-07	5.32772e-06	5922
AT2TE17305	993.845	0.403861	0.0950085	4.25079	2.13021e-05	0.000177237	2605
AT4TE15740	468.91	0.403678	0.132532	3.04589	0.00231991	0.0121647	1631
AT2TE00110	1856.49	0.402945	0.0911522	4.42057	9.84404e-06	8.6843e-05	5323
AT4TE13505	3831.98	0.402457	0.0698742	5.75974	8.42431e-09	1.11072e-07	9186
AT4TE15955	1210.58	0.401907	0.0945196	4.2521	2.11776e-05	0.000176344	4384
AT3TE57110	1884.7	0.400539	0.0825663	4.85112	1.22769e-06	1.23914e-05	3610
AT4TE19025	1012.44	0.399279	0.0965419	4.13581	3.53711e-05	0.000283406	2525
AT5TE46155	457.735	0.398992	0.132339	3.01492	0.00257047	0.0133055	1387
AT4TE19180	1214.31	0.398366	0.0955213	4.17044	3.04007e-05	0.000246844	2073
AT4TE15175	614.883	0.396583	0.124941	3.17417	0.00150266	0.00831196	2781
AT4TE15025	5542.55	0.395425	0.0712553	5.5494	2.86645e-08	3.56874e-07	11593
AT4TE15030	5296.34	0.393389	0.0723708	5.43574	5.45683e-08	6.59989e-07	10801
AT4TE15670	4114.21	0.393353	0.07263	5.41585	6.09997e-08	7.31961e-07	13567
AT4TE15990	1463.9	0.393166	0.0869428	4.52212	6.12225e-06	5.57814e-05	3852
AT3TE42270	442.383	0.392576	0.129341	3.03519	0.00240383	0.0125408	1763
AT5TE46335	365.096	0.390206	0.140948	2.76843	0.00563263	0.0262477	1057
AT2TE16910	1212.17	0.390195	0.0907086	4.30163	1.69549e-05	0.000143685	3706
AT4TE15440	1411.04	0.389294	0.0945257	4.1184	3.81518e-05	0.000304312	4824
AT2TE16475	1095.39	0.389194	0.0951121	4.09195	4.27765e-05	0.000337792	4246
AT4TE19905	2115.89	0.388358	0.0825141	4.70656	2.51931e-06	2.42835e-05	4143
AT4TE15400	491.314	0.388145	0.123438	3.14446	0.00166391	0.00908895	1278
AT3TE51820	1183.52	0.387541	0.0948623	4.0853	4.40194e-05	0.000346474	2075
AT4TE18605	1228.33	0.387379	0.093442	4.14567	3.38827e-05	0.000272587	3214
AT4TE17070	1454.55	0.386867	0.085203	4.54053	5.61125e-06	5.13417e-05	3758
AT2TE16190	2973.66	0.386687	0.0752741	5.13705	2.79078e-07	3.08329e-06	9222
AT4TE17120	1090.87	0.385525	0.0965335	3.9937	6.50512e-05	0.000496889	2813
AT4TE18905	1101.75	0.383798	0.0945316	4.06	4.90733e-05	0.0003831	2709
AT4TE15475	2148.15	0.3835	0.0823071	4.65938	3.1717e-06	3.00435e-05	6422
AT5TE40465	1099.8	0.383477	0.0960348	3.99311	6.52133e-05	0.000497849	1474
AT1TE22850	2905.93	0.38293	0.135051	2.83545	0.00457606	0.0219538	5069
AT4TE13850	1605.72	0.3827	0.0883691	4.33071	1.48632e-05	0.000126927	4025
AT2TE13380	1403.7	0.382426	0.0909026	4.20698	2.58804e-05	0.000212237	4391
AT4TE16100	527.18	0.381391	0.120259	3.1714	0.00151706	0.0083848	1856
AT4TE16430	1058.99	0.381161	0.0937726	4.06474	4.80857e-05	0.000376104	4060
AT4TE17500	2209.5	0.380316	0.0826585	4.60106	4.20347e-06	3.91191e-05	4140
AT2TE09100	1379.96	0.379543	0.0894582	4.24268	2.20867e-05	0.000183061	4708
AT4TE16185	2115.27	0.378701	0.0857135	4.41822	9.9519e-06	8.77004e-05	5932
AT4TE15570	1020.5	0.377636	0.0960268	3.93261	8.40277e-05	0.000628069	4337
AT4TE16945	12243.9	0.377321	0.0679734	5.55101	2.84024e-08	3.53932e-07	12441
AT2TE17640	568.509	0.377263	0.121609	3.10227	0.00192042	0.0103174	1302
AT4TE19340	812.127	0.376641	0.102153	3.68702	0.000226896	0.00153922	2567
AT1TE44380	2832.74	0.374788	0.071946	5.20929	1.89561e-07	2.14266e-06	4979
AT2TE17940	809.485	0.374734	0.103142	3.6332	0.000279931	0.00185972	1696
AT2TE16530	2036.73	0.374397	0.0791954	4.72751	2.2729e-06	2.20948e-05	7290
AT4TE22600	494.951	0.374173	0.128169	2.91938	0.00350727	0.0173946	7196
AT4TE16020	1105.09	0.373982	0.0947517	3.94697	7.91481e-05	0.000594189	4041
AT4TE18730	672.21	0.37386	0.111662	3.34815	0.000813536	0.00483354	2098
AT3TE56625	339.812	0.372671	0.142927	2.60742	0.00912281	0.0396569	469
AT4TE17180	533.768	0.372621	0.123964	3.0059	0.002648	0.0136432	1753
AT4TE13290	1801.05	0.372261	0.0837134	4.44685	8.71397e-06	7.7556e-05	3830
AT2TE00030	2568.82	0.371284	0.0789549	4.70248	2.57019e-06	2.47217e-05	10584
AT2TE15495	377.671	0.371146	0.141506	2.62282	0.00872044	0.0381542	1572
AT3TE58055	609.06	0.370989	0.116046	3.19692	0.00138903	0.00775647	1323
AT3TE90530	2432.05	0.370958	0.0858375	4.32163	1.54878e-05	0.000131959	4435
AT4TE18610	1339.03	0.370228	0.0906457	4.08434	4.42016e-05	0.000347751	3549
AT3TE57150	2736.13	0.370168	0.0725397	5.10296	3.34373e-07	3.66269e-06	5908
AT2TE18890	406.907	0.369517	0.145624	2.53747	0.0111657	0.0469924	792
AT4TE15665	4456.5	0.369035	0.0716291	5.15203	2.5768e-07	2.85916e-06	15388
AT2TE09500	2885.42	0.368347	0.0760723	4.84207	1.28494e-06	1.29312e-05	5268
AT4TE16400	2676.18	0.367583	0.0750672	4.89672	9.74473e-07	9.99516e-06	6335
AT2TE15490	3137.69	0.367313	0.0719271	5.10674	3.27768e-07	3.59417e-06	4537
AT4TE16910	5402.15	0.367197	0.0702834	5.22452	1.74607e-07	1.98125e-06	7601
AT3TE39430	543.097	0.367036	0.122773	2.98954	0.00279394	0.0142913	2082
AT4TE18755	2446.98	0.366424	0.0780999	4.69174	2.70896e-06	2.59472e-05	6806
AT2TE13685	1545.26	0.366319	0.0862084	4.24923	2.14509e-05	0.000178293	5756
AT4TE16080	3983.66	0.366267	0.0689113	5.31505	1.06626e-07	1.24176e-06	13694
AT4TE14225	547.971	0.365721	0.123972	2.95002	0.00317754	0.015981	2032
AT4TE22095	2980.08	0.365233	0.0745547	4.89886	9.63937e-07	9.89944e-06	5276
AT3TE59230	832.511	0.365058	0.106581	3.42517	0.000614424	0.00376943	2356
AT3TE51140	1786.84	0.364557	0.0800074	4.55654	5.2002e-06	4.77082e-05	4371
AT2TE16600	772.548	0.363875	0.107464	3.386	0.000709195	0.0042812	1599
AT3TE56630	2189.48	0.363297	0.077491	4.68825	2.75551e-06	2.63735e-05	4456
AT4TE64180	5664.92	0.362393	0.0658474	5.50353	3.72254e-08	4.5791e-07	7280
AT2TE16645	480.835	0.361895	0.138357	2.61566	0.00890544	0.0388726	1681
AT4TE19885	561.074	0.361708	0.119254	3.03309	0.00242063	0.0126172	1399
AT4TE15110	1030.39	0.361393	0.100066	3.61155	0.000304371	0.00200427	3644
AT2TE16635	868.991	0.360945	0.107807	3.34808	0.000813743	0.00483354	2509
AT4TE16725	3470.93	0.36078	0.0777205	4.64201	3.45034e-06	3.25105e-05	10009
AT2TE16500	561.957	0.360378	0.118819	3.033	0.00242137	0.0126195	1766
AT4TE14035	6136.14	0.359873	0.0684745	5.25557	1.47566e-07	1.69028e-06	11760
AT2TE11300	690.33	0.359785	0.111785	3.21855	0.00128843	0.00724982	1504
AT2TE15415	913.087	0.359598	0.100267	3.5864	0.000335273	0.00219135	5988
AT2TE16900	388.35	0.359557	0.138767	2.59108	0.00956739	0.0412583	932
AT2TE16445	806.568	0.359373	0.116362	3.08841	0.00201228	0.0107522	2304
AT4TE13975	911.255	0.359213	0.100652	3.56885	0.00035855	0.00232823	2407
AT1TE46775	676.662	0.35884	0.108854	3.29653	0.000978875	0.00568785	1215
AT2TE16010	1209.79	0.358627	0.0974247	3.68107	0.000232259	0.00157197	2961
AT4TE20545	532.412	0.358374	0.119103	3.00895	0.00262156	0.0135307	1280
AT3TE59185	1469.01	0.357611	0.0847688	4.21866	2.45755e-05	0.000202221	2687
AT4TE08970	558.853	0.357207	0.126899	2.81489	0.00487942	0.0232128	1092
AT3TE67635	3532.88	0.356769	0.0722601	4.93729	7.92176e-07	8.2259e-06	5737
AT4TE14185	1334.13	0.356655	0.09191	3.88048	0.000104249	0.000759442	3647
AT2TE13950	3016.55	0.356337	0.0780324	4.56652	4.95884e-06	4.56773e-05	11014
AT3TE55410	918.867	0.3562	0.102262	3.48321	0.000495444	0.00312053	1749
AT5TE39100	842.85	0.35601	0.102206	3.48325	0.000495374	0.00312053	1709
AT4TE18705	701.589	0.35555	0.107948	3.2937	0.000988767	0.00573884	1725
AT4TE14245	1880.5	0.355366	0.086992	4.08504	4.40683e-05	0.000346793	5450
AT2TE17925	1023.86	0.355305	0.0958034	3.70869	0.000208333	0.00142648	3183
AT4TE10165	1762.68	0.35529	0.0831122	4.27483	1.91287e-05	0.000160556	4439
AT4TE42950	1318.9	0.355222	0.0923617	3.84599	0.000120066	0.000864129	4604
AT4TE16150	1667.28	0.355167	0.0898747	3.9518	7.75646e-05	0.000583687	5418
AT3TE53590	605.315	0.354974	0.116878	3.03712	0.00238851	0.0124688	1387
AT2TE17935	1939.88	0.354926	0.0810013	4.38174	1.17738e-05	0.000102547	4986
AT4TE13315	2203.78	0.35449	0.0775718	4.56984	4.88105e-06	4.50213e-05	5224
AT4TE14860	375.28	0.354477	0.140124	2.52973	0.011415	0.0477871	1364
AT4TE20955	1308.75	0.354209	0.0895379	3.95597	7.62261e-05	0.000574245	1910
AT5TE60290	3638.41	0.353618	0.0685719	5.15689	2.51087e-07	2.78978e-06	4926
AT2TE16575	3824.78	0.352206	0.0758813	4.64154	3.45816e-06	3.25767e-05	10447
AT3TE56740	2181.63	0.351362	0.0808252	4.34718	1.37899e-05	0.000118549	3785
AT3TE51810	1132.88	0.350994	0.0955531	3.67329	0.000239446	0.00161477	1735
AT3TE52370	715.824	0.349635	0.108148	3.23292	0.00122531	0.0069336	1782
AT5TE46270	430.085	0.349391	0.136796	2.5541	0.0106461	0.0450781	1116
AT2TE17405	1563.86	0.349278	0.0924109	3.77962	0.000157067	0.00110151	4186
AT4TE15705	473.247	0.348808	0.136875	2.54836	0.0108229	0.0457418	1868
AT4TE14500	1148.45	0.348556	0.10201	3.41687	0.000633459	0.00387177	4553
AT3TE55355	3476.6	0.348341	0.0763008	4.56536	4.98631e-06	4.58892e-05	7262
AT4TE14305	642.235	0.348235	0.110976	3.13793	0.00170146	0.00927064	1382
AT4TE14330	3056.56	0.347683	0.0838561	4.14618	3.38062e-05	0.000272024	8114
AT2TE16895	784.183	0.347644	0.10392	3.34529	0.000821963	0.00487673	2099
AT1TE51005	816.887	0.346891	0.103616	3.34785	0.000814407	0.00483609	1658
AT4TE14580	653.655	0.346819	0.116075	2.98787	0.00280927	0.0143625	2101
AT2TE16580	1262.9	0.346739	0.0911509	3.80401	0.000142372	0.00100843	3410
AT4TE15585	3176.65	0.346556	0.0750647	4.61677	3.89766e-06	3.63587e-05	11337
AT2TE13440	2988.72	0.345567	0.0831245	4.15722	3.22142e-05	0.000260335	9236
AT4TE18070	678.745	0.345156	0.115888	2.97835	0.00289807	0.014756	1467
AT4TE18745	644.973	0.345053	0.111173	3.10376	0.0019108	0.0102751	1387
AT4TE09135	735.008	0.344644	0.117084	2.94357	0.00324453	0.0162721	1348
AT5TE43485	799.547	0.344436	0.109169	3.15508	0.00160457	0.00881279	1650
AT2TE16570	563.138	0.34428	0.117021	2.94203	0.00326072	0.0163394	1911
AT3TE57180	1813.13	0.343669	0.0825923	4.16103	3.16812e-05	0.00025655	4307
AT4TE16380	6278.9	0.343455	0.0743178	4.62144	3.81093e-06	3.56386e-05	17485
AT4TE18365	3150	0.343234	0.0727801	4.71603	2.40487e-06	2.32676e-05	8530
AT4TE14540	5479.75	0.343187	0.0717574	4.78259	1.73047e-06	1.7064e-05	10293
AT2TE18895	2003.88	0.343001	0.0822737	4.16902	3.05906e-05	0.000248239	4420
AT4TE18065	2788.09	0.342804	0.0747633	4.5852	4.53561e-06	4.19763e-05	5169
AT5TE43460	1511.49	0.342794	0.0900033	3.80869	0.000139708	0.000992806	3156
AT2TE18830	4454.45	0.342489	0.0705078	4.85747	1.18894e-06	1.20299e-05	10114
AT2TE16030	1517.07	0.342455	0.0841443	4.06985	4.70428e-05	0.000368649	5054
AT4TE09585	502.511	0.341862	0.121777	2.80727	0.00499632	0.0236771	1175
AT3TE55425	1561.08	0.341808	0.0931871	3.66798	0.000244475	0.00164652	3489
AT4TE16390	3238.32	0.341701	0.0781272	4.37365	1.22187e-05	0.000106197	10053
AT4TE18775	2114.56	0.341541	0.0906296	3.76854	0.000164205	0.00114687	5149
AT4TE16085	1850.6	0.341311	0.0836974	4.07791	4.54416e-05	0.000356917	6433
AT4TE14545	393.273	0.340699	0.135379	2.51664	0.0118479	0.0492985	1216
AT4TE14370	1198.64	0.340409	0.0969622	3.51074	0.000446857	0.00284278	4205
AT4TE14065	856.602	0.340403	0.108566	3.13546	0.00171586	0.00933551	2870
AT2TE11920	1177.95	0.34039	0.0894732	3.80438	0.000142161	0.00100744	3536
AT4TE15470	577.122	0.340366	0.125025	2.72238	0.00648138	0.0296285	2107
AT5TE46105	1140.69	0.340075	0.0913414	3.72312	0.000196778	0.00135617	2741
AT4TE18060	2017.25	0.339766	0.0780927	4.35081	1.35638e-05	0.000116752	4596
AT5TE45065	900.522	0.339004	0.102434	3.30949	0.00093465	0.00546098	1769
AT2TE16390	864.557	0.338723	0.111454	3.03913	0.00237261	0.0123905	3334
AT4TE10245	718.653	0.337974	0.110412	3.06104	0.00220573	0.0116313	1751
AT4TE14240	423.838	0.336823	0.134032	2.513	0.0119708	0.0497142	1455
AT2TE19485	885.69	0.33672	0.103214	3.26235	0.00110495	0.00632386	2446
AT3TE48170	1498.11	0.335745	0.0854549	3.92892	8.53293e-05	0.00063664	2761
AT2TE16710	1124.82	0.334783	0.0956912	3.49858	0.000467751	0.00296062	3044
AT3TE53600	1317.88	0.334398	0.0884547	3.78044	0.000156552	0.00109846	3361
AT5TE44225	1594.2	0.334293	0.0854965	3.91002	9.22879e-05	0.000682611	3287
AT4TE14410	1244.26	0.334147	0.100376	3.32895	0.000871747	0.00513873	3809
AT2TE17570	838.829	0.333651	0.106471	3.13374	0.00172592	0.00938031	2009
AT4TE18765	927.067	0.333215	0.104737	3.18144	0.00146543	0.00813449	2632
AT3TE58010	1916.13	0.33303	0.0820177	4.06046	4.89755e-05	0.000382481	4081
AT2TE17625	3435.71	0.332283	0.0757848	4.38456	1.16221e-05	0.000101376	7562
AT5TE43435	958.42	0.332249	0.106838	3.10983	0.00187196	0.0100885	2180
AT3TE57835	925.674	0.33213	0.0982983	3.3788	0.000728035	0.00438142	2893
AT3TE52250	509.127	0.330955	0.13165	2.5139	0.0119405	0.0496335	1103
AT4TE18700	1417.73	0.330559	0.0930498	3.5525	0.000381592	0.00246422	3703
AT4TE18695	1173.69	0.330291	0.0962667	3.431	0.000601354	0.00369753	2813
AT2TE19590	2590.44	0.329652	0.0746846	4.41392	1.01515e-05	8.93258e-05	7859
AT2TE13955	1619.8	0.328967	0.0909769	3.61594	0.000299255	0.00197375	5234
AT2TE16865	2997.84	0.32876	0.0780822	4.21043	2.54885e-05	0.00020919	6975
AT4TE18370	566.779	0.328647	0.118806	2.76625	0.00567051	0.0264063	1163
AT3TE57705	2059.34	0.328399	0.079398	4.13612	3.53232e-05	0.00028315	3735
AT4TE18720	1966.4	0.327368	0.0784388	4.17354	2.99897e-05	0.000243651	5208
AT2TE10955	1743.38	0.327028	0.079603	4.10824	3.98686e-05	0.000316286	3789
AT2TE00015	4544.27	0.327024	0.0750947	4.35482	1.33175e-05	0.000114848	16354
AT2TE20095	671.963	0.326832	0.111651	2.92727	0.00341952	0.0170189	1516
AT4TE17475	513.38	0.326669	0.122236	2.67244	0.00753029	0.0336892	923
AT4TE19170	1930.63	0.326354	0.0808037	4.03884	5.37155e-05	0.000416728	4229
AT4TE14850	768.699	0.326294	0.105366	3.09676	0.00195648	0.010483	2914
AT3TE59180	2123.26	0.325645	0.0760034	4.28462	1.83055e-05	0.000154241	3995
AT2TE18015	1818.47	0.32558	0.0841547	3.86883	0.000109358	0.000792337	4399
AT4TE15685	2175.38	0.324794	0.0868473	3.73983	0.000184146	0.00127402	9028
AT4TE15820	2492.6	0.322761	0.081	3.9847	6.75641e-05	0.000513318	8255
AT4TE20970	1019.27	0.321711	0.0986693	3.2605	0.00111216	0.00636071	1806
AT4TE18015	1518.33	0.321601	0.084001	3.82854	0.000128904	0.000921447	4069
AT2TE16620	1702.02	0.321481	0.0814087	3.94898	7.84857e-05	0.000589754	5667
AT4TE21050	2445.29	0.321277	0.0763487	4.20802	2.57616e-05	0.000211305	4709
AT3TE55650	722.277	0.321195	0.108749	2.95356	0.00314136	0.01583	69
AT4TE14000	1243.78	0.321189	0.0966703	3.32252	0.000892078	0.00524129	3011
AT2TE19240	1578.97	0.321137	0.0847148	3.79081	0.000150159	0.00105757	5213
AT3TE59170	3889.3	0.321036	0.0666902	4.81385	1.48052e-06	1.47765e-05	8347
AT4TE50435	5434.43	0.321012	0.0719332	4.46264	8.09547e-06	7.24612e-05	5062
AT4TE13490	588.485	0.320917	0.125693	2.55317	0.0106746	0.0451941	1495
AT5TE40525	576.246	0.320717	0.118176	2.71388	0.00664995	0.030279	1384
AT3TE55440	1086.23	0.320666	0.0973179	3.29503	0.000984099	0.00571659	2448
AT1TE40355	2218.46	0.320325	0.0753997	4.24836	2.15342e-05	0.000178843	3291
AT3TE57995	867.531	0.320318	0.113128	2.83146	0.0046336	0.0221961	2780
AT3TE55370	624.106	0.320267	0.115348	2.77654	0.00549414	0.0257044	1254
AT3TE58875	1091.27	0.319881	0.0936074	3.41726	0.000632556	0.00386682	4290
AT4TE54700	1747.39	0.31919	0.0888969	3.59057	0.00032996	0.00215929	2819
AT5TE46045	700.68	0.318916	0.111652	2.85635	0.00428539	0.0207382	1616
AT2TE16255	1756.26	0.318456	0.0863002	3.69009	0.000224172	0.001523	3681
AT3TE60635	2646.12	0.317917	0.0770946	4.12373	3.7279e-05	0.000298102	4369
AT4TE19915	8256.5	0.317801	0.0641728	4.95226	7.33569e-07	7.65213e-06	13459
AT4TE09460	1002.35	0.317644	0.0944621	3.36266	0.00077196	0.00461604	2678
AT4TE09800	2175.42	0.317465	0.0772098	4.11172	3.9273e-05	0.000311923	4732
AT5TE41520	938.031	0.317163	0.10316	3.07447	0.00210877	0.0111846	2277
AT2TE17585	555.908	0.316192	0.120396	2.62626	0.00863295	0.0378642	1801
AT4TE18315	3761.55	0.316056	0.0715887	4.41488	1.01064e-05	8.89665e-05	10494
AT2TE18435	1793.3	0.315745	0.0831626	3.79672	0.000146622	0.0010355	3716
AT2TE19515	614.906	0.315424	0.113854	2.77043	0.00559817	0.0261153	1171
AT4TE15255	3891.06	0.315284	0.0682333	4.62068	3.82485e-06	3.57525e-05	9914
AT4TE19135	8086.6	0.315165	0.066704	4.72483	2.30305e-06	2.23562e-05	18470
AT3TE54705	3525.53	0.314809	0.070462	4.46779	7.90316e-06	7.09232e-05	7065
AT2TE16235	3661.72	0.314268	0.0710339	4.4242	9.68002e-06	8.54694e-05	10667
AT3TE54535	2874.81	0.314092	0.0737352	4.25973	2.04678e-05	0.000170884	6420
AT4TE17360	13238.2	0.312997	0.0635705	4.92362	8.49575e-07	8.782e-06	10179
AT3TE59470	564.485	0.312728	0.118394	2.64141	0.00825609	0.0364602	1525
AT2TE17875	2708.07	0.312105	0.0785826	3.97168	7.1368e-05	0.000540121	7746
AT5TE45200	1412.88	0.311872	0.0892576	3.49406	0.000475729	0.00300557	3170
AT4TE16745	1160.21	0.310614	0.0917169	3.38666	0.000707482	0.00427149	3703
AT4TE18670	1123.46	0.309894	0.0971687	3.18924	0.00142648	0.00793864	2568
AT3TE54865	1658.13	0.309799	0.0855493	3.62129	0.000293139	0.00193677	4050
AT3TE55395	6045.02	0.308797	0.0678771	4.54935	5.38122e-06	4.93028e-05	11608
AT4TE13450	3246.81	0.308746	0.0743398	4.15317	3.27896e-05	0.000264673	8197
AT5TE43730	1413.75	0.30853	0.0976175	3.1606	0.00157444	0.00866932	3180
AT4TE14520	3021.91	0.307786	0.072038	4.27255	1.93248e-05	0.000161998	11447
AT4TE18360	1127.95	0.307502	0.0953688	3.22435	0.00126261	0.00712015	3069
AT4TE17470	3750.16	0.307403	0.0704062	4.36614	1.26464e-05	0.000109636	8211
AT1TE45805	1962.49	0.306958	0.0812182	3.77942	0.000157191	0.001102	3725
AT5TE40345	623.253	0.306848	0.113235	2.70983	0.00673178	0.030576	1444
AT2TE19575	1403.89	0.306075	0.0856972	3.57158	0.000354829	0.00230734	3846
AT2TE11340	1076.24	0.304637	0.0947212	3.21614	0.00129929	0.00730293	2426
AT4TE17505	727.82	0.304473	0.114281	2.66424	0.00771618	0.0343713	1417
AT5TE44055	2433.98	0.304373	0.0789658	3.85449	0.00011597	0.000836998	4687
AT3TE56895	632.236	0.304282	0.120788	2.51913	0.0117645	0.0490208	60
AT3TE59155	3542.59	0.304155	0.0727709	4.17962	2.91995e-05	0.000238031	8444
AT4TE14490	552.617	0.303967	0.119753	2.53829	0.0111397	0.0468924	2241
AT4TE20205	1911.33	0.303494	0.0800708	3.79033	0.00015045	0.00105944	4536
AT3TE55430	1653.21	0.303444	0.0904028	3.35658	0.000789139	0.00470576	4552
AT1TE48765	2853.11	0.303411	0.0763718	3.97282	7.10267e-05	0.000537835	9556
AT3TE57265	1824.35	0.30289	0.0805318	3.76113	0.00016915	0.0011792	4974
AT2TE16820	705.288	0.30211	0.119136	2.53585	0.0112174	0.0471713	995
AT4TE15365	1172.19	0.302054	0.0898699	3.36101	0.00077658	0.00464029	4467
AT3TE55365	1888.39	0.301481	0.0844379	3.57045	0.000356374	0.00231556	4049
AT2TE10945	1843.73	0.301465	0.0802697	3.75565	0.000172893	0.00120367	4084
AT3TE57685	1625.43	0.301365	0.0825257	3.65177	0.000260442	0.00174235	3700
AT3TE57660	932.012	0.301035	0.0997621	3.01753	0.00254844	0.0132031	2991
AT1TE51705	1875.38	0.30036	0.085829	3.49952	0.000466096	0.00295151	1655
AT2TE11765	943.467	0.300275	0.100722	2.98123	0.00287097	0.0146379	1828
AT4TE16200	1257.75	0.300251	0.0985438	3.04688	0.00231231	0.0121357	4577
AT4TE40685	2444.55	0.300217	0.0776273	3.86742	0.000109993	0.000796658	3977
AT4TE19830	3046.23	0.299486	0.0717667	4.17305	3.00552e-05	0.000244135	7004
AT3TE57085	4115.91	0.299252	0.0740899	4.03904	5.36709e-05	0.000416461	10207
AT4TE21095	1115.87	0.299237	0.0923187	3.24134	0.00118968	0.00675896	1589
AT5TE41485	1671.59	0.299204	0.0912037	3.28061	0.00103584	0.00597433	4092
AT2TE12425	1682.98	0.298998	0.0804612	3.71605	0.000202358	0.00139043	3928
AT2TE15565	1583.9	0.298754	0.0885968	3.37206	0.000746073	0.0044808	5665
AT5TE40175	936.979	0.298625	0.102103	2.92474	0.0034474	0.0171369	1704
AT4TE15970	976.381	0.298493	0.0999314	2.98698	0.00281752	0.0143957	3423
AT4TE15235	1099.12	0.298476	0.0936267	3.18794	0.0014329	0.00797006	3993
AT3TE06550	3261.78	0.298376	0.0767826	3.88598	0.000101917	0.000745383	5260
AT4TE18075	1530.85	0.298078	0.0828701	3.59693	0.000321995	0.00211154	4149
AT2TE10980	4519.08	0.298074	0.067362	4.42496	9.64623e-06	8.51893e-05	10627
AT4TE18995	1152.19	0.297664	0.0936869	3.17723	0.0014869	0.00823475	4007
AT3TE52365	2790.34	0.297488	0.0717775	4.14459	3.40424e-05	0.000273711	7783
AT3TE60925	624.353	0.296999	0.114061	2.60386	0.00921801	0.0399992	2632
AT5TE46175	3499.81	0.296413	0.0708623	4.18295	2.87756e-05	0.000234715	7856
AT4TE19150	2771.88	0.296262	0.0780933	3.79369	0.000148422	0.00104677	5431
AT4TE16385	1398.83	0.295918	0.0937637	3.15599	0.00159954	0.00879339	3974
AT1TE47775	736.543	0.295837	0.112127	2.63841	0.00832959	0.0367413	1524
AT5TE41095	920.824	0.295436	0.0983796	3.00302	0.00267313	0.0137572	2102
AT2TE16585	576.654	0.295152	0.116937	2.52402	0.0116023	0.0484283	1594
AT5TE46280	2204.01	0.295082	0.0778379	3.79098	0.000150052	0.001057	5175
AT4TE17510	4698.55	0.294654	0.0660683	4.45983	8.20231e-06	7.33675e-05	9978
AT5TE46090	1856.84	0.294526	0.0847262	3.47621	0.000508557	0.00318846	3992
AT2TE19200	1434.01	0.294515	0.0853405	3.45106	0.000558398	0.0034607	4947
AT5TE45005	3260.87	0.294413	0.0749997	3.92553	8.65396e-05	0.000644501	9438
AT1TE43605	1400.97	0.294246	0.08472	3.47316	0.000514371	0.00321952	2732
AT4TE19910	3492.65	0.29334	0.0753445	3.89332	9.88804e-05	0.000725888	7211
AT4TE18320	689.059	0.293242	0.109111	2.68756	0.00719772	0.0324023	1714
AT4TE17160	698.959	0.292809	0.113858	2.5717	0.0101199	0.0432284	2179
AT3TE54540	688.259	0.292696	0.111097	2.6346	0.00842363	0.0370885	1413
AT3TE61050	2424.71	0.292455	0.084417	3.46441	0.000531404	0.00331553	5158
AT5TE40575	2934.88	0.292173	0.076091	3.83979	0.000123142	0.000883791	4901
AT5TE41265	3604.48	0.291146	0.0746307	3.90115	9.57363e-05	0.000704821	7660
AT2TE15920	830.231	0.290884	0.105508	2.75698	0.00583383	0.0270534	3133
AT5TE40560	1749.79	0.290518	0.088902	3.26785	0.00108369	0.00621782	4024
AT2TE19445	1602.27	0.290451	0.0897742	3.23535	0.00121492	0.00688142	4809
AT4TE15565	1166.11	0.290359	0.100028	2.90279	0.00369855	0.0182289	4775
AT2TE16230	6011.72	0.289924	0.0676498	4.28566	1.82198e-05	0.000153581	16105
AT2TE13635	623.629	0.289874	0.114466	2.5324	0.0113285	0.0475171	2711
AT2TE16800	8925.98	0.289435	0.0676979	4.27539	1.90804e-05	0.000160244	20083
AT4TE17240	4612.59	0.289384	0.0723379	4.00045	6.32232e-05	0.000484185	8553
AT4TE24135	710.294	0.289197	0.107028	2.70207	0.00689094	0.0312265	981
AT4TE20535	3052.4	0.289055	0.0706125	4.09355	4.24828e-05	0.000335794	7591
AT3TE62015	683.235	0.288826	0.112747	2.56172	0.0104154	0.0442698	513
AT1TE47580	783.348	0.288371	0.10734	2.68652	0.00722007	0.0324887	1689
AT2TE16265	1091.8	0.287009	0.0945217	3.03644	0.0023939	0.0124953	2429
AT2TE17610	1259.42	0.286859	0.0961669	2.98292	0.00285509	0.0145714	3163
AT5TE42335	3866.72	0.286433	0.0721962	3.96743	7.26517e-05	0.000549331	4830
AT3TE53215	4997.07	0.286316	0.0700412	4.08783	4.35425e-05	0.000343181	10956
AT5TE41135	2927.69	0.28626	0.0734658	3.89651	9.75896e-05	0.000717052	7091
AT1TE47340	639.107	0.286231	0.112545	2.54325	0.0109827	0.0463407	1689
AT2TE19005	3929.75	0.285529	0.0727783	3.92327	8.73539e-05	0.000650094	12719
AT4TE17145	611.039	0.285431	0.11333	2.51859	0.0117827	0.0490815	1777
AT4TE18825	2065.54	0.285427	0.0809159	3.52745	0.000419588	0.00268554	5881
AT3TE55330	1493.39	0.28516	0.0849905	3.3552	0.000793075	0.00472443	2287
AT4TE19875	1055.07	0.285026	0.0957622	2.97639	0.00291661	0.0148357	2788
AT2TE16825	4593.08	0.284801	0.0676599	4.20931	2.56157e-05	0.00021015	7174
AT3TE63050	4124.19	0.284381	0.0682176	4.16873	3.06295e-05	0.000248506	5628
AT3TE57125	1663	0.284181	0.0840028	3.38299	0.000717011	0.00432141	3483
AT2TE16310	2066.5	0.284177	0.0898298	3.1635	0.00155882	0.00859024	8534
AT2TE12505	714.231	0.284149	0.110791	2.56473	0.0103257	0.0439159	1672
AT5TE43825	1906.33	0.283862	0.090905	3.12263	0.00179246	0.00970471	3187
AT3TE56640	1304.28	0.283572	0.0898698	3.15537	0.00160296	0.00880748	3023
AT2TE17985	2133.16	0.2835	0.0783404	3.61883	0.00029594	0.00195408	6464
AT4TE36845	3305.89	0.283465	0.0814047	3.48218	0.000497356	0.00313066	5410
AT3TE55360	4384.01	0.28254	0.0729344	3.87389	0.000107111	0.000778522	9480
AT3TE55375	3028.44	0.282074	0.0812124	3.47328	0.000514136	0.00321903	6234
AT5TE40355	1196.42	0.281921	0.0951326	2.96345	0.00304211	0.0153902	2696
AT4TE20745	7127.93	0.28192	0.0648018	4.3505	1.35827e-05	0.00011689	11402
AT3TE57340	1082.36	0.281614	0.0925506	3.04281	0.00234377	0.0122679	2720
AT3TE56700	2475.93	0.281537	0.0741595	3.79638	0.000146827	0.00103641	5205
AT5TE42420	6200.34	0.281532	0.0726862	3.87326	0.000107391	0.000780424	11392
AT3TE60520	2345.57	0.280803	0.0737498	3.80751	0.000140374	0.000997197	4058
AT4TE20950	733.202	0.280674	0.107941	2.60025	0.0093155	0.0403286	1234
AT4TE08945	1418.43	0.280552	0.08757	3.20374	0.00135653	0.00759354	2801
AT5TE41150	1808.15	0.280344	0.0801574	3.49742	0.000469776	0.00297161	3972
AT3TE39395	846.048	0.279826	0.103694	2.69858	0.00696351	0.0314894	3480
AT2TE15880	3178.48	0.279398	0.0785451	3.55717	0.000374868	0.00242423	8956
AT3TE65835	761.903	0.279252	0.105871	2.63766	0.00834797	0.0368106	2655
AT3TE55240	1932.51	0.279053	0.0886811	3.14671	0.00165121	0.00903396	4776
AT2TE13390	947.549	0.279002	0.0975939	2.85881	0.00425234	0.0206018	2819
AT5TE43820	1986.81	0.278806	0.0817851	3.409	0.000652009	0.00396627	4446
AT5TE46260	1300.21	0.278503	0.0901844	3.08815	0.00201407	0.0107561	3333
AT4TE15295	727.752	0.278452	0.10651	2.61432	0.00894055	0.0389928	1570
AT4TE17200	1104.4	0.278386	0.093097	2.99028	0.00278719	0.0142652	4186
AT3TE54330	1844.87	0.278192	0.0797257	3.48936	0.00048417	0.00305561	5277
AT5TE44690	742.366	0.277836	0.105776	2.62666	0.00862284	0.03784	1211
AT1TE51065	1334.21	0.277548	0.0951031	2.91839	0.00351848	0.0174397	2352
AT2TE18455	1892.1	0.277452	0.0816341	3.39873	0.000676992	0.00410126	4622
AT2TE11370	2233.59	0.277161	0.0798774	3.46982	0.0005208	0.00325629	5372
AT3TE57050	2554.13	0.277055	0.0766417	3.61494	0.000300412	0.00198011	6851
AT3TE60675	1152.09	0.27664	0.0899232	3.07641	0.0020951	0.0111264	2537
AT2TE12020	1127.28	0.276268	0.0974876	2.83388	0.00459867	0.0220494	1648
AT3TE55340	3147.95	0.276028	0.0692542	3.98572	6.72753e-05	0.000511744	6184
AT4TE18330	2365.57	0.275955	0.0819144	3.36882	0.000754906	0.00452922	6934
AT4TE19040	1856.03	0.275918	0.0833921	3.30868	0.000937355	0.00547601	5097
AT3TE55735	961.893	0.275816	0.107491	2.56595	0.0102895	0.0437754	70
AT4TE09580	1029.14	0.27565	0.0962543	2.86377	0.0041863	0.0203306	2498
AT2TE19540	1507.88	0.274924	0.0839396	3.27526	0.00105564	0.00607127	4408
AT1TE35855	925.308	0.274499	0.0999131	2.74738	0.00600732	0.0277516	2441
AT1TE19430	2725.66	0.273457	0.0791263	3.45595	0.00054836	0.00340736	4800
AT1TE42800	1732.11	0.272635	0.0823164	3.31204	0.000926191	0.00541541	4553
AT4TE15080	1236.2	0.272226	0.0916372	2.97069	0.00297133	0.0150748	5275
AT5TE43975	3216.64	0.271988	0.0727502	3.73866	0.000185005	0.00127932	7441
AT5TE08870	705.572	0.271932	0.107623	2.5267	0.0115141	0.048114	2384
AT5TE42850	1049.06	0.271909	0.0961461	2.82808	0.00468286	0.0223982	2394
AT3TE54710	3783.07	0.271668	0.0706194	3.84693	0.000119605	0.000861115	9810
AT4TE16570	6463.08	0.271511	0.0690888	3.92989	8.49845e-05	0.000634298	7964
AT5TE45080	753.549	0.271441	0.105375	2.57596	0.00999629	0.0427847	1968
AT5TE42710	13761.6	0.271433	0.0643018	4.22123	2.42973e-05	0.000200173	10371
AT2TE12815	783.219	0.271197	0.104256	2.60127	0.00928795	0.0402475	2523
AT3TE54455	1802.36	0.271028	0.0815236	3.32453	0.000885663	0.00520881	5201
AT2TE18440	792.304	0.270906	0.104319	2.5969	0.00940685	0.0406727	1738
AT2TE13520	2036.38	0.270739	0.0776573	3.48634	0.000489687	0.00308663	9765
AT3TE57095	905.349	0.270614	0.104683	2.58507	0.00973594	0.0418578	2612
AT2TE11350	2805.79	0.270504	0.0756665	3.57495	0.000350292	0.00227964	6128
AT3TE53045	2421.31	0.270396	0.0795023	3.40111	0.00067114	0.00407001	8127
AT5TE44750	2377.68	0.270105	0.0754024	3.58218	0.000340745	0.00222314	5218
AT1TE49320	1972.8	0.270012	0.0780173	3.46092	0.000538325	0.00335362	4345
AT5TE43815	1924.57	0.269985	0.0823447	3.27872	0.0010428	0.00600749	4262
AT2TE11540	2729.02	0.269275	0.0756841	3.55788	0.000373865	0.00241812	7914
AT3TE57225	1696.58	0.268882	0.0902438	2.9795	0.00288717	0.0147096	4746
AT2TE19850	1249.26	0.26873	0.0899162	2.98867	0.00280198	0.0143288	3519
AT2TE08785	2727.37	0.267756	0.0734106	3.64738	0.000264928	0.00177121	5276
AT5TE40410	1818.66	0.267461	0.0848106	3.15363	0.00161256	0.0088555	4224
AT2TE18860	730.271	0.267238	0.105737	2.52739	0.0114915	0.0480487	1864
AT4TE18245	5050.83	0.266945	0.0672965	3.9667	7.28732e-05	0.000550601	10683
AT5TE40165	827.717	0.26694	0.101223	2.63715	0.00836055	0.0368587	1993
AT3TE53975	1029.96	0.26689	0.101232	2.63641	0.00837884	0.0369308	2429
AT5TE42825	859.068	0.266728	0.100226	2.66127	0.00778475	0.0346654	2168
AT2TE19065	758.436	0.26661	0.105101	2.5367	0.0111904	0.047077	1840
AT5TE15640	1032.05	0.266372	0.098719	2.69828	0.00696988	0.0315147	1444
AT3TE58570	1036.63	0.265994	0.0961117	2.76756	0.00564785	0.0263097	2508
AT5TE43260	8270.04	0.265905	0.0692004	3.84254	0.00012177	0.000875015	12779
AT4TE19030	3063.01	0.26587	0.0731832	3.63294	0.000280207	0.00186125	9716
AT2TE17145	2685.38	0.265797	0.0780236	3.40662	0.000657732	0.00399873	9214
AT5TE41455	1682.57	0.26546	0.0843638	3.14661	0.00165174	0.00903458	4395
AT4TE13555	1773.77	0.265279	0.0801543	3.3096	0.000934283	0.00545962	5779
AT2TE18715	1793.47	0.264809	0.0810841	3.26586	0.00109133	0.00625378	4163
AT5TE42265	4650.93	0.264567	0.0714177	3.70451	0.000211804	0.00144904	10342
AT3TE58020	2696.48	0.26343	0.0747203	3.52555	0.0004226	0.00270146	6077
AT2TE19055	1784.44	0.263416	0.0794358	3.31608	0.000912887	0.00534674	5210
AT2TE16545	1148.35	0.263349	0.0975454	2.69975	0.0069391	0.0313997	3576
AT3TE57490	1309.87	0.263261	0.0961907	2.73687	0.0062027	0.0285109	3744
AT5TE42900	8631.74	0.263257	0.0639114	4.11909	3.80366e-05	0.000303628	11393
AT1TE55795	2424.45	-0.263586	0.0738091	-3.57119	0.000355362	0.00230971	4711
AT5TE37985	805.131	-0.264399	0.103386	-2.5574	0.0105457	0.0447213	3219
AT1TE42445	750.067	-0.270191	0.106783	-2.53028	0.0113971	0.0477386	1580
AT1TE38530	5606.36	-0.270767	0.0640959	-4.22441	2.39568e-05	0.000197526	14551
AT5TE52410	1820.69	-0.272535	0.0840272	-3.24341	0.00118108	0.00671661	3210
AT2TE26855	4334.53	-0.273217	0.0683871	-3.99516	6.46518e-05	0.000494113	11805
AT3TE69475	689.163	-0.275786	0.108868	-2.53321	0.0113024	0.0474512	14301
AT5TE37290	1543.73	-0.279529	0.0828582	-3.37358	0.000741978	0.00445887	5367
AT3TE47935	1335.36	-0.279742	0.0889254	-3.14581	0.0016563	0.00905808	3850
AT4TE48215	908.535	-0.279846	0.100953	-2.77205	0.00557043	0.0260021	2809
AT5TE36970	3846.94	-0.280102	0.0687637	-4.07339	4.63335e-05	0.000363437	9239
AT2TE02465	5552.54	-0.28056	0.0650251	-4.31464	1.59862e-05	0.00013598	15814
AT3TE40125	1070.52	-0.281083	0.094519	-2.97382	0.00294116	0.0149328	2365
AT2TE24680	2559.88	-0.281578	0.0736948	-3.82087	0.000132983	0.000947966	11234
AT1TE44235	964.926	-0.282884	0.0974035	-2.90425	0.00368138	0.0181595	1661
AT5TE38830	716.164	-0.284229	0.107115	-2.65349	0.00796642	0.0353633	2249
AT4TE18205	1266.76	-0.284863	0.0932477	-3.05491	0.00225129	0.0118472	10995
AT1TE96100	851.172	-0.28547	0.105344	-2.70988	0.00673076	0.0305748	1808
AT2TE28035	642.851	-0.286007	0.112181	-2.54952	0.0107873	0.0456099	1317
AT5TE46970	4113.17	-0.288783	0.0702875	-4.10859	3.98075e-05	0.000315863	14738
AT3TE65175	2207.15	-0.289699	0.0895758	-3.23413	0.00122015	0.00690726	5356
AT2TE46755	622.86	-0.292541	0.115372	-2.53564	0.0112241	0.0471946	1313
AT1TE43355	4148.86	-0.293796	0.0658274	-4.46312	8.07741e-06	7.23447e-05	12394
AT3TE41650	773.104	-0.293864	0.104374	-2.81548	0.00487042	0.0231766	2344
AT5TE34980	1390.05	-0.295988	0.0902336	-3.28024	0.00103717	0.00598012	2412
AT5TE48190	2141.74	-0.297971	0.0769897	-3.87026	0.000108717	0.000788806	9313
AT4TE25200	3391.67	-0.29813	0.074018	-4.0278	5.63e-05	0.000435383	4972
AT2TE10385	1109.09	-0.298807	0.0931161	-3.20897	0.00133209	0.00746998	9905
AT1TE72970	2479.8	-0.299525	0.0745182	-4.0195	5.83228e-05	0.00044984	4685
AT3TE47220	856.63	-0.301988	0.106452	-2.83686	0.00455598	0.0218676	3027
AT5TE57960	835.653	-0.302541	0.103521	-2.92249	0.00347242	0.0172426	2496
AT1TE52020	622.081	-0.302567	0.114217	-2.64905	0.00807189	0.0357735	3837
AT2TE26910	5253.36	-0.304568	0.0657338	-4.63336	3.59786e-06	3.37999e-05	15490
AT3TE72860	943.533	-0.30622	0.101093	-3.0291	0.0024528	0.0127549	1185
AT5TE38810	778.934	-0.306307	0.104886	-2.92039	0.00349592	0.0173446	2416
AT2TE07145	1065.61	-0.306316	0.093272	-3.28411	0.00102303	0.00591186	4372
AT5TE64505	693.776	-0.307183	0.112943	-2.7198	0.00653221	0.0298212	1755
AT4TE04415	920.381	-0.310128	0.0988597	-3.13705	0.00170659	0.00929122	3157
AT2TE07745	639.472	-0.310637	0.120441	-2.57916	0.00990419	0.0424613	2319
AT5TE32645	629.087	-0.312367	0.114704	-2.72325	0.00646439	0.029566	2249
AT4TE21670	696.341	-0.312824	0.108157	-2.8923	0.00382429	0.0187766	2394
AT3TE63845	1379.39	-0.314124	0.0930357	-3.37638	0.000734464	0.00441559	3638
AT1TE54440	480.959	-0.31737	0.126287	-2.51308	0.0119681	0.049708	1536
AT3TE61035	659.116	-0.318735	0.112602	-2.83064	0.00464553	0.0222351	3483
AT3TE47495	496.163	-0.318874	0.125317	-2.54455	0.010942	0.0461974	645
AT5TE94555	668.48	-0.318918	0.115319	-2.76552	0.00568317	0.0264443	1590
AT1TE53735	634.639	-0.320597	0.119804	-2.676	0.00745061	0.0333945	2751
AT5TE64455	779.475	-0.321105	0.105629	-3.03993	0.00236631	0.012367	2342
AT3TE70530	796.209	-0.321272	0.107824	-2.97961	0.00288614	0.0147061	1779
AT1TE35680	922.029	-0.321786	0.100713	-3.19508	0.00139794	0.00780093	2769
AT1TE50020	965.149	-0.321922	0.101856	-3.16056	0.00157465	0.00866935	2449
AT1TE41765	814.824	-0.32487	0.109425	-2.9689	0.00298868	0.0151573	1798
AT3TE59770	522.973	-0.325888	0.121389	-2.68466	0.00726027	0.0326197	3551
AT1TE68310	1029.91	-0.326139	0.105696	-3.08562	0.00203128	0.0108393	2524
AT2TE06955	3635.44	-0.326582	0.0680149	-4.80163	1.57383e-06	1.56281e-05	8165
AT1TE54760	1775.39	-0.327835	0.0822	-3.98826	6.65587e-05	0.000506709	4094
AT3TE50295	4984.09	-0.32865	0.0683079	-4.8113	1.49954e-06	1.49554e-05	14591
AT1TE28370	6696.05	-0.329372	0.0651151	-5.05831	4.22978e-07	4.57475e-06	7747
AT4TE28515	1454.61	-0.329923	0.0849815	-3.88229	0.000103478	0.000754922	2699
AT5TE36405	1458.11	-0.330164	0.0870557	-3.79257	0.000149098	0.00105082	3245
AT1TE32755	917.259	-0.330284	0.103976	-3.17656	0.00149034	0.00824936	1917
AT5TE24040	1192.06	-0.330973	0.0894511	-3.70004	0.000215564	0.00147209	2373
AT1TE27405	1120.69	-0.331306	0.0931003	-3.5586	0.000372844	0.00241228	2208
AT5TE38815	669.768	-0.332184	0.110353	-3.01018	0.00261093	0.0134877	2143
AT1TE29570	1365.91	-0.332495	0.090836	-3.66039	0.000251833	0.00169054	2438
AT3TE76405	564.644	-0.335806	0.11936	-2.81339	0.00490226	0.023304	1213
AT5TE25535	544.739	-0.337995	0.12388	-2.7284	0.00636426	0.0291873	1284
AT3TE76010	1954.9	-0.340998	0.0778621	-4.37951	1.18947e-05	0.000103577	5144
AT4TE27185	536.146	-0.341512	0.120254	-2.83991	0.0045126	0.0216847	2479
AT2TE42810	4179.25	-0.342415	0.0681819	-5.02208	5.11159e-07	5.45953e-06	8178
AT5TE39230	1910.57	-0.343028	0.0801255	-4.28114	1.85941e-05	0.000156544	4774
AT4TE48225	840.142	-0.343248	0.102566	-3.34662	0.000818042	0.00485557	1893
AT5TE50605	806.971	-0.344144	0.102334	-3.36294	0.000771164	0.00461262	2621
AT3TE45430	629.28	-0.347858	0.117462	-2.96145	0.00306192	0.0154733	1707
AT4TE08240	629.478	-0.348752	0.116098	-3.00393	0.00266517	0.0137196	2806
AT2TE58965	615.105	-0.350433	0.119103	-2.94227	0.00325815	0.0163285	1313
AT3TE50500	1753.4	-0.350703	0.0831485	-4.21779	2.46703e-05	0.00020288	11367
AT2TE05755	2727.57	-0.351776	0.0771995	-4.55671	5.196e-06	4.76803e-05	7113
AT4TE03430	413.434	-0.35334	0.134922	-2.61884	0.00882289	0.0385369	1057
AT3TE44965	491.81	-0.353772	0.123907	-2.85513	0.00430189	0.020806	2708
AT4TE24325	449.778	-0.353963	0.132789	-2.6656	0.00768513	0.0342552	1091
AT5TE50570	796.313	-0.354054	0.105967	-3.34117	0.000834252	0.00494394	1894
AT2TE38245	1227.06	-0.354139	0.0892766	-3.96676	7.28558e-05	0.000550571	2372
AT3TE49015	637.987	-0.354402	0.115996	-3.05529	0.00224841	0.0118351	3149
AT1TE34045	504.929	-0.354915	0.132131	-2.68609	0.0072294	0.0325115	1357
AT5TE37330	499.6	-0.35502	0.130325	-2.72412	0.00644725	0.0295119	2014
AT5TE36400	2040.53	-0.357354	0.0789803	-4.5246	6.05106e-06	5.51817e-05	4670
AT2TE11165	439.647	-0.358206	0.130454	-2.74585	0.00603549	0.0278566	6158
AT5TE49700	1821.87	-0.358315	0.0801578	-4.47012	7.81772e-06	7.02024e-05	6144
AT3TE49700	560.634	-0.359544	0.117467	-3.0608	0.00220744	0.0116388	1658
AT5TE53975	616.737	-0.359991	0.115494	-3.11697	0.00182719	0.00987454	1313
AT1TE48050	554.932	-0.360423	0.118442	-3.04303	0.00234212	0.0122608	5445
AT1TE41625	1195.29	-0.367536	0.0914442	-4.01924	5.8385e-05	0.000450151	11057
AT5TE21595	570.618	-0.368669	0.129089	-2.85592	0.00429125	0.0207569	1590
AT2TE11400	476.541	-0.368943	0.125375	-2.94271	0.00325351	0.0163072	2649
AT1TE05280	425.781	-0.369629	0.14317	-2.58174	0.00983022	0.0422058	1390
AT4TE08130	351.998	-0.369794	0.142852	-2.58865	0.00963523	0.0414899	1332
AT1TE57655	1043.06	-0.370295	0.102585	-3.60965	0.000306608	0.00201804	2521
AT2TE51630	547.537	-0.371323	0.129379	-2.87004	0.00410418	0.0199861	1090
AT1TE55090	342.956	-0.372901	0.144268	-2.58478	0.00974404	0.0418839	754
AT3TE44695	328.426	-0.374954	0.14794	-2.53451	0.0112606	0.0473061	1274
AT3TE90030	1068.39	-0.375008	0.0949101	-3.95119	7.77636e-05	0.00058497	2724
AT1TE65500	625.92	-0.376001	0.113292	-3.31888	0.000903805	0.00530034	1913
AT5TE39315	970.936	-0.376586	0.0968067	-3.89009	0.000100209	0.000734458	3910
AT2TE40165	759.81	-0.377631	0.109513	-3.44829	0.000564143	0.00349276	2002
AT1TE54005	1295.52	-0.378769	0.0911982	-4.15325	3.27783e-05	0.000264634	5031
AT4TE21220	404.014	-0.379064	0.13431	-2.8223	0.00476799	0.0227313	5760
AT3TE49685	384.395	-0.379071	0.137421	-2.75847	0.00580732	0.0269487	780
AT4TE49990	2100.29	-0.379333	0.0781387	-4.85461	1.20625e-06	1.2187e-05	5210
AT5TE25480	1066.79	-0.379613	0.0933202	-4.06786	4.74475e-05	0.000371607	1830
AT2TE26865	1293.74	-0.381693	0.0875052	-4.36195	1.28908e-05	0.000111543	6474
AT5TE18900	321.697	-0.381729	0.147308	-2.59136	0.00955969	0.0412337	495
AT1TE28375	653.729	-0.382049	0.112909	-3.38368	0.000715219	0.00431215	786
AT1TE44930	373.046	-0.38276	0.148502	-2.57748	0.00995231	0.042632	1727
AT5TE37275	513.094	-0.38313	0.121543	-3.15221	0.00162038	0.0088913	1424
AT4TE09245	834.284	-0.384035	0.105105	-3.6538	0.000258387	0.00172973	3737
AT2TE33540	813.931	-0.384369	0.103952	-3.69758	0.000217665	0.00148416	2223
AT2TE26635	542.841	-0.385025	0.123218	-3.12474	0.00177961	0.00964179	1624
AT1TE50485	563.349	-0.386044	0.120349	-3.20771	0.00133796	0.00750082	1537
AT4TE44990	3316.76	-0.386093	0.0718401	-5.37434	7.68648e-08	9.11425e-07	5049
AT1TE45665	390.262	-0.386217	0.138205	-2.79452	0.0051976	0.0244898	1887
AT2TE22480	386.348	-0.387353	0.139439	-2.77794	0.00547045	0.025611	847
AT4TE13110	453.102	-0.387607	0.132185	-2.93231	0.00336454	0.0167984	4257
AT3TE51985	391.925	-0.388138	0.137025	-2.83262	0.00461687	0.0221255	2977
AT5TE36785	690.875	-0.38826	0.110266	-3.52113	0.000429717	0.00274312	2846
AT5TE55375	572.822	-0.388433	0.12046	-3.22459	0.00126153	0.007117	1788
AT3TE77610	421.367	-0.388621	0.140717	-2.76172	0.00574976	0.0267142	913
AT1TE53650	577.686	-0.389765	0.118746	-3.28235	0.00102945	0.00594392	1934
AT3TE65100	662.296	-0.39014	0.116269	-3.3555	0.00079221	0.00471997	1919
AT2TE24445	375.211	-0.390509	0.137987	-2.83004	0.00465417	0.0222739	1238
AT4TE27175	627.779	-0.391401	0.113809	-3.43909	0.000583666	0.00360008	3289
AT3TE62815	532.717	-0.391828	0.123335	-3.17694	0.00148839	0.00824189	1638
AT5TE35360	677.693	-0.392198	0.111609	-3.51404	0.00044135	0.00281083	3167
AT5TE86350	583.237	-0.392719	0.118059	-3.32647	0.000879532	0.00517572	1244
AT5TE39245	1081.52	-0.392935	0.0960875	-4.08934	4.32596e-05	0.000341344	3493
AT5TE52390	746.701	-0.393194	0.107585	-3.65473	0.000257456	0.00172463	1010
AT5TE03885	860.832	-0.394623	0.101989	-3.86927	0.000109163	0.00079133	2532
AT3TE45975	432.482	-0.394776	0.133479	-2.9576	0.00310043	0.0156468	960
AT1TE52200	856.117	-0.394841	0.101793	-3.87885	0.00010495	0.000764167	3979
AT4TE22935	469.894	-0.395163	0.125771	-3.14192	0.00167846	0.00915622	2038
AT1TE04710	348.335	-0.396693	0.146157	-2.71416	0.00664441	0.0302594	492
AT1TE54445	370.124	-0.396927	0.139743	-2.84041	0.00450553	0.0216583	1092
AT5TE48595	365.583	-0.3978	0.143362	-2.77479	0.00552369	0.0258271	862
AT1TE51595	299.444	-0.397991	0.156415	-2.54446	0.0109448	0.0462046	820
AT1TE51465	302.93	-0.399051	0.153278	-2.60345	0.00922904	0.0400344	2091
AT2TE10200	420.289	-0.399141	0.137496	-2.90293	0.00369692	0.018223	1073
AT5TE38820	1114.03	-0.400075	0.0971311	-4.11892	3.80656e-05	0.000303801	4407
AT1TE23420	550.194	-0.400182	0.127037	-3.15011	0.00163206	0.0089447	2279
AT4TE10600	1840.44	-0.400722	0.0830885	-4.82284	1.4153e-06	1.41565e-05	2093
AT5TE47385	351.066	-0.402173	0.142439	-2.82347	0.00475065	0.0226644	1764
AT3TE65170	289.824	-0.404631	0.154051	-2.6266	0.00862421	0.0378419	1687
AT1TE45720	649.195	-0.405866	0.112445	-3.60945	0.000306841	0.0020186	3673
AT3TE50805	371.695	-0.407925	0.139162	-2.93129	0.00337555	0.0168388	3649
AT5TE37250	267.605	-0.407951	0.15926	-2.56155	0.0104208	0.0442839	929
AT2TE09885	502.625	-0.408907	0.124973	-3.27195	0.00106807	0.00613589	3964
AT3TE61480	510.87	-0.409077	0.122556	-3.33789	0.000844179	0.00499829	2780
AT5TE49570	271.958	-0.409998	0.158185	-2.59189	0.00954489	0.0411872	907
AT5TE39480	415.571	-0.41042	0.141623	-2.89797	0.00375584	0.0184736	4444
AT5TE34715	348.189	-0.410642	0.143768	-2.85628	0.00428643	0.0207385	2706
AT3TE52090	366.144	-0.410659	0.145624	-2.81999	0.00480253	0.0228801	2485
AT1TE59235	1447.88	-0.411205	0.0877695	-4.68506	2.79876e-06	2.67513e-05	2982
AT1TE58625	1296.72	-0.411235	0.0968174	-4.24753	2.16143e-05	0.000179363	3532
AT1TE52780	263.848	-0.411482	0.160241	-2.56789	0.0102319	0.0436025	1658
AT5TE49710	420.272	-0.411766	0.132918	-3.09789	0.00194901	0.0104478	1126
AT1TE52040	294.068	-0.412456	0.155104	-2.65923	0.00783193	0.0348415	1327
AT3TE45630	653.784	-0.413018	0.113358	-3.64348	0.000268973	0.00179475	2205
AT3TE70590	8724.12	-0.413562	0.0676975	-6.10897	1.00274e-09	1.45151e-08	15185
AT1TE38350	589.542	-0.413564	0.11973	-3.45413	0.000552068	0.00342873	1145
AT2TE06550	585.117	-0.414773	0.123361	-3.36227	0.000773058	0.00462126	2262
AT5TE56560	1736.53	-0.415163	0.0847612	-4.89803	9.68e-07	9.93429e-06	2956
AT1TE57235	319.305	-0.41542	0.148502	-2.79741	0.00515136	0.0242997	1125
AT4TE03530	325.469	-0.41558	0.147792	-2.81193	0.00492451	0.023388	2635
AT4TE27445	284.359	-0.416414	0.158188	-2.6324	0.0084785	0.0372941	1611
AT4TE17790	337.994	-0.416543	0.146639	-2.84061	0.00450276	0.0216501	3354
AT5TE39325	327.011	-0.417425	0.147704	-2.82609	0.00471193	0.0225215	1317
AT5TE36315	310.677	-0.417598	0.153805	-2.71511	0.00662534	0.0301993	613
AT5TE51130	382.324	-0.417939	0.141554	-2.95251	0.00315205	0.0158664	931
AT3TE62500	451.91	-0.418224	0.138064	-3.02921	0.00245196	0.012753	1684
AT2TE89040	325.502	-0.419213	0.154426	-2.71465	0.00663461	0.0302248	1451
AT5TE49880	577.843	-0.419338	0.120031	-3.49359	0.000476581	0.00301002	1643
AT2TE28760	355.776	-0.41941	0.148066	-2.83259	0.00461725	0.0221255	1496
AT3TE21700	947.851	-0.419902	0.0977878	-4.29401	1.75475e-05	0.000148401	3310
AT2TE23715	366.65	-0.420364	0.139337	-3.01688	0.0025539	0.0132254	1086
AT2TE28290	497.326	-0.420406	0.12684	-3.31446	0.0009182	0.0053744	485
AT5TE51200	415.647	-0.420589	0.136072	-3.09092	0.00199536	0.0106712	2660
AT1TE45955	278.943	-0.421673	0.163366	-2.58116	0.0098468	0.0422725	2328
AT2TE37435	388.967	-0.42173	0.137125	-3.07551	0.00210141	0.0111542	1701
AT2TE04865	266.426	-0.422538	0.1599	-2.64251	0.00822938	0.0363657	1959
AT1TE51580	347.8	-0.422914	0.143136	-2.95464	0.00313038	0.0157844	1162
AT2TE26995	276.2	-0.423671	0.160087	-2.64651	0.00813277	0.0359968	3732
AT2TE25490	1064.35	-0.424185	0.0929079	-4.56565	4.97944e-06	4.58363e-05	2436
AT1TE53860	272.286	-0.425244	0.158327	-2.68586	0.00723438	0.0325246	1556
AT3TE63185	368.884	-0.425591	0.141506	-3.00758	0.00263339	0.0135833	1304
AT5TE39630	289.536	-0.425811	0.158376	-2.6886	0.00717517	0.0323221	1166
AT5TE36755	325.637	-0.427052	0.147945	-2.88655	0.0038949	0.0190891	1180
AT5TE64080	746.684	-0.427952	0.107556	-3.97886	6.92468e-05	0.000525131	2282
AT1TE75305	334.711	-0.42798	0.145647	-2.93847	0.00329837	0.0165039	8218
AT1TE64825	507.851	-0.428339	0.122331	-3.50149	0.000462668	0.00293342	1923
AT1TE44875	550.702	-0.428379	0.118163	-3.62532	0.000288606	0.00191118	2430
AT3TE64010	280.205	-0.428563	0.156092	-2.74559	0.00604031	0.0278757	1206
AT2TE06405	1218.45	-0.428877	0.0906272	-4.73233	2.21962e-06	2.15973e-05	4256
AT3TE61000	1509.96	-0.428949	0.0871254	-4.92335	8.50745e-07	8.78968e-06	5274
AT1TE35305	542.036	-0.429052	0.121637	-3.52732	0.000419791	0.00268608	2274
AT2TE29105	353.535	-0.429163	0.144938	-2.96102	0.00306626	0.0154895	1811
AT3TE65875	738.123	-0.429919	0.10635	-4.04251	5.28825e-05	0.000410731	12935
AT1TE21710	2134.46	-0.430188	0.0805463	-5.34088	9.24963e-08	1.08458e-06	5207
AT5TE67210	621.727	-0.430275	0.114726	-3.75047	0.000176506	0.00122653	1584
AT1TE40570	291.548	-0.430305	0.155945	-2.75933	0.005792	0.0268837	471
AT4TE17660	419.632	-0.431608	0.135529	-3.18463	0.0014494	0.00805307	3943
AT1TE13310	276.619	-0.432348	0.160684	-2.69067	0.00713085	0.0321506	1200
AT2TE05410	623.098	-0.43253	0.116899	-3.70004	0.000215567	0.00147209	4626
AT5TE31350	362.307	-0.432763	0.145786	-2.96848	0.00299277	0.0151705	6107
AT3TE46520	2149.86	-0.432936	0.0799851	-5.41271	6.20783e-08	7.44469e-07	4786
AT5TE41220	283.111	-0.433094	0.165674	-2.61413	0.00894545	0.0390083	2977
AT2TE41090	633.728	-0.433681	0.119858	-3.61828	0.000296567	0.00195759	1573
AT4TE44390	586.461	-0.433779	0.115266	-3.7633	0.000167687	0.0011696	1790
AT1TE64445	253.163	-0.434558	0.163401	-2.65946	0.00782669	0.0348258	2500
AT3TE49170	264.493	-0.434707	0.164927	-2.63575	0.00839516	0.0369869	1198
AT1TE38705	223.634	-0.435753	0.173385	-2.51321	0.0119637	0.0496948	770
AT2TE21970	434.428	-0.435872	0.142733	-3.05375	0.00226003	0.0118902	4334
AT1TE52745	243.104	-0.436538	0.16725	-2.6101	0.00905165	0.0394045	1468
AT2TE69490	398.992	-0.43654	0.138139	-3.16015	0.00157687	0.00868038	1256
AT5TE49820	457.253	-0.436995	0.133352	-3.27701	0.00104912	0.00603881	1590
AT4TE26550	232.874	-0.437139	0.173935	-2.51324	0.0119629	0.0496948	632
AT4TE48190	431.033	-0.438033	0.13171	-3.32574	0.000881847	0.00518833	1356
AT2TE47025	255.111	-0.438037	0.171036	-2.56108	0.0104348	0.0443248	1067
AT5TE63650	368.236	-0.43856	0.146249	-2.99872	0.00271117	0.0139216	1786
AT5TE20630	520.179	-0.439074	0.129399	-3.39319	0.000690844	0.0041784	5057
AT2TE24450	282.946	-0.439518	0.157605	-2.78873	0.00529156	0.0248783	983
AT2TE33290	260.295	-0.439941	0.170754	-2.57647	0.00998158	0.0427307	720
AT5TE39440	261.353	-0.440038	0.166199	-2.64765	0.00810526	0.0358943	2354
AT5TE36845	244.279	-0.440176	0.172143	-2.55703	0.010557	0.0447603	750
AT1TE44705	237.891	-0.441051	0.167701	-2.62999	0.00853869	0.0374928	965
AT1TE56135	1112.8	-0.441972	0.102669	-4.30481	1.67131e-05	0.00014187	3796
AT1TE53915	256.129	-0.442177	0.162876	-2.7148	0.00663159	0.0302177	1154
AT5TE34100	453.697	-0.442268	0.132242	-3.34437	0.000824683	0.00489005	3123
AT2TE22295	381.361	-0.442642	0.144542	-3.06238	0.00219584	0.0115881	1827
AT2TE29220	1133.67	-0.442982	0.0921525	-4.80705	1.53173e-06	1.52616e-05	3721
AT5TE37335	375.129	-0.444196	0.139712	-3.17937	0.00147596	0.00818408	1441
AT3TE44245	222.402	-0.44521	0.173658	-2.56372	0.0103558	0.0440338	1195
AT3TE54550	1608.88	-0.445437	0.0850966	-5.23448	1.6545e-07	1.88255e-06	4934
AT2TE44750	495.27	-0.446542	0.129076	-3.45952	0.000541132	0.00336855	1087
AT2TE10615	511.379	-0.446584	0.13294	-3.35929	0.000781438	0.00466525	1929
AT2TE04875	238.738	-0.447033	0.173969	-2.56961	0.0101813	0.0434543	656
AT4TE51405	308.009	-0.447199	0.153094	-2.92108	0.00348817	0.0173082	1691
AT1TE22695	249.341	-0.447944	0.176718	-2.53479	0.0112514	0.0472805	989
AT5TE54980	244.849	-0.448327	0.16898	-2.65314	0.0079747	0.0353924	3173
AT1TE52205	335.567	-0.449318	0.14816	-3.03265	0.00242418	0.0126307	1082
AT3TE63290	412.473	-0.449698	0.14309	-3.14277	0.00167358	0.00913082	1146
AT1TE21210	2541.99	-0.450289	0.0743066	-6.05989	1.36218e-09	1.94037e-08	5120
AT4TE34305	1646.28	-0.450574	0.0839593	-5.36657	8.0247e-08	9.50159e-07	4966
AT5TE30050	417.226	-0.45179	0.134423	-3.36096	0.000776732	0.00464053	1083
AT4TE28745	302.465	-0.452081	0.15194	-2.97538	0.00292622	0.0148698	649
AT3TE41915	267.935	-0.453332	0.165408	-2.74068	0.00613119	0.0282444	1257
AT3TE66935	601.84	-0.453361	0.124269	-3.64823	0.00026405	0.00176592	2480
AT2TE58200	404.629	-0.454156	0.136717	-3.32186	0.000894197	0.00525149	2088
AT3TE75575	575.897	-0.45509	0.125217	-3.6344	0.000278625	0.00185314	2874
AT4TE22180	1347.24	-0.457104	0.0864503	-5.28748	1.24015e-07	1.43371e-06	5122
AT1TE14315	2302.89	-0.458677	0.0882953	-5.19481	2.04932e-07	2.30815e-06	5123
AT5TE36720	1088.41	-0.458813	0.0925289	-4.95859	7.10052e-07	7.42944e-06	5456
AT1TE73190	521.161	-0.458892	0.121768	-3.76857	0.000164187	0.00114687	1303
AT2TE10255	301.106	-0.459322	0.152761	-3.0068	0.00264014	0.013613	1319
AT2TE12475	211.882	-0.459507	0.179395	-2.56143	0.0104242	0.0442874	2588
AT1TE45570	226.707	-0.460658	0.175535	-2.62432	0.00868234	0.0380159	805
AT1TE28390	377.823	-0.461258	0.140554	-3.28171	0.0010318	0.00595432	235
AT1TE28380	737.398	-0.461594	0.108631	-4.24919	2.1455e-05	0.000178293	834
AT3TE59040	229.45	-0.461809	0.170581	-2.70727	0.00678388	0.0307888	1295
AT4TE19585	291.221	-0.46224	0.160476	-2.88043	0.0039713	0.0194358	1476
AT3TE51385	384.85	-0.462706	0.137033	-3.3766	0.000733871	0.00441267	1061
AT4TE04905	285.654	-0.462845	0.160115	-2.89071	0.00384375	0.0188699	1324
AT3TE52590	205.211	-0.46373	0.182196	-2.54523	0.0109205	0.0461161	2599
AT4TE88425	253.528	-0.463825	0.164218	-2.82445	0.0047362	0.0226139	1982
AT5TE50750	241.783	-0.464031	0.178424	-2.60072	0.00930276	0.0402862	1069
AT1TE11110	301.194	-0.465169	0.151493	-3.07057	0.00213649	0.0113097	1340
AT2TE29730	976.788	-0.465325	0.104805	-4.43991	8.99975e-06	7.99438e-05	2708
AT1TE30875	281.721	-0.465372	0.160543	-2.89874	0.0037466	0.018437	995
AT1TE51675	291.855	-0.466336	0.165512	-2.81754	0.00483931	0.0230446	1554
AT1TE41500	227.278	-0.466988	0.174315	-2.67898	0.00738459	0.0331275	676
AT5TE37975	1516.6	-0.467085	0.0904259	-5.16539	2.39934e-07	2.67744e-06	5144
AT1TE27905	449.124	-0.467689	0.136949	-3.41507	0.000637658	0.00389338	1265
AT3TE49905	212.479	-0.467725	0.177019	-2.64223	0.00823624	0.0363917	694
AT3TE79695	546.387	-0.467755	0.120891	-3.86923	0.000109181	0.00079133	2063
AT3TE63180	1291.55	-0.467893	0.088486	-5.28777	1.23818e-07	1.43183e-06	4365
AT3TE69815	235.819	-0.469129	0.170529	-2.75103	0.00594082	0.0274938	1185
AT1TE56835	258.497	-0.470049	0.173761	-2.70515	0.00682736	0.0309588	1119
AT2TE74725	289.86	-0.470123	0.154035	-3.05205	0.00227282	0.0119483	1056
AT4TE26270	492.862	-0.470439	0.127311	-3.69518	0.000219728	0.00149652	2246
AT2TE20755	257.082	-0.470455	0.172903	-2.72092	0.00651005	0.0297365	1211
AT1TE78720	2602.02	-0.470835	0.0773677	-6.08568	1.15998e-09	1.6662e-08	5315
AT5TE31945	189.611	-0.471147	0.185524	-2.53955	0.0110996	0.0467429	1308
AT5TE47880	439.771	-0.472123	0.129922	-3.6339	0.000279174	0.00185589	2316
AT2TE22150	204.478	-0.472158	0.182003	-2.59422	0.00948046	0.0409436	1862
AT4TE17975	207.982	-0.473203	0.182034	-2.59952	0.00933536	0.0403975	2060
AT3TE62750	255.937	-0.473812	0.164094	-2.88744	0.00388394	0.0190438	2467
AT4TE09825	741.717	-0.475552	0.111245	-4.27482	1.91292e-05	0.000160556	3511
AT2TE27905	300.728	-0.475897	0.16191	-2.93927	0.00328983	0.0164672	2789
AT1TE57695	259.712	-0.475942	0.16264	-2.92635	0.00342968	0.0170633	1142
AT2TE37380	373.627	-0.476135	0.138438	-3.43933	0.000583156	0.00359747	1747
AT4TE22040	251.763	-0.476401	0.188612	-2.52582	0.0115428	0.0482125	1242
AT3TE65480	275.087	-0.476609	0.159654	-2.98527	0.00283327	0.0144654	470
AT2TE23415	445.978	-0.476995	0.140047	-3.40596	0.000659317	0.00400757	1758
AT1TE65060	2410.08	-0.477016	0.0788469	-6.04991	1.44928e-09	2.06088e-08	4804
AT3TE62360	516.033	-0.477066	0.122873	-3.88258	0.000103353	0.000754141	2800
AT2TE27275	227.434	-0.477643	0.172225	-2.77336	0.00554807	0.0259153	2483
AT5TE37190	261.297	-0.478148	0.161907	-2.95323	0.00314463	0.0158423	920
AT5TE52075	564.361	-0.479262	0.118197	-4.05477	5.01834e-05	0.000391246	4871
AT1TE74615	490.308	-0.479356	0.123901	-3.86887	0.00010934	0.000792337	6486
AT3TE62245	324.184	-0.479476	0.148509	-3.22861	0.00124395	0.00702808	1231
AT3TE64915	890.647	-0.479578	0.101033	-4.74672	2.06737e-06	2.02164e-05	2135
AT3TE51460	3981.17	-0.480121	0.0679805	-7.06263	1.63385e-12	2.95112e-11	10152
AT5TE49950	224.924	-0.480572	0.173228	-2.77421	0.00553357	0.0258581	2316
AT4TE23110	242.744	-0.48181	0.172037	-2.80062	0.00510048	0.0241088	889
AT5TE46945	216.907	-0.48292	0.184759	-2.61378	0.00895473	0.0390422	2466
AT1TE43960	328.825	-0.483036	0.147808	-3.268	0.00108311	0.00621531	2034
AT5TE44540	343.336	-0.483124	0.154524	-3.12653	0.00176882	0.00959062	1336
AT5TE82430	2300.23	-0.485151	0.080762	-6.00717	1.88789e-09	2.65247e-08	5112
AT1TE52845	281.856	-0.485567	0.156324	-3.10616	0.00189535	0.0102044	2043
AT2TE11840	306.798	-0.486528	0.156051	-3.11775	0.00182239	0.00985119	2655
AT3TE76585	637.274	-0.486886	0.112481	-4.32862	1.50045e-05	0.000128027	1390
AT1TE37265	1156.21	-0.487144	0.0917478	-5.3096	1.09866e-07	1.27695e-06	3405
AT5TE71740	180.245	-0.487234	0.190867	-2.55275	0.0106877	0.0452401	1307
AT2TE65130	183.293	-0.487571	0.192226	-2.53644	0.0111985	0.0470968	1216
AT1TE55255	295.765	-0.489338	0.155063	-3.15573	0.00160097	0.00879775	2451
AT4TE43250	2030.04	-0.491612	0.0829542	-5.92631	3.09824e-09	4.25129e-08	5104
AT5TE46655	237.542	-0.492766	0.173661	-2.83753	0.00454646	0.021827	1103
AT1TE42465	515.082	-0.493004	0.122244	-4.03294	5.5083e-05	0.000426453	1255
AT3TE76580	762.901	-0.493294	0.105226	-4.68795	2.75959e-06	2.64014e-05	1902
AT1TE52605	216.094	-0.493307	0.176198	-2.79972	0.00511467	0.0241599	1668
AT5TE52485	193.625	-0.493954	0.191382	-2.58099	0.0098518	0.0422893	1290
AT1TE61640	380.646	-0.494055	0.13761	-3.59026	0.00033035	0.0021615	1122
AT3TE82240	414.037	-0.494414	0.13419	-3.68442	0.000229223	0.00155245	1087
AT3TE58780	232.046	-0.495939	0.170184	-2.91413	0.00356682	0.0176516	1243
AT5TE14155	321.998	-0.49617	0.154083	-3.22016	0.0012812	0.00721215	1139
AT4TE01930	197.536	-0.497051	0.187749	-2.64742	0.00811091	0.0359116	2180
AT2TE20975	221.764	-0.499095	0.175251	-2.84789	0.00440102	0.021218	2240
AT4TE08265	190.381	-0.499102	0.188128	-2.65299	0.00797811	0.0354037	1184
AT3TE62255	221.122	-0.50047	0.174045	-2.87552	0.00403358	0.019696	602
AT2TE04085	1662.26	-0.500669	0.0837212	-5.98019	2.22873e-09	3.11537e-08	4607
AT1TE64055	314.232	-0.500957	0.155163	-3.22858	0.00124406	0.00702808	2714
AT2TE09410	194.126	-0.501105	0.191257	-2.62006	0.0087915	0.0384202	821
AT2TE78030	175.715	-0.501523	0.193193	-2.59597	0.00943239	0.0407659	2171
AT1TE01405	448.318	-0.501821	0.137338	-3.65392	0.000258266	0.00172921	842
AT4TE09910	271.88	-0.502732	0.160586	-3.13061	0.00174443	0.00946966	2392
AT3TE46790	197.895	-0.50335	0.182751	-2.7543	0.00588179	0.0272482	968
AT2TE10115	419.546	-0.504043	0.143602	-3.51	0.000448106	0.002849	865
AT5TE36410	430.019	-0.504317	0.132531	-3.80527	0.000141647	0.0010045	959
AT1TE53665	563.013	-0.504496	0.118677	-4.25098	2.12833e-05	0.000177116	1674
AT1TE01615	559.546	-0.504685	0.12164	-4.14901	3.33922e-05	0.000269062	2236
AT1TE06480	331.797	-0.505599	0.147245	-3.43372	0.000595352	0.00366282	1064
AT1TE94305	273.978	-0.505792	0.173575	-2.91396	0.00356873	0.0176526	1819
AT2TE24460	749.928	-0.506494	0.113283	-4.47105	7.78361e-06	6.99572e-05	2999
AT3TE67290	164.684	-0.507518	0.197467	-2.57014	0.0101657	0.0434014	647
AT2TE08160	220.479	-0.507526	0.178547	-2.84254	0.00447559	0.0215493	1409
AT5TE21630	273.171	-0.507817	0.160417	-3.16561	0.00154757	0.00853736	1374
AT4TE21315	297.375	-0.508759	0.152456	-3.3371	0.00084659	0.00500911	1577
AT2TE22485	253.96	-0.50986	0.164399	-3.10135	0.00192642	0.0103401	804
AT2TE23240	400.615	-0.510001	0.152193	-3.35102	0.000805138	0.00478866	1111
AT5TE38075	377.465	-0.510242	0.138459	-3.68514	0.000228576	0.00154857	2243
AT2TE78945	508.499	-0.511061	0.129597	-3.94346	8.03159e-05	0.000601831	1860
AT3TE64425	334.108	-0.511279	0.150314	-3.40141	0.00067039	0.00406606	639
AT3TE49895	219.261	-0.511345	0.1784	-2.86629	0.00415315	0.0201935	1070
AT1TE63170	468.513	-0.511667	0.129646	-3.94665	7.92528e-05	0.000594758	3324
AT3TE47980	201.628	-0.511743	0.199087	-2.57044	0.0101569	0.0433682	621
AT5TE35705	187.207	-0.512309	0.18893	-2.71164	0.00669512	0.0304499	649
AT2TE52165	378.007	-0.512613	0.141599	-3.62018	0.000294403	0.00194424	1471
AT5TE50615	223.566	-0.512753	0.173175	-2.96089	0.00306749	0.015492	520
AT2TE77795	179.415	-0.512877	0.190629	-2.69044	0.0071358	0.0321659	669
AT5TE39495	169.561	-0.513285	0.200853	-2.55553	0.0106027	0.0449073	1981
AT3TE44975	263.993	-0.513405	0.170844	-3.00511	0.00265485	0.0136683	2633
AT4TE25005	618.823	-0.513949	0.117648	-4.36855	1.25075e-05	0.000108569	1153
AT4TE34735	362.74	-0.514283	0.14952	-3.43956	0.000582667	0.00359553	1704
AT2TE88480	168.784	-0.514723	0.196258	-2.62269	0.00872389	0.0381653	1102
AT3TE48580	238.059	-0.515146	0.16944	-3.04029	0.0023635	0.0123555	1599
AT3TE47210	223.265	-0.515252	0.175087	-2.94284	0.00325215	0.0163024	570
AT1TE63790	231.225	-0.515906	0.17386	-2.96737	0.00300356	0.0152177	1434
AT3TE05790	165.406	-0.516247	0.199383	-2.58922	0.00961929	0.0414362	1291
AT2TE33015	536.698	-0.516585	0.12247	-4.21805	2.46419e-05	0.000202687	1754
AT1TE29575	159.003	-0.51711	0.201455	-2.56688	0.010262	0.0436853	541
AT3TE63950	1451.33	-0.517168	0.0915323	-5.65011	1.60344e-08	2.05286e-07	3674
AT1TE27830	161.797	-0.517473	0.205408	-2.51925	0.0117605	0.0490089	1369
AT2TE23505	316.617	-0.51843	0.151527	-3.42137	0.000623059	0.0038133	1187
AT2TE10705	189.773	-0.518592	0.190137	-2.72747	0.0063822	0.0292598	980
AT5TE47275	232.046	-0.518739	0.17004	-3.05068	0.00228323	0.0119953	1824
AT2TE65785	164.94	-0.519074	0.202228	-2.56677	0.0102651	0.0436894	1185
AT2TE26310	219.88	-0.519361	0.174723	-2.97248	0.00295403	0.0149926	1548
AT5TE38945	431.279	-0.519979	0.135736	-3.8308	0.000127726	0.00091382	4029
AT2TE25110	299.7	-0.520454	0.154845	-3.36112	0.000776259	0.00463955	1132
AT5TE50245	296.689	-0.520646	0.152655	-3.4106	0.000648195	0.00394775	2070
AT1TE43640	217.298	-0.521771	0.174677	-2.98706	0.00281676	0.0143937	1639
AT2TE55980	358.462	-0.521984	0.141628	-3.68559	0.000228171	0.00154711	3100
AT5TE49620	192.499	-0.522066	0.195198	-2.67455	0.007483	0.0335214	1685
AT1TE30880	163.004	-0.522203	0.204057	-2.5591	0.0104943	0.0445315	1653
AT2TE12465	246.942	-0.522255	0.170719	-3.05915	0.00221967	0.0116973	924
AT5TE54320	211.71	-0.522278	0.17854	-2.92526	0.00344165	0.0171187	2604
AT5TE54450	360.031	-0.52231	0.141458	-3.69232	0.000222219	0.00151148	2477
AT4TE23215	150.645	-0.522517	0.206762	-2.52714	0.0114996	0.0480681	2658
AT3TE46510	181.622	-0.523448	0.190257	-2.75127	0.0059365	0.0274799	801
AT5TE27155	294.467	-0.523558	0.159833	-3.27566	0.00105417	0.00606366	2129
AT5TE48555	282.174	-0.523869	0.160378	-3.26646	0.00108901	0.00624222	835
AT5TE47875	646.361	-0.523904	0.111359	-4.70466	2.54288e-06	2.44934e-05	3770
AT2TE42940	306.72	-0.525094	0.154461	-3.39954	0.000675001	0.00409101	3733
AT3TE50325	340.48	-0.525799	0.148986	-3.52917	0.000416857	0.00266932	1203
AT4TE49845	189.606	-0.525919	0.187473	-2.80531	0.00502686	0.0238054	907
AT4TE05105	350.733	-0.526373	0.148547	-3.54349	0.000394873	0.00253861	2091
AT3TE84550	531.615	-0.526375	0.122553	-4.29509	1.74625e-05	0.000147773	2132
AT4TE23940	246.781	-0.526464	0.178178	-2.95471	0.0031296	0.0157824	3939
AT5TE93845	365.265	-0.527308	0.144191	-3.65701	0.000255177	0.00171047	1044
AT5TE10990	265.407	-0.527471	0.164357	-3.2093	0.00133059	0.00746254	1505
AT2TE27170	191.272	-0.527602	0.18501	-2.85174	0.00434802	0.020997	1249
AT3TE39545	328.997	-0.528616	0.166011	-3.18423	0.00145142	0.00806214	734
AT5TE47270	306.265	-0.528648	0.154396	-3.42398	0.000617116	0.00378425	2425
AT3TE46565	439.325	-0.528724	0.130419	-4.05404	5.03415e-05	0.000392241	1934
AT5TE15610	526.368	-0.528786	0.122011	-4.33392	1.46477e-05	0.000125268	3542
AT5TE61485	302.902	-0.52942	0.153364	-3.45205	0.000556347	0.00345073	1352
AT1TE60665	506.52	-0.529703	0.126542	-4.186	2.83918e-05	0.000231814	1675
AT2TE08300	334.555	-0.529769	0.145939	-3.63008	0.000283334	0.00187899	1735
AT5TE22990	1205.7	-0.530067	0.0931569	-5.69005	1.27e-08	1.6496e-07	2618
AT2TE09955	664.047	-0.530279	0.111326	-4.76328	1.90472e-06	1.8697e-05	3447
AT3TE62720	213.334	-0.532165	0.178867	-2.97521	0.00292791	0.0148747	1150
AT2TE09395	185.783	-0.53217	0.191359	-2.78101	0.00541904	0.0253964	1142
AT4TE23815	289.646	-0.533102	0.155048	-3.43829	0.000585399	0.00360968	917
AT5TE67885	280.513	-0.533347	0.166405	-3.20511	0.00135012	0.00756074	2565
AT3TE50020	225.609	-0.533564	0.172268	-3.09728	0.00195305	0.0104667	1003
AT5TE81100	157.166	-0.533776	0.201404	-2.65027	0.0080427	0.0356557	767
AT3TE25425	218.605	-0.535314	0.177936	-3.00847	0.00262565	0.0135501	2695
AT3TE43460	1147.23	-0.535343	0.09783	-5.47218	4.44533e-08	5.42439e-07	2056
AT4TE30415	149.302	-0.53539	0.207567	-2.57936	0.00989844	0.0424499	430
AT1TE55520	219.316	-0.535886	0.174104	-3.07797	0.00208416	0.0110783	446
AT1TE63140	183.469	-0.53688	0.192859	-2.7838	0.00537264	0.0252134	1681
AT4TE19545	186.346	-0.53759	0.188675	-2.84929	0.00438173	0.0211349	1238
AT1TE41850	392.744	-0.537935	0.13748	-3.91283	9.1222e-05	0.000675701	1015
AT4TE05590	196.485	-0.538965	0.183259	-2.941	0.0032715	0.0163794	949
AT3TE49325	154.669	-0.539123	0.204589	-2.63516	0.00840984	0.0370318	816
AT3TE51515	169.858	-0.539523	0.200736	-2.68772	0.0071941	0.0323931	1220
AT4TE38980	292.16	-0.539664	0.162185	-3.32746	0.000876422	0.005161	2119
AT1TE40770	141.04	-0.539897	0.214523	-2.51674	0.0118447	0.0492951	928
AT1TE58335	138.053	-0.539908	0.214172	-2.5209	0.0117054	0.0487993	554
AT3TE48410	160.631	-0.540259	0.203375	-2.65646	0.00789647	0.0350907	523
AT2TE39490	186.741	-0.540506	0.194295	-2.78188	0.00540446	0.0253424	1201
AT5TE40500	154.128	-0.541255	0.206285	-2.62383	0.00869483	0.0380624	1057
AT4TE19610	172.807	-0.541488	0.203082	-2.66635	0.00766803	0.0341938	2340
AT1TE59415	330.475	-0.542086	0.146745	-3.69406	0.000220705	0.00150243	2691
AT3TE22595	246.832	-0.542229	0.170294	-3.18407	0.00145219	0.00806535	1421
AT1TE39400	135.378	-0.542666	0.21564	-2.51654	0.0118514	0.0493029	160
AT1TE43380	204.844	-0.542839	0.182054	-2.98175	0.00286611	0.0146204	630
AT5TE61710	190.339	-0.543159	0.185469	-2.92857	0.00340531	0.0169626	440
AT3TE65520	273.595	-0.544374	0.158411	-3.43646	0.000589371	0.00362982	1324
AT5TE18905	156.385	-0.544379	0.202838	-2.68382	0.00727873	0.0326919	322
AT4TE05825	192.64	-0.544646	0.18481	-2.94707	0.00320804	0.0161147	1457
AT1TE40120	370.674	-0.544656	0.141934	-3.8374	0.000124346	0.000890878	4861
AT1TE20745	139.23	-0.545136	0.215683	-2.52748	0.0114883	0.0480403	786
AT5TE49755	3362.43	-0.545497	0.0695127	-7.84744	4.2461e-15	9.21631e-14	7966
AT4TE32185	550.404	-0.545812	0.120381	-4.53404	5.78657e-06	5.29223e-05	1422
AT2TE11635	139.954	-0.546042	0.213645	-2.55584	0.0105933	0.0448775	1000
AT5TE56775	138.468	-0.54615	0.213559	-2.55737	0.0105467	0.0447213	520
AT1TE62140	143.642	-0.546308	0.213151	-2.56301	0.010377	0.0441159	995
AT1TE72170	288.301	-0.546317	0.155805	-3.50641	0.000454194	0.00288459	988
AT3TE63895	221.097	-0.546331	0.180853	-3.02085	0.00252065	0.0130723	459
AT5TE54185	398.744	-0.546376	0.144162	-3.79001	0.000150641	0.0010606	1087
AT5TE63560	205.426	-0.546795	0.191003	-2.86276	0.00419973	0.0203862	1357
AT4TE28740	153.053	-0.547123	0.205028	-2.66852	0.0076186	0.0340177	246
AT3TE45810	339.256	-0.547315	0.146874	-3.72644	0.000194205	0.00133866	950
AT2TE25530	316.974	-0.547996	0.157059	-3.4891	0.000484653	0.00305819	691
AT4TE34740	196.102	-0.548084	0.194195	-2.82234	0.0047674	0.0227311	595
AT5TE47415	141.53	-0.548467	0.212267	-2.58386	0.00977011	0.0419756	451
AT3TE51450	375.803	-0.549246	0.148481	-3.69909	0.000216375	0.00147687	1234
AT3TE58535	220.785	-0.550134	0.182093	-3.02118	0.00251794	0.0130615	389
AT3TE50720	181.496	-0.551022	0.18944	-2.90869	0.00362944	0.0179292	1680
AT1TE51435	252.602	-0.551525	0.164475	-3.35324	0.000798717	0.0047546	1209
AT1TE37275	215.085	-0.552022	0.179879	-3.06886	0.0021488	0.0113646	1790
AT2TE10105	661.332	-0.552401	0.111625	-4.94873	7.46983e-07	7.78021e-06	1799
AT3TE50410	276.768	-0.55257	0.157914	-3.49918	0.000466698	0.00295441	876
AT1TE42880	199.895	-0.552595	0.183551	-3.01059	0.0026074	0.0134729	1613
AT3TE65460	238.274	-0.552674	0.168501	-3.27995	0.00103826	0.00598385	1651
AT5TE18885	326.811	-0.55317	0.147437	-3.75192	0.000175489	0.00122029	653
AT1TE46030	337.354	-0.553533	0.150383	-3.68082	0.000232485	0.00157247	2964
AT2TE22140	133.966	-0.554303	0.219716	-2.52282	0.0116418	0.0485733	635
AT3TE47370	272.736	-0.554619	0.160613	-3.45314	0.000554096	0.00343884	1327
AT2TE54860	157.207	-0.555445	0.204132	-2.72102	0.00650816	0.0297311	571
AT3TE65930	242.38	-0.555465	0.174866	-3.17651	0.00149057	0.0082495	1600
AT3TE65715	213.867	-0.556508	0.177689	-3.13193	0.0017366	0.00943087	2861
AT2TE01630	357.306	-0.556654	0.143725	-3.87304	0.000107486	0.000780974	3265
AT5TE37930	133.979	-0.556756	0.216409	-2.5727	0.0100909	0.043118	2526
AT1TE41585	204.506	-0.557249	0.18292	-3.04641	0.00231594	0.0121486	1178
AT3TE45045	172.537	-0.55728	0.193858	-2.87468	0.00404441	0.0197419	2591
AT1TE35250	257.869	-0.5574	0.167999	-3.31788	0.000907019	0.00531616	974
AT3TE40535	158.815	-0.558017	0.205972	-2.70919	0.00674484	0.0306277	543
AT1TE54310	180.095	-0.558712	0.194292	-2.87562	0.00403232	0.0196922	919
AT3TE67640	180.963	-0.558819	0.201159	-2.778	0.00546949	0.0256094	507
AT2TE06950	141.461	-0.55901	0.213732	-2.61546	0.00891061	0.0388911	1232
AT1TE58685	223.881	-0.559772	0.177897	-3.14661	0.00165176	0.00903458	717
AT5TE57230	285.692	-0.55987	0.157693	-3.55037	0.000384688	0.00248159	660
AT1TE71790	139.346	-0.559975	0.215636	-2.59686	0.00940815	0.040674	826
AT1TE57045	176.394	-0.560421	0.194468	-2.88182	0.00395385	0.0193573	935
AT5TE31950	132.738	-0.560694	0.218938	-2.56097	0.010438	0.0443337	968
AT1TE45120	203.539	-0.561318	0.182222	-3.0804	0.0020672	0.0110124	1496
AT2TE29090	151.039	-0.561967	0.205636	-2.73282	0.00627941	0.0288367	1888
AT4TE25580	230.454	-0.562107	0.17175	-3.27281	0.00106482	0.0061198	1329
AT5TE55500	220.355	-0.562208	0.174884	-3.21474	0.00130563	0.00733157	1186
AT1TE46620	132.858	-0.562302	0.218853	-2.56931	0.0101902	0.0434788	500
AT2TE63775	198.502	-0.56248	0.191676	-2.93454	0.00334044	0.0166941	430
AT5TE24020	163.685	-0.563112	0.207518	-2.71355	0.00665663	0.0303016	279
AT3TE36040	127.127	-0.563185	0.223317	-2.5219	0.0116722	0.0486807	1706
AT4TE10285	159.177	-0.5634	0.201355	-2.79805	0.00514127	0.0242633	1970
AT1TE42630	291.971	-0.563547	0.155608	-3.62157	0.000292816	0.00193531	1504
AT3TE49510	198.568	-0.563853	0.182083	-3.09669	0.00195694	0.0104834	1462
AT2TE32755	184.844	-0.563892	0.192156	-2.93456	0.00334026	0.0166941	768
AT3TE70130	541.637	-0.564248	0.123995	-4.55057	5.35015e-06	4.90401e-05	2437
AT2TE29340	681.201	-0.565928	0.110236	-5.13379	2.83961e-07	3.13555e-06	1963
AT5TE38955	228.791	-0.566709	0.171732	-3.29996	0.000966989	0.00562196	1441
AT4TE23105	388.138	-0.566872	0.144201	-3.93113	8.45462e-05	0.0006316	1976
AT3TE70410	2127.13	-0.56699	0.0838119	-6.76503	1.33279e-11	2.25291e-10	5087
AT2TE20710	245.902	-0.567851	0.172591	-3.29016	0.00100131	0.00580016	828
AT3TE54245	303.388	-0.568104	0.151597	-3.74746	0.000178637	0.00123987	2779
AT2TE52670	413.096	-0.568299	0.134854	-4.21417	2.50694e-05	0.000205915	2534
AT5TE38875	326.15	-0.568438	0.148589	-3.82558	0.000130464	0.000931786	3136
AT1TE78560	147.226	-0.56923	0.213214	-2.66976	0.00759062	0.0339071	1613
AT1TE57015	167.058	-0.569925	0.202748	-2.811	0.00493876	0.0234421	787
AT5TE47895	1159.98	-0.57079	0.0922695	-6.18612	6.16634e-10	9.09574e-09	11095
AT5TE20980	178.795	-0.571554	0.191997	-2.97689	0.00291193	0.0148192	839
AT5TE59135	219.688	-0.571713	0.176309	-3.24268	0.00118409	0.00673092	2123
AT2TE30980	369.123	-0.572195	0.149262	-3.83348	0.000126343	0.000904397	1288
AT5TE47390	216.182	-0.572265	0.177097	-3.23136	0.00123203	0.00696683	604
AT2TE07460	913.83	-0.57227	0.103508	-5.52878	3.2247e-08	3.9858e-07	3982
AT1TE93910	123.851	-0.572291	0.227213	-2.51875	0.0117773	0.0490692	250
AT4TE30490	273.373	-0.572374	0.162276	-3.52718	0.000420015	0.00268661	1697
AT2TE28270	275.411	-0.572393	0.162359	-3.52547	0.000422724	0.00270183	831
AT2TE21010	215.373	-0.572443	0.179481	-3.18944	0.0014255	0.00793426	1534
AT1TE36960	126.815	-0.572712	0.224964	-2.5458	0.0109028	0.0460556	710
AT4TE10720	257.987	-0.572795	0.16447	-3.48268	0.000496423	0.00312526	2471
AT2TE09170	165.63	-0.573189	0.198121	-2.89313	0.00381424	0.018734	1294
AT1TE31590	428.624	-0.573328	0.133372	-4.29871	1.71795e-05	0.000145498	2855
AT1TE27810	288.644	-0.573502	0.159631	-3.59268	0.000327292	0.00214285	3353
AT4TE25785	263.387	-0.57477	0.164778	-3.48815	0.000486384	0.00306723	847
AT3TE65015	762.253	-0.574786	0.107179	-5.36288	8.19066e-08	9.68849e-07	2940
AT2TE03875	293.55	-0.57486	0.161924	-3.55019	0.000384955	0.00248282	2049
AT5TE68735	143.933	-0.575047	0.212221	-2.70966	0.00673518	0.0305881	823
AT4TE32060	1919.6	-0.575103	0.0857823	-6.70421	2.02498e-11	3.3717e-10	5144
AT1TE62220	177.472	-0.575154	0.193261	-2.97604	0.00291994	0.0148489	2486
AT3TE48670	127.75	-0.575159	0.226584	-2.53839	0.0111363	0.0468833	329
AT5TE28285	129.333	-0.575458	0.226322	-2.54265	0.0110014	0.0464006	1016
AT5TE38330	146.047	-0.575818	0.210278	-2.73836	0.00617461	0.0283999	841
AT1TE58825	278.123	-0.575931	0.159466	-3.61162	0.000304285	0.00200403	1260
AT3TE48060	397.625	-0.576161	0.137654	-4.18556	2.84465e-05	0.000232169	4579
AT2TE41180	627.162	-0.576626	0.116042	-4.96914	6.7252e-07	7.07092e-06	1087
AT1TE43240	146.82	-0.576927	0.214257	-2.69269	0.00708786	0.0319708	834
AT5TE39010	133.054	-0.578209	0.219495	-2.63427	0.00843182	0.0371127	1094
AT5TE29485	129.395	-0.578796	0.223513	-2.58954	0.00961038	0.0414089	632
AT1TE42875	583.744	-0.579274	0.116557	-4.9699	6.69883e-07	7.045e-06	901
AT4TE21910	400.348	-0.579656	0.135639	-4.27352	1.92411e-05	0.00016133	1267
AT2TE28370	229.202	-0.579747	0.17232	-3.36436	0.000767202	0.0045916	1244
AT3TE70585	315.328	-0.580731	0.149658	-3.8804	0.000104285	0.000759463	228
AT2TE24400	259.638	-0.580756	0.165504	-3.50901	0.000449772	0.00285871	530
AT5TE93020	121.391	-0.580834	0.22681	-2.56089	0.0104405	0.0443396	777
AT3TE29360	197.169	-0.581252	0.184088	-3.15746	0.00159147	0.00875257	1712
AT5TE50145	120.772	-0.58142	0.227847	-2.5518	0.0107167	0.0453443	647
AT4TE09755	241.931	-0.581438	0.167111	-3.47936	0.000502606	0.00315694	1284
AT2TE24245	195.689	-0.582307	0.183302	-3.17676	0.0014893	0.00824471	1149
AT1TE42920	188.511	-0.58271	0.188927	-3.08431	0.00204026	0.0108802	625
AT4TE08140	117.08	-0.582939	0.231517	-2.51791	0.0118054	0.0491662	545
AT4TE01640	328.936	-0.583803	0.147556	-3.95648	7.60626e-05	0.000573224	967
AT3TE47260	329.095	-0.584542	0.147252	-3.96967	7.19737e-05	0.000544405	2768
AT5TE37060	203.261	-0.584829	0.180565	-3.23889	0.00119996	0.00680606	3358
AT3TE65635	138.149	-0.585104	0.22772	-2.5694	0.0101876	0.0434769	1221
AT3TE51695	183.444	-0.585164	0.18849	-3.10448	0.00190614	0.0102554	817
AT5TE52440	188.758	-0.585535	0.189608	-3.08814	0.00201412	0.0107561	387
AT4TE52320	265.209	-0.585895	0.165717	-3.5355	0.000406997	0.00261228	515
AT2TE52900	137.851	-0.585943	0.215109	-2.72394	0.00645084	0.0295218	1113
AT2TE24760	207.79	-0.585981	0.178481	-3.28315	0.00102653	0.00592955	2814
AT4TE29955	156.985	-0.586066	0.202774	-2.89024	0.00384944	0.0188928	606
AT1TE58650	176.239	-0.586561	0.192665	-3.04446	0.00233102	0.0122164	1220
AT2TE75960	263.854	-0.5868	0.161582	-3.63158	0.000281692	0.00186931	1549
AT2TE10595	202.82	-0.586967	0.186745	-3.14315	0.00167141	0.00912145	905
AT5TE17955	127.74	-0.587236	0.225156	-2.60813	0.00910381	0.0395956	760
AT1TE24855	163.186	-0.587505	0.203962	-2.88046	0.003971	0.0194358	620
AT2TE10265	332.376	-0.588218	0.151585	-3.88045	0.000104264	0.000759442	1228
AT5TE08535	270.666	-0.588525	0.159537	-3.68896	0.000225175	0.00152932	917
AT5TE96655	138.9	-0.588573	0.220011	-2.6752	0.00746847	0.0334709	1599
AT2TE11645	257.4	-0.588723	0.162697	-3.61853	0.000296286	0.00195605	716
AT2TE42460	486.031	-0.588735	0.128314	-4.58824	4.46991e-06	4.14056e-05	894
AT3TE79270	124.046	-0.588948	0.224147	-2.62751	0.00860135	0.0377537	981
AT3TE50455	238.526	-0.588989	0.174857	-3.3684	0.000756045	0.00453444	2382
AT3TE50110	129.308	-0.589013	0.222463	-2.64769	0.00810441	0.0358943	345
AT4TE12750	240.09	-0.589415	0.176652	-3.33659	0.00084813	0.00501678	1312
AT4TE56065	124.939	-0.589878	0.227684	-2.59078	0.00957598	0.041291	955
AT3TE50860	398.451	-0.590682	0.135747	-4.35134	1.35306e-05	0.000116517	1842
AT2TE28205	696.667	-0.590921	0.111823	-5.28445	1.26085e-07	1.45682e-06	3528
AT1TE55765	175.262	-0.591152	0.198497	-2.97814	0.00290001	0.0147603	1776
AT1TE40240	400.29	-0.59201	0.139233	-4.25193	2.11932e-05	0.000176403	3044
AT5TE37165	461.335	-0.592132	0.127518	-4.64352	3.42525e-06	3.22889e-05	1402
AT2TE09720	161.919	-0.592965	0.199214	-2.97652	0.00291537	0.0148348	960
AT4TE50260	300.238	-0.593182	0.162958	-3.64009	0.000272538	0.00181589	2160
AT5TE47890	123.511	-0.593376	0.22699	-2.61411	0.008946	0.0390083	1771
AT1TE82640	203.221	-0.593482	0.18731	-3.16845	0.00153253	0.00846313	2021
AT5TE51845	534.912	-0.593997	0.12058	-4.92615	8.38678e-07	8.6759e-06	4871
AT1TE44625	147.23	-0.594243	0.208538	-2.84956	0.00437799	0.0211213	618
AT1TE38090	1189.53	-0.594731	0.0911191	-6.52696	6.71169e-11	1.0757e-09	2816
AT1TE81825	317.998	-0.59519	0.149494	-3.98135	6.8525e-05	0.00052011	1385
AT3TE11080	227.833	-0.595222	0.173246	-3.4357	0.000591016	0.00363831	1144
AT3TE47840	167.231	-0.595703	0.204707	-2.91003	0.00361393	0.0178589	420
AT2TE23655	289.598	-0.595915	0.165382	-3.60326	0.000314248	0.00206402	873
AT1TE43845	301.044	-0.596147	0.152109	-3.91922	8.88364e-05	0.00066017	1863
AT5TE71350	167.295	-0.596351	0.197403	-3.02098	0.00251954	0.0130682	941
AT1TE53825	559.313	-0.597299	0.11859	-5.03668	4.73673e-07	5.08425e-06	3534
AT2TE61325	393.763	-0.59759	0.137581	-4.34355	1.40199e-05	0.000120367	2440
AT3TE47925	525.312	-0.597697	0.121857	-4.90493	9.34616e-07	9.61273e-06	1859
AT4TE36590	165.3	-0.597899	0.200095	-2.98808	0.00280735	0.0143545	1090
AT3TE62670	365.137	-0.598009	0.149015	-4.01309	5.9928e-05	0.000460924	3280
AT4TE22825	143.081	-0.598105	0.211007	-2.83453	0.00458939	0.02201	2192
AT1TE78765	135.081	-0.598779	0.21999	-2.72184	0.00649196	0.0296703	1030
AT5TE38510	194.882	-0.598933	0.1836	-3.26216	0.00110569	0.00632722	1283
AT5TE34040	1255.37	-0.598988	0.0898714	-6.66494	2.64765e-11	4.38183e-10	4305
AT5TE88075	321.463	-0.599344	0.149516	-4.00856	6.10898e-05	0.000469158	1391
AT3TE16695	166.876	-0.599491	0.198956	-3.01319	0.00258518	0.0133765	1164
AT5TE37300	232.748	-0.599509	0.172034	-3.48483	0.000492442	0.00310305	1094
AT3TE20240	172.283	-0.599903	0.20383	-2.94315	0.00324892	0.0162922	1003
AT2TE04090	141.782	-0.600268	0.216221	-2.77617	0.00550027	0.0257272	951
AT1TE71755	236.665	-0.600906	0.171648	-3.50081	0.000463838	0.00293902	898
AT4TE06880	330.581	-0.600973	0.148242	-4.054	5.03492e-05	0.000392241	2858
AT5TE25600	269.108	-0.60127	0.160299	-3.75092	0.000176186	0.00122472	2272
AT5TE38525	119.523	-0.601908	0.229197	-2.62616	0.00863533	0.0378705	550
AT5TE53965	165.615	-0.602299	0.20198	-2.98197	0.002864	0.0146115	379
AT5TE52225	166.491	-0.603344	0.200757	-3.00535	0.00265275	0.0136624	1477
AT1TE70230	120.468	-0.603575	0.231716	-2.60481	0.00919266	0.039906	883
AT3TE34430	494.394	-0.603698	0.130874	-4.61282	3.97248e-06	3.70482e-05	1006
AT4TE27360	140.633	-0.603971	0.219168	-2.75574	0.00585596	0.0271408	1316
AT3TE48655	134.679	-0.604	0.222569	-2.71377	0.00665221	0.0302849	330
AT2TE26170	126.495	-0.6046	0.225583	-2.68017	0.0073585	0.0330249	1184
AT2TE33405	117.527	-0.604652	0.230329	-2.62517	0.00866058	0.037957	752
AT1TE37935	175.546	-0.604687	0.198623	-3.0444	0.00233142	0.0122164	1389
AT5TE81390	216.272	-0.604713	0.180085	-3.35793	0.000785276	0.0046868	878
AT2TE06745	159.33	-0.605435	0.212117	-2.85425	0.00431388	0.0208566	1270
AT5TE35230	261.507	-0.605672	0.16204	-3.73779	0.000185643	0.0012833	1095
AT5TE48170	112.435	-0.605771	0.236634	-2.55994	0.0104689	0.0444482	1327
AT1TE00025	441.272	-0.606268	0.131547	-4.60874	4.05108e-06	3.77385e-05	1900
AT3TE66525	379.847	-0.606468	0.143292	-4.23238	2.31231e-05	0.000191082	3125
AT5TE48330	113.885	-0.606697	0.232734	-2.60683	0.00913852	0.0397046	1044
AT5TE54545	188.859	-0.606904	0.186198	-3.25945	0.00111629	0.00637994	3277
AT1TE41845	107.25	-0.607434	0.239703	-2.53411	0.0112734	0.0473439	112
AT1TE58820	251.419	-0.60756	0.173387	-3.50406	0.000458225	0.00290794	2625
AT4TE21290	175.791	-0.607809	0.198836	-3.05684	0.00223686	0.0117803	1007
AT1TE26625	173.526	-0.607901	0.202934	-2.99555	0.00273948	0.0140476	1025
AT5TE62260	132.635	-0.607943	0.230572	-2.63667	0.00837241	0.0369065	1262
AT4TE29035	183.892	-0.608088	0.192863	-3.15295	0.0016163	0.00887131	1151
AT5TE44410	112.541	-0.608157	0.23722	-2.56369	0.0103567	0.0440338	713
AT1TE06470	339.935	-0.608629	0.146738	-4.14774	3.35778e-05	0.000270345	630
AT1TE45615	130.609	-0.608631	0.23601	-2.57884	0.00991326	0.0424824	428
AT5TE63140	190.599	-0.608845	0.18706	-3.25482	0.00113465	0.00647856	2385
AT2TE08780	153.466	-0.608968	0.212891	-2.86047	0.0042302	0.020506	547
AT1TE57820	235.307	-0.609009	0.174972	-3.48061	0.000500281	0.00314521	1631
AT5TE49845	128.176	-0.609139	0.222161	-2.74188	0.0061088	0.0281571	410
AT5TE59075	485.646	-0.609365	0.126823	-4.80484	1.54877e-06	1.54128e-05	3167
AT1TE30890	174.341	-0.609783	0.195147	-3.12473	0.00177966	0.00964179	1284
AT5TE74325	112.706	-0.610654	0.237962	-2.56619	0.0102823	0.0437493	415
AT1TE21370	308.102	-0.610688	0.150812	-4.04933	5.1365e-05	0.000399624	1445
AT3TE47400	399.074	-0.610901	0.137886	-4.43047	9.40284e-06	8.32366e-05	1175
AT3TE80315	212.241	-0.610931	0.178543	-3.42176	0.000622175	0.00380903	1657
AT1TE29770	202.796	-0.611619	0.184168	-3.32099	0.000896976	0.00526556	1436
AT3TE44765	217.645	-0.611652	0.183424	-3.33463	0.000854123	0.00504642	1701
AT5TE39330	123.279	-0.611981	0.237614	-2.57553	0.0100088	0.0428247	1178
AT1TE41525	171.4	-0.61221	0.194897	-3.1412	0.00168256	0.00917618	1691
AT1TE42740	111.953	-0.61224	0.239447	-2.55689	0.0105614	0.0447633	454
AT1TE68785	165.459	-0.612442	0.201314	-3.04222	0.00234837	0.0122858	1325
AT1TE27665	129.102	-0.612476	0.224136	-2.73261	0.00628354	0.0288525	1622
AT1TE21355	167.835	-0.612873	0.199254	-3.07584	0.00209907	0.0111432	1118
AT5TE56435	333.031	-0.613178	0.146736	-4.17879	2.93065e-05	0.000238856	2127
AT2TE23815	217.128	-0.61323	0.181223	-3.38385	0.000714779	0.00431112	2000
AT3TE43880	210.223	-0.613634	0.179111	-3.426	0.000612541	0.00376012	2906
AT4TE25205	452.38	-0.614323	0.131719	-4.6639	3.10273e-06	2.94376e-05	625
AT4TE44650	228.422	-0.614373	0.178285	-3.44603	0.000568896	0.003519	1799
AT5TE28290	124.817	-0.614423	0.228657	-2.68709	0.00720767	0.03244	962
AT1TE10935	278.896	-0.614542	0.15811	-3.88679	0.000101577	0.000743161	690
AT3TE48895	144.198	-0.61459	0.214672	-2.86293	0.00419743	0.0203775	1561
AT5TE03880	175.304	-0.614841	0.194408	-3.16263	0.00156351	0.00861258	1035
AT1TE55015	413.145	-0.614885	0.137744	-4.46397	8.04561e-06	7.2107e-05	1011
AT1TE54420	200.741	-0.615006	0.181927	-3.38051	0.000723508	0.00435673	460
AT4TE25540	182.286	-0.615142	0.194879	-3.15653	0.00159659	0.00877954	420
AT2TE05920	108.41	-0.615758	0.243707	-2.52663	0.0115162	0.0481177	761
AT3TE20050	113.625	-0.615773	0.243242	-2.53152	0.011357	0.0476024	985
AT1TE21790	436.621	-0.61582	0.137999	-4.46248	8.1015e-06	7.24815e-05	1991
AT1TE58325	247.872	-0.615831	0.169224	-3.63914	0.00027355	0.00182204	608
AT1TE72325	140.021	-0.616044	0.229321	-2.68638	0.00722304	0.032495	1477
AT2TE28850	129.414	-0.616331	0.226098	-2.72595	0.00641159	0.0293683	1094
AT5TE52450	120.394	-0.616487	0.229609	-2.68495	0.00725409	0.0325954	197
AT2TE02160	401.418	-0.616546	0.138395	-4.45496	8.39082e-06	7.48907e-05	4039
AT3TE90045	493.348	-0.617586	0.12661	-4.87787	1.0724e-06	1.09016e-05	2217
AT3TE29145	264.761	-0.617684	0.176212	-3.50534	0.000456018	0.00289483	2238
AT1TE74430	127.193	-0.618136	0.22324	-2.76893	0.00562414	0.0262229	1017
AT2TE41170	442.708	-0.618148	0.130649	-4.73136	2.23023e-06	2.16903e-05	914
AT5TE36680	176.496	-0.618466	0.195626	-3.16147	0.00156976	0.0086447	1456
AT2TE06025	137.707	-0.618703	0.217864	-2.83986	0.00451335	0.0216858	3757
AT2TE22550	131.725	-0.619381	0.225267	-2.74955	0.00596777	0.0275968	578
AT2TE49340	126.542	-0.619647	0.225062	-2.75322	0.00590118	0.0273288	623
AT5TE35420	204.358	-0.619739	0.196677	-3.15105	0.00162685	0.00892049	881
AT5TE66790	178.749	-0.619752	0.191222	-3.24101	0.00119105	0.00676579	524
AT2TE50570	118.304	-0.620258	0.23117	-2.68312	0.00729386	0.0327562	730
AT3TE50365	313.201	-0.620395	0.150211	-4.13015	3.62525e-05	0.000290175	1083
AT5TE52830	278.301	-0.621044	0.160871	-3.86052	0.000113146	0.000817905	1010
AT4TE22945	107.943	-0.621267	0.241218	-2.57554	0.0100084	0.0428247	518
AT5TE48220	154.22	-0.622081	0.205108	-3.03294	0.00242185	0.0126204	922
AT3TE66530	110.94	-0.622477	0.235922	-2.63849	0.0083276	0.0367405	842
AT3TE61725	337.38	-0.622983	0.145051	-4.29492	1.74757e-05	0.000147854	1536
AT1TE44890	171.041	-0.622985	0.207165	-3.00719	0.00263673	0.0135988	711
AT4TE51575	179.73	-0.623152	0.193535	-3.21985	0.00128258	0.0072189	1360
AT5TE50155	142.426	-0.623256	0.212829	-2.92843	0.00340679	0.0169679	2087
AT3TE63300	124.56	-0.62339	0.233047	-2.67496	0.00747383	0.0334884	1477
AT3TE23620	168.497	-0.623478	0.196261	-3.17678	0.00148918	0.00824471	858
AT1TE42670	169.459	-0.623523	0.200954	-3.10282	0.00191685	0.0102996	844
AT5TE49150	207.473	-0.623922	0.179267	-3.4804	0.000500663	0.00314665	1176
AT4TE10775	165.163	-0.624589	0.207745	-3.00652	0.00264256	0.0136225	451
AT3TE69195	332.481	-0.624801	0.14629	-4.27097	1.94626e-05	0.000163054	2096
AT1TE37260	108.984	-0.625414	0.243584	-2.56755	0.0102419	0.0436362	865
AT1TE53815	769.675	-0.625711	0.105562	-5.92745	3.07666e-09	4.22591e-08	5445
AT3TE49985	110.407	-0.62588	0.239019	-2.61854	0.00883067	0.0385626	1552
AT1TE55925	156.012	-0.625909	0.20428	-3.06397	0.00218418	0.0115339	1838
AT5TE42000	259.443	-0.626084	0.169501	-3.69368	0.000221035	0.00150418	1298
AT1TE77560	147.097	-0.626125	0.214426	-2.92	0.00350029	0.0173642	1046
AT1TE41865	190.512	-0.626355	0.186725	-3.35442	0.000795305	0.00473566	948
AT5TE71680	102.878	-0.626944	0.245246	-2.55639	0.0105765	0.0448155	1107
AT2TE22585	156.145	-0.627132	0.203957	-3.07483	0.00210625	0.0111761	1391
AT3TE47685	127.888	-0.627257	0.232688	-2.6957	0.00702412	0.0317251	1624
AT2TE06235	124.716	-0.62743	0.225961	-2.77671	0.00549121	0.0256936	1743
AT5TE87980	99.2801	-0.627853	0.249959	-2.51183	0.0120108	0.0498551	601
AT4TE21985	142.007	-0.628069	0.214175	-2.9325	0.00336246	0.0167939	1811
AT2TE07645	150.879	-0.628174	0.206234	-3.04594	0.00231958	0.0121645	670
AT3TE63215	1099.33	-0.62838	0.0929672	-6.75916	1.38793e-11	2.34131e-10	4252
AT2TE11115	219.857	-0.628415	0.179197	-3.50684	0.000453463	0.00288039	958
AT1TE42975	199.756	-0.629376	0.189427	-3.32253	0.000892037	0.00524129	1228
AT1TE35670	106.025	-0.629887	0.241319	-2.61018	0.00904943	0.0394045	738
AT2TE77780	431.247	-0.630156	0.144645	-4.35657	1.32118e-05	0.000114057	2174
AT3TE46630	222.336	-0.630459	0.174247	-3.61818	0.000296677	0.001958	1118
AT2TE28320	146.66	-0.63051	0.211833	-2.97645	0.00291607	0.0148357	346
AT1TE86175	120.53	-0.630553	0.236032	-2.67147	0.0075519	0.0337749	670
AT3TE74275	493.785	-0.630833	0.124365	-5.07245	3.92717e-07	4.27106e-06	2163
AT4TE44220	226.877	-0.630915	0.173712	-3.63195	0.000281287	0.00186752	2044
AT1TE18295	334.172	-0.631624	0.150344	-4.2012	2.65507e-05	0.000217343	1437
AT2TE23685	358.209	-0.631773	0.142743	-4.42596	9.60153e-06	8.49223e-05	1516
AT5TE36625	130.128	-0.631829	0.21983	-2.87417	0.00405089	0.0197641	585
AT4TE41060	258.418	-0.632257	0.163634	-3.86385	0.000111614	0.000807685	1206
AT3TE62800	204.756	-0.633142	0.190903	-3.31657	0.000911288	0.0053389	3054
AT1TE66090	528.125	-0.633213	0.121434	-5.21445	1.84365e-07	2.08795e-06	2046
AT5TE68285	103.29	-0.633371	0.246384	-2.57066	0.0101504	0.0433497	209
AT3TE58530	259.022	-0.634554	0.173245	-3.66277	0.000249505	0.0016771	690
AT4TE21630	190.425	-0.634894	0.187157	-3.39232	0.000693046	0.00419049	2163
AT2TE24820	482.713	-0.635051	0.129526	-4.90288	9.44401e-07	9.71094e-06	3889
AT2TE30510	222.145	-0.635731	0.175834	-3.61552	0.00029974	0.00197663	981
AT3TE46335	188.446	-0.635999	0.196627	-3.23455	0.00121836	0.00689807	709
AT1TE53560	146.172	-0.636072	0.212012	-3.00017	0.00269833	0.0138678	1454
AT3TE69035	177.082	-0.636311	0.196705	-3.23485	0.00121705	0.0068916	1433
AT1TE42010	109.426	-0.636419	0.241987	-2.62997	0.00853917	0.0374928	1721
AT3TE69085	97.3159	-0.636526	0.250036	-2.54574	0.0109048	0.0460592	1550
AT3TE40295	249.303	-0.637228	0.166051	-3.83755	0.000124268	0.000890505	1333
AT3TE24555	296.001	-0.63794	0.155	-4.11574	3.85939e-05	0.000307301	590
AT1TE44255	597.792	-0.63817	0.116923	-5.45802	4.81472e-08	5.85774e-07	3566
AT2TE27450	119.233	-0.638689	0.228694	-2.79277	0.00522593	0.0245979	392
AT3TE43930	166.917	-0.639146	0.207979	-3.07313	0.00211823	0.011226	885
AT4TE23955	130.148	-0.639242	0.239641	-2.66751	0.00764167	0.0340958	2114
AT5TE39365	168.385	-0.639298	0.203607	-3.13986	0.00169028	0.00921462	1525
AT3TE47265	124.584	-0.639716	0.224455	-2.85009	0.00437073	0.0210967	269
AT3TE63825	132.84	-0.639729	0.218853	-2.92309	0.00346572	0.0172134	426
AT3TE48840	247.376	-0.639738	0.17088	-3.74378	0.000181273	0.00125499	1266
AT3TE38660	238.187	-0.639991	0.169116	-3.78433	0.000154121	0.00108362	1514
AT1TE87980	131.516	-0.640216	0.22358	-2.86347	0.00419027	0.0203451	671
AT1TE58615	138.096	-0.640325	0.215525	-2.97101	0.00296827	0.0150612	1036
AT5TE49245	455.244	-0.640405	0.129449	-4.94717	7.53e-07	7.83692e-06	1604
AT1TE08240	113.399	-0.640432	0.2363	-2.71025	0.00672333	0.0305511	309
AT5TE43145	218.694	-0.640684	0.176673	-3.62638	0.000287419	0.00190393	1784
AT1TE92165	308.367	-0.640862	0.151022	-4.2435	2.20056e-05	0.000182463	2340
AT2TE05440	334.251	-0.641635	0.150428	-4.2654	1.99544e-05	0.000166937	1052
AT4TE09255	332.629	-0.641772	0.146377	-4.38439	1.1631e-05	0.000101432	3666
AT3TE28255	161.609	-0.642358	0.199704	-3.21655	0.0012974	0.00729531	1339
AT5TE73035	599.199	-0.643433	0.117943	-5.45546	4.8846e-08	5.93223e-07	3355
AT1TE44730	106.745	-0.643856	0.243772	-2.64122	0.00826088	0.0364735	1051
AT5TE65275	278.807	-0.644074	0.163857	-3.93072	8.46932e-05	0.000632468	4684
AT1TE53105	185.093	-0.644163	0.19255	-3.34543	0.000821555	0.00487502	441
AT1TE54515	104.695	-0.645218	0.252375	-2.55659	0.0105704	0.0447942	487
AT3TE47895	153.513	-0.64541	0.205208	-3.14514	0.00166005	0.00907268	714
AT2TE08645	270.644	-0.645558	0.163099	-3.95808	7.55562e-05	0.00056972	1321
AT5TE36875	149.842	-0.645711	0.207882	-3.10615	0.00189543	0.0102044	1337
AT5TE49300	168.793	-0.646012	0.198638	-3.2522	0.00114515	0.00653125	1471
AT5TE48565	98.5084	-0.646149	0.253195	-2.55198	0.0107112	0.0453302	966
AT1TE44435	266.128	-0.646388	0.16119	-4.0101	6.06939e-05	0.000466466	1212
AT2TE10275	170.189	-0.646473	0.196831	-3.28441	0.00102196	0.00590782	498
AT1TE34170	190.049	-0.646499	0.192108	-3.36529	0.000764641	0.00457827	1348
AT3TE66705	208.818	-0.646605	0.181572	-3.56115	0.000369241	0.00239235	2098
AT3TE46525	189.948	-0.646676	0.191941	-3.36914	0.000754027	0.00452593	567
AT1TE85730	437.814	-0.646755	0.137075	-4.71826	2.3787e-06	2.30578e-05	2329
AT5TE25540	140.865	-0.646829	0.216096	-2.99325	0.00276021	0.0141363	596
AT2TE77265	103.116	-0.647376	0.244138	-2.65168	0.00800928	0.035519	523
AT3TE48695	123.574	-0.647422	0.227742	-2.84279	0.00447204	0.0215351	329
AT5TE14290	446.778	-0.647458	0.130535	-4.96004	7.04784e-07	7.37807e-06	2205
AT2TE25320	113.695	-0.647526	0.233952	-2.76777	0.00564413	0.0262953	472
AT2TE22660	183.959	-0.647879	0.190586	-3.3994	0.000675334	0.00409182	1562
AT1TE55895	98.7496	-0.647909	0.256075	-2.53016	0.0114011	0.0477484	587
AT2TE22305	136.389	-0.647946	0.216458	-2.9934	0.00275884	0.014131	1080
AT3TE45970	325.982	-0.648026	0.148343	-4.36843	1.25145e-05	0.000108607	805
AT3TE39890	450.037	-0.648673	0.131623	-4.92824	8.29717e-07	8.5897e-06	1684
AT1TE42050	158.258	-0.648772	0.206166	-3.14685	0.00165039	0.0090307	1253
AT1TE60195	111.411	-0.648815	0.23738	-2.73323	0.0062716	0.0288073	168
AT1TE11380	159.075	-0.648918	0.201173	-3.22567	0.00125679	0.00709415	1193
AT2TE04145	524.715	-0.649763	0.12987	-5.00318	5.63924e-07	5.98115e-06	1443
AT2TE06255	160.826	-0.650086	0.20514	-3.16898	0.00152973	0.00845029	1038
AT3TE70595	163.878	-0.65039	0.203837	-3.19074	0.0014191	0.00790504	441
AT4TE54920	121.537	-0.650441	0.232561	-2.79686	0.00516015	0.0243384	2355
AT5TE46950	393.563	-0.650683	0.13662	-4.76272	1.90998e-06	1.87442e-05	4445
AT5TE52530	110.069	-0.651099	0.238612	-2.7287	0.00635851	0.0291707	222
AT2TE35115	336.473	-0.651764	0.14948	-4.36022	1.29933e-05	0.000112359	2493
AT3TE83285	174.595	-0.651809	0.1986	-3.28203	0.00103064	0.00594993	620
AT2TE25260	193.406	-0.652053	0.18744	-3.47872	0.000503815	0.00316308	2322
AT4TE24595	297.982	-0.653064	0.154468	-4.22781	2.35973e-05	0.000194679	1714
AT1TE36890	435.841	-0.653155	0.134682	-4.84962	1.23696e-06	1.24789e-05	3858
AT1TE42915	398.53	-0.653179	0.136017	-4.80217	1.56952e-06	1.55928e-05	728
AT4TE25480	127.718	-0.65342	0.232742	-2.80748	0.00499302	0.0236642	1293
AT1TE82280	111.706	-0.653479	0.235673	-2.77282	0.00555727	0.0259525	364
AT5TE62740	667.385	-0.653596	0.110557	-5.91184	3.38308e-09	4.62977e-08	7571
AT5TE70795	188.304	-0.653974	0.190892	-3.42589	0.000612785	0.00376106	637
AT2TE10590	112.689	-0.654014	0.245037	-2.66905	0.00760672	0.033972	650
AT1TE42755	188.988	-0.654086	0.186745	-3.50256	0.000460809	0.00292245	1606
AT1TE40565	102.097	-0.65409	0.254839	-2.56668	0.0102678	0.0436921	248
AT4TE35580	423.085	-0.654363	0.133962	-4.88468	1.03595e-06	1.05651e-05	2572
AT2TE29225	390.56	-0.654434	0.137703	-4.75251	2.00908e-06	1.96697e-05	2295
AT5TE57080	114.165	-0.654562	0.241389	-2.71165	0.00669495	0.0304499	923
AT2TE27820	225.401	-0.655016	0.187144	-3.50006	0.000465158	0.00294693	4729
AT5TE59815	199.726	-0.655225	0.1835	-3.5707	0.000356025	0.00231366	2039
AT1TE37710	92.0685	-0.655445	0.256966	-2.55071	0.0107504	0.045468	984
AT1TE54100	174.087	-0.655994	0.201979	-3.24784	0.00116285	0.00662208	739
AT2TE09345	142.261	-0.656019	0.21616	-3.03488	0.00240631	0.0125505	1078
AT4TE21925	125.707	-0.656121	0.233501	-2.80993	0.00495519	0.023512	1973
AT2TE29725	814.039	-0.656254	0.105951	-6.19395	5.86752e-10	8.66429e-09	2511
AT4TE81120	367.036	-0.656482	0.154081	-4.26064	2.03846e-05	0.000170258	2045
AT5TE26575	98.232	-0.656569	0.251292	-2.61277	0.00898118	0.0391481	1452
AT1TE69270	424.243	-0.656611	0.132513	-4.95509	7.22982e-07	7.54935e-06	2249
AT5TE87010	497.9	-0.656793	0.127341	-5.15776	2.49918e-07	2.77754e-06	2089
AT5TE71030	375.874	-0.656862	0.141976	-4.62656	3.71797e-06	3.48168e-05	2780
AT3TE50430	133.102	-0.657108	0.217662	-3.01893	0.0025367	0.0131474	459
AT3TE48705	105.172	-0.657429	0.245964	-2.67286	0.00752068	0.0336536	238
AT1TE36055	92.2088	-0.658098	0.259043	-2.5405	0.0110694	0.0466348	406
AT2TE47365	111.905	-0.658678	0.235812	-2.79323	0.00521847	0.0245684	996
AT1TE45640	100.576	-0.658989	0.253171	-2.60294	0.00924272	0.0400852	622
AT4TE79615	91.5212	-0.659279	0.259521	-2.54037	0.0110735	0.0466427	1544
AT3TE65370	241.994	-0.660174	0.170095	-3.8812	0.000103942	0.000757772	778
AT5TE74510	484.171	-0.660252	0.126616	-5.2146	1.84219e-07	2.08687e-06	2351
AT3TE11075	138.681	-0.660653	0.215045	-3.07217	0.00212512	0.0112597	190
AT2TE23650	141.975	-0.660946	0.223219	-2.96098	0.00306666	0.0154897	562
AT5TE42005	187.306	-0.661293	0.18846	-3.50892	0.000449931	0.00285928	902
AT5TE63200	100.949	-0.661349	0.263352	-2.51128	0.0120295	0.0499276	1344
AT5TE66550	458.007	-0.661455	0.132197	-5.00357	5.62772e-07	5.97201e-06	1046
AT1TE22750	460.059	-0.661523	0.12799	-5.16854	2.35936e-07	2.63497e-06	2345
AT4TE32975	163.729	-0.661791	0.198873	-3.3277	0.000875663	0.00515849	1763
AT1TE12430	792.584	-0.662152	0.107802	-6.14231	8.1329e-10	1.18899e-08	1916
AT1TE45545	140.217	-0.662258	0.212941	-3.11006	0.00187049	0.0100853	946
AT5TE35500	139.575	-0.662388	0.22188	-2.98535	0.00283254	0.0144635	1349
AT3TE49835	238.316	-0.66241	0.171078	-3.87198	0.000107954	0.000783818	2527
AT1TE71035	100.736	-0.662825	0.246247	-2.69171	0.00710865	0.0320611	997
AT1TE54560	109.142	-0.662966	0.238061	-2.78486	0.00535514	0.0251341	1079
AT2TE10585	210.486	-0.663147	0.186233	-3.56085	0.000369663	0.00239471	1203
AT2TE26620	90.898	-0.663414	0.258091	-2.57047	0.0101561	0.0433682	1220
AT1TE45610	104.573	-0.664174	0.248474	-2.67301	0.00751735	0.033646	860
AT2TE22690	377.772	-0.664384	0.142742	-4.65446	3.24838e-06	3.07344e-05	2103
AT2TE58530	584.737	-0.664448	0.119194	-5.57452	2.4821e-08	3.11569e-07	3800
AT4TE55460	191.686	-0.66501	0.197916	-3.36005	0.00077927	0.00465366	1516
AT2TE29120	351.115	-0.665304	0.144992	-4.58856	4.46304e-06	4.13606e-05	1097
AT4TE05570	218.08	-0.665533	0.176614	-3.76829	0.000164371	0.00114763	2139
AT2TE25695	183.269	-0.665611	0.195117	-3.41134	0.00064645	0.00393946	2192
AT5TE38545	104.998	-0.665802	0.25716	-2.58906	0.0096239	0.0414498	475
AT2TE30530	112.309	-0.665974	0.236548	-2.81539	0.00487182	0.0231806	757
AT3TE42790	94.7591	-0.666001	0.25745	-2.58692	0.00968393	0.0416691	240
AT1TE38300	222.331	-0.666007	0.18934	-3.51751	0.000435608	0.0027777	1081
AT1TE26710	122.203	-0.666081	0.226337	-2.94287	0.00325181	0.0163024	1083
AT4TE06655	104.206	-0.666309	0.255601	-2.60683	0.00913852	0.0397046	960
AT2TE27270	334.792	-0.66647	0.148711	-4.48165	7.40688e-06	6.67756e-05	2420
AT2TE44900	183.854	-0.666544	0.189126	-3.52434	0.000424533	0.00271213	1370
AT1TE56975	278.472	-0.666567	0.163232	-4.08356	4.43506e-05	0.000348814	915
AT3TE83275	147.49	-0.666664	0.211513	-3.15189	0.00162219	0.00889907	249
AT1TE40090	397.941	-0.666868	0.136366	-4.89027	1.007e-06	1.02903e-05	2577
AT3TE47190	222.024	-0.66732	0.176455	-3.78182	0.000155685	0.00109293	1815
AT3TE46795	229.612	-0.667681	0.177007	-3.77206	0.000161902	0.00113271	1099
AT4TE23520	612.361	-0.668264	0.115789	-5.77138	7.86264e-09	1.039e-07	2431
AT1TE56745	129.306	-0.668387	0.226696	-2.94839	0.00319439	0.0160559	536
AT4TE52280	459.326	-0.668416	0.134384	-4.97393	6.56086e-07	6.9052e-06	4317
AT1TE26735	205.623	-0.668747	0.186028	-3.59487	0.000324553	0.00212594	1440
AT1TE62830	289.986	-0.668946	0.155463	-4.30291	1.68566e-05	0.00014297	699
AT1TE08420	447.744	-0.669018	0.129215	-5.17757	2.24789e-07	2.51732e-06	1284
AT1TE57675	103.425	-0.669239	0.247882	-2.69983	0.00693743	0.0313997	625
AT5TE61435	118.557	-0.669401	0.232569	-2.87829	0.00399834	0.0195541	1596
AT4TE21730	85.7863	-0.669418	0.26578	-2.5187	0.011779	0.0490713	645
AT2TE54845	560.39	-0.669726	0.124883	-5.36282	8.19323e-08	9.68849e-07	1680
AT3TE65180	162.029	-0.669893	0.208271	-3.21644	0.0012979	0.00729711	1620
AT4TE84220	148.547	-0.670124	0.213858	-3.13349	0.00172739	0.00938703	556
AT5TE60915	111.08	-0.67023	0.241832	-2.77147	0.00558037	0.0260396	687
AT3TE45990	113.461	-0.670378	0.240691	-2.78522	0.00534914	0.0251146	333
AT4TE03080	113.503	-0.6706	0.243577	-2.75313	0.00590287	0.0273305	1737
AT1TE51635	164.367	-0.670983	0.20135	-3.33242	0.000860937	0.00508084	818
AT2TE09420	110.997	-0.67135	0.238398	-2.81609	0.00486117	0.0231362	570
AT1TE58620	113.557	-0.671492	0.243628	-2.75622	0.0058474	0.0271041	443
AT2TE44910	177.537	-0.67159	0.194946	-3.44501	0.000571047	0.00352912	609
AT3TE68385	191.232	-0.671661	0.18658	-3.59986	0.000318385	0.00208953	1330
AT2TE28765	115.702	-0.672307	0.234547	-2.8664	0.00415169	0.0201888	1188
AT2TE06765	139.508	-0.672832	0.21864	-3.07735	0.00208847	0.0110998	597
AT5TE31125	88.2003	-0.672938	0.264718	-2.54209	0.011019	0.0464631	976
AT1TE55095	109.592	-0.673826	0.239838	-2.80951	0.00496175	0.023535	343
AT5TE49840	236.516	-0.673831	0.173489	-3.884	0.000102754	0.00075057	1047
AT2TE51170	155.427	-0.673995	0.205026	-3.28737	0.00101128	0.00584971	1479
AT2TE23720	170.827	-0.674175	0.196857	-3.4247	0.000615486	0.00377539	827
AT5TE01260	472.245	-0.674187	0.137252	-4.91205	9.01305e-07	9.28871e-06	632
AT1TE02465	340.352	-0.674297	0.144918	-4.65295	3.27216e-06	3.0938e-05	1970
AT4TE06910	104.337	-0.67462	0.244939	-2.75424	0.00588295	0.0272505	1448
AT5TE48410	218.91	-0.674669	0.175048	-3.8542	0.000116108	0.000837842	2952
AT1TE35280	272.821	-0.674802	0.170153	-3.96585	7.31354e-05	0.000552277	1410
AT3TE74700	258.044	-0.674887	0.166182	-4.06114	4.88338e-05	0.00038152	2443
AT1TE61175	108.982	-0.675209	0.239764	-2.81614	0.00486051	0.0231362	220
AT1TE74085	443.04	-0.675524	0.130874	-5.16162	2.44816e-07	2.72768e-06	2546
AT1TE54410	174.671	-0.675596	0.196069	-3.4457	0.00056958	0.00352165	1302
AT1TE54770	396.769	-0.676085	0.143194	-4.72147	2.34143e-06	2.27073e-05	3925
AT4TE16640	146.72	-0.67631	0.219971	-3.07454	0.00210828	0.0111834	1252
AT1TE55515	123.732	-0.67666	0.235551	-2.87266	0.00407029	0.019847	202
AT3TE32605	191.189	-0.676892	0.196984	-3.43627	0.000589777	0.00363178	696
AT1TE52570	109.799	-0.676902	0.2417	-2.80059	0.00510092	0.0241088	2295
AT1TE37890	353.279	-0.677591	0.147469	-4.5948	4.33155e-06	4.02145e-05	2668
AT2TE27750	148.378	-0.678407	0.218987	-3.09793	0.00194878	0.0104478	1361
AT1TE29665	190.302	-0.678587	0.189689	-3.57736	0.000347078	0.00226052	897
AT4TE25810	137.461	-0.678849	0.215146	-3.15529	0.00160337	0.00880834	547
AT5TE71670	149.705	-0.678913	0.207214	-3.27638	0.00105146	0.00604979	1133
AT3TE46085	106.045	-0.679035	0.241055	-2.81693	0.00484854	0.0230859	746
AT5TE64270	103.841	-0.679255	0.245661	-2.765	0.0056922	0.0264768	2034
AT1TE54510	88.5008	-0.68001	0.268306	-2.53446	0.0112621	0.0473061	208
AT1TE65925	575.911	-0.68053	0.120745	-5.6361	1.73942e-08	2.22142e-07	4049
AT1TE26720	183.017	-0.681414	0.195842	-3.4794	0.000502535	0.00315694	613
AT4TE47470	302.529	-0.681615	0.155482	-4.38388	1.16582e-05	0.000101617	2316
AT5TE38800	119.355	-0.681726	0.23312	-2.92435	0.00345173	0.0171564	833
AT2TE32320	108.519	-0.681809	0.245769	-2.77419	0.00553393	0.0258581	752
AT1TE38945	113.084	-0.681975	0.234033	-2.91401	0.00356815	0.0176526	890
AT3TE32175	98.6551	-0.682103	0.25321	-2.69382	0.00706376	0.0318726	1148
AT3TE47295	344.66	-0.682218	0.145185	-4.69897	2.61476e-06	2.51092e-05	2740
AT3TE62190	102.435	-0.682312	0.246005	-2.77357	0.00554454	0.0259018	862
AT3TE09015	152.354	-0.682448	0.210456	-3.24271	0.001184	0.00673092	907
AT2TE09760	139.274	-0.682549	0.215422	-3.16843	0.00153267	0.00846313	993
AT5TE35415	197.538	-0.683257	0.183827	-3.71686	0.000201716	0.00138671	1369
AT3TE49210	212.124	-0.683445	0.17805	-3.8385	0.000123787	0.000887707	2636
AT1TE40925	302.02	-0.683644	0.156973	-4.35518	1.32959e-05	0.00011471	2183
AT3TE32600	127.97	-0.684124	0.229647	-2.97902	0.00289169	0.014729	512
AT1TE53750	288.832	-0.684297	0.157576	-4.34266	1.40767e-05	0.000120737	2183
AT3TE83270	196.924	-0.684501	0.185249	-3.69503	0.00021986	0.00149718	624
AT1TE54715	190.887	-0.684669	0.189682	-3.60955	0.000306724	0.00201816	441
AT1TE75780	464.064	-0.685134	0.132631	-5.16571	2.39529e-07	2.67437e-06	2219
AT4TE19535	132.496	-0.68521	0.219607	-3.12016	0.00180752	0.00977984	537
AT1TE53250	167.004	-0.685289	0.19727	-3.47387	0.000513015	0.00321348	3146
AT5TE48360	128.867	-0.68569	0.232234	-2.95258	0.00315135	0.0158648	2070
AT1TE81275	193.31	-0.68605	0.188971	-3.63045	0.000282933	0.00187694	1496
AT1TE68775	164.071	-0.686098	0.203811	-3.36634	0.000761729	0.00456416	1512
AT2TE05420	106.454	-0.686278	0.243107	-2.82294	0.00475849	0.0226992	1133
AT4TE26330	263.084	-0.686412	0.164315	-4.17742	2.94831e-05	0.00024001	1624
AT5TE01250	174.173	-0.687217	0.197935	-3.47194	0.000516717	0.00323322	191
AT2TE26870	131.842	-0.687255	0.220297	-3.11967	0.00181051	0.00979343	486
AT2TE13800	337.124	-0.687425	0.150231	-4.5758	4.74398e-06	4.37963e-05	3371
AT1TE41725	128.723	-0.687588	0.222857	-3.08534	0.00203322	0.0108468	1193
AT5TE73480	198.892	-0.688626	0.186422	-3.6939	0.000220838	0.00150309	634
AT5TE38600	125.706	-0.689084	0.22562	-3.05418	0.00225677	0.0118745	1631
AT4TE24580	95.7727	-0.689594	0.252739	-2.72849	0.00636253	0.0291859	891
AT4TE06555	443.549	-0.689714	0.132697	-5.19767	2.01802e-07	2.27539e-06	2644
AT4TE25425	200.543	-0.689804	0.186716	-3.69441	0.000220394	0.00150056	1661
AT3TE46115	195.181	-0.689816	0.188588	-3.65779	0.0002544	0.00170554	1184
AT3TE47615	152.775	-0.68997	0.206776	-3.3368	0.000847485	0.00501368	769
AT4TE50445	206.642	-0.690201	0.181705	-3.79848	0.000145585	0.00102941	1068
AT3TE64925	138.978	-0.690301	0.215751	-3.19953	0.00137651	0.00769489	1117
AT5TE19645	355.225	-0.69053	0.144863	-4.76678	1.87194e-06	1.8384e-05	2308
AT1TE13370	88.3095	-0.690753	0.267339	-2.58381	0.00977149	0.0419756	77
AT3TE68875	204.347	-0.690808	0.180762	-3.82165	0.000132562	0.000945297	3162
AT4TE23570	131.222	-0.69099	0.220158	-3.1386	0.00169755	0.00925054	683
AT1TE55575	152.013	-0.691329	0.207488	-3.33191	0.000862535	0.00508735	2736
AT2TE09540	139.927	-0.691437	0.220205	-3.13997	0.00168964	0.00921237	759
AT2TE05095	212.831	-0.691669	0.177352	-3.89999	9.61972e-05	0.000707745	1949
AT1TE46950	267.016	-0.691829	0.166684	-4.15053	3.31703e-05	0.000267536	1485
AT5TE54310	129.008	-0.691909	0.222193	-3.114	0.00184572	0.00996815	1276
AT3TE33205	226.846	-0.69225	0.173586	-3.98793	6.66527e-05	0.000507331	1572
AT2TE06350	100.892	-0.692305	0.264345	-2.61894	0.00882024	0.0385305	911
AT3TE49925	97.5038	-0.692367	0.251831	-2.74933	0.00597175	0.027612	636
AT2TE32315	394.833	-0.69251	0.149557	-4.6304	3.64959e-06	3.4231e-05	2701
AT1TE76130	168.362	-0.692732	0.201713	-3.43425	0.000594203	0.00365738	1712
AT2TE09950	89.1313	-0.692945	0.267875	-2.58683	0.00968643	0.0416755	642
AT1TE34365	161.43	-0.693274	0.201066	-3.44799	0.000564783	0.00349514	1344
AT3TE64920	281.783	-0.693379	0.162216	-4.27441	1.91647e-05	0.000160788	2511
AT2TE04900	223.03	-0.693568	0.174588	-3.9726	7.10917e-05	0.000538229	2991
AT2TE06750	485.181	-0.69431	0.126397	-5.4931	3.94933e-08	4.85228e-07	2920
AT3TE70035	344.253	-0.694579	0.146109	-4.75385	1.99578e-06	1.95535e-05	2508
AT3TE49900	102.258	-0.694667	0.246884	-2.81374	0.00489686	0.0232836	459
AT3TE47705	132.999	-0.695302	0.222602	-3.12352	0.00178702	0.00967783	1173
AT2TE73135	81.4127	-0.69543	0.273678	-2.54106	0.0110518	0.0465729	1119
AT5TE54805	100.643	-0.695508	0.247456	-2.81063	0.00494441	0.0234663	2989
AT1TE60645	128.615	-0.695566	0.228959	-3.03795	0.00238194	0.0124377	990
AT2TE26190	141.579	-0.695571	0.215712	-3.22454	0.00126176	0.00711728	1806
AT4TE30450	238.911	-0.696568	0.174774	-3.98554	6.73275e-05	0.000511803	1795
AT5TE75120	165.595	-0.69705	0.201163	-3.46511	0.000530022	0.00330791	1151
AT1TE26120	407.729	-0.697163	0.134422	-5.18639	2.14408e-07	2.40697e-06	2209
AT4TE32070	117.708	-0.697172	0.230131	-3.02946	0.00244995	0.0127458	868
AT4TE33025	182.889	-0.697561	0.200598	-3.47741	0.000506274	0.00317609	1159
AT1TE92905	154.813	-0.697929	0.204698	-3.40956	0.000650683	0.00395997	851
AT1TE72980	516.878	-0.698168	0.124682	-5.59959	2.14857e-08	2.71777e-07	1273
AT2TE24415	478.454	-0.698755	0.129281	-5.40495	6.48274e-08	7.74725e-07	1896
AT5TE51630	97.7818	-0.699862	0.249757	-2.80217	0.00507609	0.0240108	926
AT3TE63245	162.701	-0.700038	0.199951	-3.50105	0.000463428	0.00293778	749
AT5TE74350	167.6	-0.700212	0.206939	-3.38366	0.000715265	0.00431215	1157
AT2TE25970	219.275	-0.700238	0.179931	-3.89171	9.95422e-05	0.000730094	3575
AT2TE24835	121.159	-0.701059	0.233666	-3.00025	0.00269754	0.0138672	608
AT3TE34420	93.3339	-0.70117	0.260003	-2.69678	0.00700136	0.0316326	271
AT5TE58590	220.987	-0.701832	0.180733	-3.88325	0.000103067	0.00075246	1037
AT5TE01220	195.271	-0.701866	0.188321	-3.72696	0.000193806	0.00133613	1978
AT3TE65005	292.794	-0.702238	0.156598	-4.48433	7.31422e-06	6.60126e-05	2918
AT2TE17335	100.369	-0.70236	0.257994	-2.72239	0.00648123	0.0296285	1663
AT5TE64195	560.799	-0.702383	0.1303	-5.3905	7.02625e-08	8.36275e-07	2578
AT2TE27490	831.18	-0.70252	0.107292	-6.54775	5.84117e-11	9.40214e-10	2061
AT1TE55590	112.612	-0.702703	0.235317	-2.98619	0.00282475	0.0144273	1769
AT1TE40560	359.515	-0.702971	0.145228	-4.84045	1.29543e-06	1.30176e-05	879
AT5TE36890	152.773	-0.703017	0.207256	-3.39202	0.000693784	0.00419433	1323
AT1TE87970	234.189	-0.70319	0.174137	-4.03813	5.38779e-05	0.000417909	696
AT5TE48065	80.8919	-0.703231	0.272582	-2.57989	0.00988315	0.0423976	586
AT5TE47540	91.746	-0.703765	0.261343	-2.69288	0.0070837	0.0319591	714
AT5TE70155	224.199	-0.704103	0.1779	-3.95787	7.56207e-05	0.000570102	1432
AT1TE31660	104.218	-0.704422	0.245437	-2.87008	0.00410372	0.0199861	1513
AT4TE25000	217.078	-0.704502	0.179382	-3.92739	8.58734e-05	0.000639655	1125
AT1TE55055	117.417	-0.704689	0.232446	-3.03163	0.00243238	0.0126657	769
AT3TE63260	88.6872	-0.704789	0.261025	-2.70008	0.00693229	0.0313896	1154
AT5TE37855	92.5882	-0.704866	0.256837	-2.74441	0.00606205	0.0279698	478
AT5TE69870	254.743	-0.704945	0.183802	-3.83535	0.000125388	0.000898028	2343
AT2TE17275	162.19	-0.704984	0.201521	-3.49832	0.000468205	0.00296304	2525
AT5TE17300	410.02	-0.705175	0.134712	-5.23468	1.6527e-07	1.88102e-06	2373
AT1TE51525	193.964	-0.705177	0.188167	-3.74761	0.000178528	0.00123932	1219
AT4TE21205	80.2157	-0.705487	0.275915	-2.5569	0.0105611	0.0447633	285
AT5TE47920	194.113	-0.705571	0.189192	-3.7294	0.000191939	0.0013246	2934
AT5TE06875	407.79	-0.705594	0.135805	-5.19564	2.04021e-07	2.29916e-06	2377
AT2TE10270	130.539	-0.705871	0.222086	-3.17836	0.0014811	0.00820702	667
AT2TE09280	250.848	-0.706088	0.170863	-4.13248	3.58866e-05	0.000287414	1542
AT4TE23790	101.217	-0.706119	0.248769	-2.83845	0.00453334	0.0217717	717
AT4TE01620	85.7543	-0.706134	0.267291	-2.64182	0.00824612	0.0364234	670
AT5TE47460	265.315	-0.706155	0.166846	-4.23237	2.31241e-05	0.000191082	1870
AT5TE53515	340.81	-0.706279	0.15224	-4.63924	3.49698e-06	3.29274e-05	2216
AT4TE17760	649.627	-0.706428	0.11471	-6.15836	7.35003e-10	1.07799e-08	3666
AT5TE49250	180.89	-0.706608	0.192285	-3.67479	0.000238042	0.00160662	656
AT3TE46655	191.767	-0.706772	0.18697	-3.78015	0.000156737	0.00109938	2288
AT2TE23620	133.749	-0.706813	0.21801	-3.24211	0.0011865	0.00674274	1196
AT4TE30830	241.784	-0.707193	0.17744	-3.98554	6.73272e-05	0.000511803	1392
AT3TE66225	123.661	-0.707516	0.226097	-3.12926	0.00175245	0.00950813	553
AT2TE10025	87.41	-0.707784	0.271085	-2.61093	0.00902961	0.0393353	786
AT1TE42745	114.579	-0.708044	0.238486	-2.96891	0.00298859	0.0151573	563
AT3TE49395	182.611	-0.708641	0.190642	-3.71712	0.000201503	0.00138618	1206
AT3TE84475	115.308	-0.708664	0.236991	-2.99025	0.00278745	0.0142652	863
AT2TE44355	195.16	-0.708913	0.186048	-3.81037	0.000138758	0.000986909	887
AT4TE85270	291.124	-0.708933	0.177582	-3.99215	6.54761e-05	0.000499406	1244
AT5TE36610	196.747	-0.70965	0.187555	-3.78369	0.000154517	0.00108622	470
AT3TE43365	87.372	-0.709898	0.264631	-2.6826	0.00730529	0.0328004	213
AT4TE23180	417.044	-0.710053	0.134054	-5.29675	1.17883e-07	1.36666e-06	2984
AT1TE63440	112.645	-0.710661	0.25559	-2.78047	0.00542806	0.0254357	629
AT1TE37975	180.586	-0.710811	0.195984	-3.62689	0.000286857	0.00190051	2154
AT1TE44155	171.166	-0.710995	0.196018	-3.6272	0.000286508	0.00189882	715
AT1TE76395	126.279	-0.711	0.227662	-3.12305	0.00178988	0.00969207	633
AT5TE36165	438.294	-0.711419	0.132853	-5.35494	8.55827e-08	1.00898e-06	1551
AT4TE22725	92.8618	-0.712016	0.257663	-2.76336	0.00572089	0.0265867	1134
AT4TE04895	113.842	-0.712135	0.235204	-3.02774	0.00246392	0.0128055	843
AT2TE27585	82.0435	-0.712153	0.270229	-2.63537	0.00840453	0.0370124	553
AT2TE06785	125.542	-0.712205	0.230807	-3.08572	0.0020306	0.0108371	688
AT5TE49980	155.841	-0.712229	0.204619	-3.48075	0.00050001	0.00314399	1403
AT4TE06300	662.184	-0.712921	0.111131	-6.41516	1.40675e-10	2.2007e-09	1003
AT5TE68420	146.114	-0.713264	0.223044	-3.19787	0.00138447	0.00773522	1149
AT1TE44725	134.277	-0.713564	0.223649	-3.19055	0.00142	0.00790791	591
AT5TE80015	154.494	-0.713745	0.209638	-3.40466	0.000662457	0.00402328	1509
AT2TE04675	216.669	-0.713926	0.182667	-3.90835	9.29289e-05	0.000686982	1089
AT5TE70790	97.9054	-0.715412	0.258861	-2.76369	0.00571519	0.0265703	208
AT2TE27150	110.328	-0.715439	0.24447	-2.92649	0.0034281	0.0170575	1416
AT1TE98910	639.588	-0.715527	0.113053	-6.32915	2.46513e-10	3.77154e-09	2370
AT3TE69325	134.986	-0.715747	0.217597	-3.28933	0.00100427	0.00581402	974
AT2TE26560	104.697	-0.71585	0.242481	-2.95219	0.00315533	0.015879	510
AT3TE69155	227.908	-0.716158	0.181911	-3.93687	8.25515e-05	0.000617596	2473
AT2TE44620	182.589	-0.716594	0.192221	-3.72796	0.000193034	0.0013317	1112
AT5TE40050	178.141	-0.716762	0.199751	-3.58827	0.000332876	0.00217629	921
AT3TE58540	187.273	-0.716906	0.188432	-3.80458	0.000142043	0.00100697	502
AT4TE23560	384.301	-0.716989	0.142037	-5.04789	4.46715e-07	4.81627e-06	1607
AT5TE38440	112.615	-0.717603	0.235698	-3.04459	0.00232994	0.0122142	1654
AT5TE30560	292.222	-0.717921	0.172575	-4.16006	3.18167e-05	0.000257426	1026
AT2TE28490	118.834	-0.717998	0.23096	-3.10875	0.00187878	0.0101201	1131
AT1TE25210	77.6387	-0.718569	0.277743	-2.58717	0.00967674	0.0416512	704
AT5TE49810	175.785	-0.718575	0.197727	-3.63417	0.000278876	0.00185451	1115
AT1TE43830	86.1715	-0.719192	0.264429	-2.7198	0.00653222	0.0298212	724
AT3TE46275	180.459	-0.719782	0.193408	-3.72158	0.000197982	0.00136401	1360
AT2TE10280	97.0932	-0.719966	0.252051	-2.85643	0.00428439	0.020736	223
AT3TE65435	123.617	-0.720701	0.225384	-3.19765	0.0013855	0.00773991	1025
AT1TE53790	119.086	-0.720864	0.232419	-3.10157	0.00192499	0.0103352	1001
AT2TE09400	92.4757	-0.720917	0.256162	-2.8143	0.00488838	0.0232486	440
AT1TE46990	111.262	-0.721076	0.237942	-3.03046	0.00244179	0.0127082	1977
AT3TE64485	289.169	-0.721695	0.159312	-4.53007	5.89628e-06	5.38778e-05	3166
AT1TE19285	374.957	-0.721891	0.142871	-5.05275	4.35488e-07	4.69893e-06	1526
AT2TE46725	93.3566	-0.722024	0.270039	-2.67378	0.00750017	0.0335837	759
AT1TE93915	273.532	-0.722097	0.161532	-4.47029	7.81131e-06	7.01601e-05	1460
AT5TE01760	242.27	-0.722196	0.169089	-4.27109	1.94521e-05	0.000163	1016
AT1TE63460	126.159	-0.722221	0.227245	-3.17816	0.00148212	0.00820939	1024
AT5TE50550	218.93	-0.722403	0.176352	-4.09637	4.19687e-05	0.000331859	893
AT3TE66230	498.407	-0.722909	0.127429	-5.67302	1.40298e-08	1.80646e-07	1632
AT1TE47005	126.161	-0.72313	0.226387	-3.19422	0.00140208	0.00782082	1008
AT3TE12270	95.9574	-0.723241	0.267339	-2.70533	0.00682368	0.0309456	1508
AT5TE87925	245.631	-0.723454	0.170566	-4.2415	2.22035e-05	0.000183955	895
AT3TE63240	138.635	-0.72363	0.217642	-3.32486	0.000884614	0.00520339	449
AT5TE50290	224.538	-0.723934	0.174451	-4.14978	3.32801e-05	0.000268263	3544
AT1TE41465	154.459	-0.72455	0.212242	-3.41379	0.000640668	0.00390769	743
AT4TE25010	554.771	-0.725162	0.134153	-5.40549	6.46326e-08	7.72847e-07	1617
AT5TE33165	98.8878	-0.725167	0.251848	-2.87938	0.00398456	0.019489	2046
AT1TE51440	96.6027	-0.725292	0.252071	-2.87734	0.00401049	0.0196047	602
AT2TE22545	263.569	-0.725302	0.164217	-4.41673	1.00203e-05	8.82466e-05	1232
AT1TE20755	336.533	-0.725473	0.157085	-4.61835	3.86795e-06	3.61062e-05	1508
AT2TE33285	97.4621	-0.725498	0.253798	-2.85856	0.0042557	0.0206141	264
AT5TE74305	504.164	-0.725755	0.124598	-5.82476	5.71962e-09	7.66158e-08	2476
AT5TE38960	120.091	-0.726306	0.22961	-3.16322	0.00156034	0.00859745	715
AT3TE51440	223.291	-0.726716	0.177862	-4.08585	4.39157e-05	0.000345791	764
AT1TE41905	334.3	-0.726863	0.148936	-4.88036	1.05892e-06	1.07779e-05	3880
AT5TE39705	275.797	-0.727155	0.168354	-4.31921	1.56592e-05	0.000133337	1969
AT2TE06245	88.0632	-0.727478	0.266732	-2.72737	0.00638408	0.0292651	1520
AT2TE06395	164.084	-0.72753	0.206653	-3.52054	0.000430672	0.00274878	1249
AT5TE40040	196.915	-0.727679	0.188609	-3.85813	0.000114256	0.000825496	1183
AT3TE63600	97.4292	-0.727882	0.255251	-2.85163	0.00434956	0.0210019	723
AT3TE11070	144.433	-0.727924	0.212425	-3.42673	0.000610907	0.00375178	321
AT5TE31480	78.7629	-0.728477	0.276799	-2.63179	0.00849365	0.0373488	679
AT1TE57460	108.437	-0.728519	0.238891	-3.04959	0.00229155	0.0120329	724
AT1TE55100	291.367	-0.728564	0.15835	-4.60098	4.20499e-06	3.91191e-05	2554
AT5TE18540	71.734	-0.728626	0.287248	-2.53658	0.0111942	0.0470836	259
AT5TE49795	93.0197	-0.728907	0.265393	-2.74652	0.00602316	0.0278153	283
AT5TE39020	226.546	-0.729031	0.172825	-4.21831	2.46136e-05	0.000202495	3355
AT1TE95915	222.78	-0.729155	0.178023	-4.09584	4.20646e-05	0.000332553	1071
AT1TE00030	146.046	-0.730114	0.210606	-3.46673	0.000526835	0.00328952	311
AT3TE23625	129.716	-0.730244	0.222315	-3.28472	0.00102085	0.00590263	229
AT4TE22535	326.113	-0.730568	0.148208	-4.92933	8.25118e-07	8.5507e-06	2463
AT5TE31655	111.718	-0.730719	0.237733	-3.0737	0.00211421	0.0112091	574
AT5TE48895	234.573	-0.730871	0.171838	-4.25326	2.10677e-05	0.000175464	3177
AT4TE13955	96.822	-0.73102	0.258906	-2.8235	0.00475025	0.0226644	645
AT2TE23255	722.964	-0.73192	0.121599	-6.01913	1.75352e-09	2.47213e-08	1895
AT5TE86410	88.2401	-0.731946	0.261575	-2.79823	0.00513842	0.0242527	513
AT5TE61715	252.034	-0.732515	0.16619	-4.40771	1.04472e-05	9.17894e-05	1265
AT1TE30895	72.6329	-0.732683	0.288143	-2.54278	0.0109974	0.0463886	434
AT1TE71300	82.0633	-0.732873	0.271375	-2.7006	0.00692154	0.0313513	468
AT5TE52405	466.767	-0.733288	0.12943	-5.66554	1.46565e-08	1.88232e-07	882
AT1TE55985	367.338	-0.73353	0.141727	-5.17566	2.27107e-07	2.5405e-06	3481
AT2TE23905	524.17	-0.733578	0.129172	-5.67909	1.35414e-08	1.74839e-07	2717
AT5TE39580	103.218	-0.734086	0.245072	-2.99538	0.00274101	0.0140537	665
AT4TE24985	77.4033	-0.734342	0.279772	-2.62479	0.00867023	0.037975	573
AT1TE98915	149.736	-0.734604	0.214926	-3.41795	0.000630956	0.00385819	301
AT3TE63940	126.856	-0.734689	0.22814	-3.22035	0.00128035	0.00721028	493
AT5TE54045	114.246	-0.73505	0.233561	-3.14714	0.00164875	0.00902774	880
AT5TE48670	90.0007	-0.735065	0.263699	-2.78751	0.00531146	0.0249491	1490
AT5TE37850	239.697	-0.735381	0.169822	-4.3303	1.48908e-05	0.000127136	1758
AT5TE37980	68.7852	-0.735472	0.291358	-2.52429	0.0115933	0.0484027	332
AT3TE49965	116.644	-0.73561	0.237591	-3.09613	0.00196067	0.010502	1553
AT1TE63445	90.0502	-0.735971	0.263515	-2.7929	0.00522374	0.0245904	412
AT5TE52550	146.422	-0.736088	0.209632	-3.51134	0.000445861	0.0028378	496
AT2TE23875	114.526	-0.736317	0.241939	-3.0434	0.00233922	0.0122472	650
AT4TE10840	604.629	-0.736443	0.116341	-6.33005	2.45084e-10	3.75108e-09	4516
AT5TE36600	113.042	-0.737053	0.246077	-2.99521	0.00274256	0.0140582	1173
AT1TE27395	427.665	-0.737074	0.137863	-5.34643	8.9705e-08	1.05395e-06	1318
AT4TE28555	113.77	-0.737145	0.241565	-3.05154	0.0022767	0.0119672	891
AT5TE44535	148.471	-0.738095	0.219352	-3.36489	0.000765745	0.00458355	465
AT4TE68040	94.8276	-0.738917	0.255159	-2.8959	0.00378069	0.0185892	1196
AT2TE46740	141.904	-0.738933	0.212921	-3.47047	0.000519558	0.00324901	533
AT1TE53880	102.857	-0.739097	0.252269	-2.92979	0.00339189	0.0169024	601
AT5TE01245	369.721	-0.73932	0.142425	-5.19095	2.09228e-07	2.35396e-06	1220
AT2TE23395	362.63	-0.739429	0.142656	-5.18331	2.17981e-07	2.4444e-06	1635
AT1TE20195	301.951	-0.739533	0.168082	-4.39982	1.08339e-05	9.49841e-05	1489
AT5TE36260	338.605	-0.740023	0.148142	-4.99535	5.87292e-07	6.21937e-06	2866
AT4TE67755	97.2119	-0.740174	0.259736	-2.84972	0.00437578	0.0211186	875
AT2TE42170	77.7379	-0.740242	0.283897	-2.60743	0.00912235	0.0396569	618
AT3TE35830	71.2981	-0.740414	0.287439	-2.5759	0.00999804	0.0427878	680
AT1TE57300	132.765	-0.741613	0.221085	-3.35443	0.000795289	0.00473566	745
AT5TE31640	352.218	-0.741938	0.144526	-5.13359	2.84263e-07	3.13804e-06	2431
AT4TE42635	274.193	-0.741981	0.159954	-4.63871	3.50585e-06	3.30033e-05	1553
AT1TE09970	385.248	-0.74213	0.138949	-5.34102	9.24226e-08	1.08402e-06	1809
AT5TE49770	151.627	-0.74221	0.207791	-3.57191	0.000354386	0.00230483	1144
AT2TE21250	99.695	-0.742603	0.259557	-2.86105	0.00422247	0.0204772	1010
AT5TE08210	69.7768	-0.742902	0.29462	-2.52156	0.0116836	0.0487134	615
AT3TE48375	182.435	-0.743198	0.192041	-3.86999	0.000108839	0.000789271	642
AT1TE84245	298.216	-0.743246	0.160608	-4.6277	3.69754e-06	3.46571e-05	2023
AT3TE24145	474.292	-0.743598	0.141686	-5.24819	1.53598e-07	1.75644e-06	2183
AT2TE18305	147.768	-0.743798	0.209379	-3.55241	0.000381721	0.00246467	2045
AT1TE56365	421.051	-0.744203	0.134042	-5.552	2.82416e-08	3.52035e-07	1596
AT4TE21520	491.953	-0.744408	0.126888	-5.86667	4.44638e-09	6.02276e-08	2116
AT1TE51800	69.9818	-0.744455	0.295331	-2.52075	0.0117107	0.0488112	644
AT5TE52540	333.571	-0.744496	0.147283	-5.05486	4.30712e-07	4.65228e-06	876
AT3TE83280	622.897	-0.744533	0.118253	-6.29611	3.05199e-10	4.63491e-09	2871
AT4TE06290	137.037	-0.744767	0.224247	-3.32119	0.00089634	0.00526332	224
AT5TE60470	148.037	-0.745753	0.215015	-3.46838	0.000523609	0.00327186	655
AT1TE53895	136.968	-0.746061	0.218242	-3.4185	0.000629683	0.00385155	1116
AT1TE13690	98.2649	-0.746598	0.2509	-2.97568	0.0029234	0.0148573	443
AT3TE70580	311.015	-0.746697	0.155589	-4.79916	1.59333e-06	1.58102e-05	554
AT2TE35805	245.793	-0.746729	0.169388	-4.4084	1.04139e-05	9.15172e-05	1201
AT2TE28295	445.978	-0.746944	0.130743	-5.71308	1.10946e-08	1.44519e-07	408
AT1TE63240	193.865	-0.747143	0.189331	-3.94623	7.93909e-05	0.000595577	1737
AT1TE55310	88.8457	-0.747294	0.263503	-2.836	0.00456823	0.0219188	652
AT4TE46875	203.459	-0.747337	0.189268	-3.94857	7.86186e-05	0.000590537	1584
AT1TE71930	104.61	-0.747562	0.243517	-3.06985	0.00214167	0.0113357	664
AT1TE29420	103.164	-0.747844	0.249379	-2.99883	0.0027102	0.0139184	903
AT5TE49090	241.065	-0.747975	0.168337	-4.44331	8.85871e-06	7.8776e-05	695
AT1TE98920	447.214	-0.748023	0.136773	-5.46909	4.52349e-08	5.51649e-07	1862
AT5TE58740	102.273	-0.748091	0.246027	-3.04068	0.00236043	0.012341	331
AT3TE20790	134.626	-0.748112	0.21847	-3.42432	0.000616343	0.00378008	67
AT4TE30595	158.328	-0.748176	0.202847	-3.68837	0.000225698	0.00153185	622
AT1TE43375	66.0369	-0.748587	0.297777	-2.51392	0.0119398	0.0496335	206
AT1TE55510	88.2872	-0.748731	0.267953	-2.79426	0.0052018	0.024504	214
AT2TE11795	109.429	-0.749288	0.245081	-3.0573	0.00223338	0.0117635	1398
AT5TE57225	91.4048	-0.749691	0.261776	-2.86387	0.00418503	0.0203292	559
AT2TE11410	268.126	-0.74973	0.163375	-4.589	4.45369e-06	4.12832e-05	2970
AT2TE03965	92.1331	-0.750049	0.256927	-2.91931	0.00350813	0.0173968	1058
AT5TE55495	94.8301	-0.750169	0.276964	-2.70855	0.00675789	0.0306786	303
AT2TE26830	82.7476	-0.750288	0.272821	-2.75012	0.00595742	0.0275551	338
AT3TE68255	230.209	-0.750321	0.176623	-4.24814	2.15551e-05	0.00017898	2852
AT4TE46800	488.669	-0.750389	0.129008	-5.81662	6.00509e-09	8.02304e-08	2045
AT5TE48920	188.03	-0.750397	0.204222	-3.67441	0.000238399	0.00160876	1496
AT5TE34890	196.356	-0.750655	0.184544	-4.06762	4.7496e-05	0.000371917	1138
AT5TE64800	67.816	-0.751247	0.298898	-2.51339	0.0119576	0.0496845	494
AT5TE77565	384.483	-0.751248	0.140364	-5.35216	8.69122e-08	1.02377e-06	2046
AT5TE50515	362.423	-0.751681	0.143256	-5.24711	1.545e-07	1.76528e-06	2070
AT3TE45550	118.321	-0.751687	0.232041	-3.23946	0.00119758	0.00679632	518
AT3TE50230	123.007	-0.751918	0.226176	-3.32448	0.000885821	0.005209	953
AT1TE55805	126.224	-0.752122	0.224398	-3.35173	0.000803082	0.00477728	641
AT5TE52575	99.296	-0.752449	0.250743	-3.00088	0.00269204	0.0138424	1138
AT1TE36510	175.992	-0.752593	0.193206	-3.8953	9.8079e-05	0.000720262	1069
AT3TE47380	73.2762	-0.752722	0.289119	-2.6035	0.00922779	0.0400332	481
AT5TE36700	138.419	-0.752939	0.231608	-3.25091	0.00115035	0.00655633	639
AT3TE46045	106.749	-0.75314	0.252882	-2.97823	0.00289918	0.0147579	532
AT1TE32760	134.969	-0.753151	0.218589	-3.44551	0.000569977	0.00352304	395
AT2TE24745	107.264	-0.753239	0.240265	-3.13503	0.00171834	0.0093453	697
AT1TE43275	118.305	-0.75328	0.232434	-3.24083	0.00119182	0.00676734	554
AT5TE79680	249.018	-0.753314	0.172884	-4.35734	1.31652e-05	0.000113726	1050
AT2TE30005	179.148	-0.753333	0.192461	-3.91421	9.06997e-05	0.000672316	1143
AT5TE74485	130.603	-0.753727	0.237109	-3.17882	0.00147873	0.00819835	586
AT5TE60860	151.104	-0.754031	0.222437	-3.38986	0.000699288	0.00422388	1123
AT2TE23825	145.488	-0.754356	0.219241	-3.44076	0.000580086	0.00358122	630
AT2TE54840	105.009	-0.754482	0.247188	-3.05225	0.00227129	0.0119418	181
AT3TE47525	154.963	-0.754817	0.208793	-3.61514	0.000300184	0.00197892	1211
AT1TE55675	86.8335	-0.754909	0.265635	-2.8419	0.0044846	0.021583	1315
AT5TE74190	483.805	-0.755357	0.126816	-5.95632	2.57984e-09	3.5806e-08	2476
AT4TE25805	567.23	-0.755517	0.120244	-6.28322	3.31629e-10	5.01592e-09	2775
AT3TE63255	116.882	-0.75566	0.231352	-3.26627	0.00108973	0.00624547	654
AT4TE32165	88.4379	-0.755909	0.261965	-2.88554	0.00390746	0.0191461	1205
AT1TE10865	89.2973	-0.755976	0.263144	-2.87286	0.00406773	0.0198392	697
AT3TE63560	141.492	-0.756007	0.215208	-3.51292	0.000443215	0.00282183	575
AT1TE43230	81.3385	-0.756097	0.273079	-2.76878	0.00562662	0.0262257	300
AT3TE65545	100.38	-0.756238	0.250846	-3.01475	0.00257192	0.0133113	128
AT5TE57805	200.887	-0.756721	0.182772	-4.14026	3.46918e-05	0.000278605	1855
AT4TE19515	69.5189	-0.757466	0.291591	-2.5977	0.00938492	0.0405864	340
AT1TE03785	129.624	-0.757588	0.221401	-3.42179	0.000622099	0.00380903	1261
AT3TE47395	265.8	-0.757721	0.162559	-4.6612	3.14373e-06	2.97991e-05	1819
AT1TE50475	409.985	-0.757805	0.134767	-5.62308	1.87581e-08	2.38598e-07	977
AT3TE38920	142.377	-0.757953	0.216178	-3.50616	0.000454623	0.00288686	974
AT3TE30755	136.106	-0.758211	0.218708	-3.46677	0.000526748	0.00328952	924
AT2TE12495	196.367	-0.758503	0.188238	-4.02949	5.58975e-05	0.000432433	1681
AT3TE46050	103.826	-0.759238	0.253154	-2.99911	0.00270766	0.0139088	1299
AT3TE48710	141.646	-0.759492	0.213724	-3.55361	0.00037998	0.00245458	359
AT2TE27440	419.066	-0.759507	0.133525	-5.68814	1.28433e-08	1.66711e-07	1322
AT1TE57635	279.639	-0.759538	0.161738	-4.69609	2.65187e-06	2.54181e-05	1501
AT3TE39540	100.557	-0.759617	0.252604	-3.00714	0.00263714	0.0135992	164
AT3TE76015	159.277	-0.759731	0.206619	-3.67696	0.000236031	0.00159435	340
AT2TE24625	76.0872	-0.759771	0.288292	-2.63543	0.0084032	0.0370104	570
AT3TE67160	319.26	-0.759943	0.150317	-5.05561	4.29027e-07	4.63529e-06	3225
AT1TE44395	216.953	-0.760208	0.178079	-4.26894	1.964e-05	0.000164407	1691
AT2TE10605	163.203	-0.76046	0.205797	-3.69519	0.00021972	0.00149652	801
AT3TE46130	98.2766	-0.760879	0.254828	-2.98586	0.00282783	0.0144413	593
AT5TE69895	202.838	-0.761687	0.181632	-4.19357	2.74595e-05	0.00022456	1303
AT4TE23700	850.847	-0.761763	0.101811	-7.48216	7.31121e-14	1.4534e-12	2124
AT3TE50420	80.7789	-0.761905	0.279381	-2.72712	0.00638907	0.0292815	191
AT1TE67620	72.8869	-0.761979	0.288117	-2.64468	0.00817677	0.0361604	1610
AT3TE43530	176.922	-0.762545	0.198411	-3.84326	0.00012141	0.000872915	760
AT3TE49390	142.169	-0.762572	0.224943	-3.39007	0.000698745	0.00422122	491
AT5TE66775	115.793	-0.762662	0.235975	-3.23196	0.00122943	0.00695402	549
AT3TE33475	110.344	-0.763071	0.246018	-3.10168	0.00192423	0.0103338	1015
AT3TE84000	411.247	-0.764422	0.134618	-5.67847	1.35909e-08	1.75257e-07	3407
AT1TE41815	172.902	-0.764636	0.196063	-3.89994	9.62147e-05	0.000707745	655
AT2TE02335	268.436	-0.76506	0.162442	-4.70975	2.48018e-06	2.394e-05	2485
AT1TE60190	75.4171	-0.765819	0.287904	-2.65998	0.00781463	0.0347834	93
AT5TE68275	498.786	-0.766707	0.133225	-5.75499	8.66489e-09	1.14061e-07	875
AT4TE23690	382.301	-0.767745	0.140964	-5.44638	5.14064e-08	6.23397e-07	1000
AT5TE38550	98.5159	-0.767968	0.253301	-3.03183	0.00243074	0.0126603	904
AT3TE40655	220.364	-0.769178	0.177673	-4.32919	1.49662e-05	0.000127727	1373
AT1TE28170	85.055	-0.769735	0.268984	-2.86164	0.00421458	0.0204511	20
AT1TE38940	240.268	-0.76987	0.169485	-4.54242	5.56123e-06	5.0918e-05	756
AT1TE36550	136.032	-0.769885	0.219212	-3.51206	0.000444651	0.00283053	1007
AT2TE49350	131.949	-0.770031	0.221428	-3.47757	0.00050599	0.00317486	1074
AT5TE36415	128.828	-0.770227	0.223172	-3.45126	0.000557966	0.0034592	341
AT5TE36530	225.15	-0.770242	0.173501	-4.43941	9.02046e-06	8.00931e-05	2789
AT4TE28505	69.1199	-0.770253	0.296155	-2.60085	0.00929938	0.04028	464
AT1TE71705	105.065	-0.771007	0.24943	-3.09108	0.00199429	0.0106668	598
AT3TE47185	783.025	-0.77123	0.106165	-7.26446	3.74523e-13	7.15125e-12	5331
AT1TE41830	109.021	-0.77187	0.241457	-3.19672	0.00139001	0.00775983	323
AT5TE21970	258.943	-0.772396	0.164855	-4.68529	2.79564e-06	2.67276e-05	909
AT5TE67205	69.9842	-0.772645	0.293334	-2.63401	0.00843837	0.0371375	353
AT5TE49270	137.043	-0.772785	0.219132	-3.52658	0.000420969	0.00269187	1237
AT4TE30455	94.667	-0.773208	0.254689	-3.03589	0.00239824	0.0125164	635
AT5TE68990	363.572	-0.773251	0.145467	-5.31564	1.06281e-07	1.23844e-06	1324
AT4TE63090	235.439	-0.773443	0.181472	-4.26204	2.02567e-05	0.000169327	1076
AT2TE05455	117.891	-0.773471	0.232029	-3.3335	0.000857597	0.00506331	1425
AT3TE46760	94.0132	-0.774179	0.2639	-2.9336	0.00335052	0.0167404	1342
AT4TE84225	366.442	-0.774266	0.152146	-5.08896	3.60039e-07	3.9323e-06	1766
AT4TE17740	64.4538	-0.774552	0.300348	-2.57885	0.0099131	0.0424824	525
AT2TE18320	495.043	-0.774985	0.138431	-5.59836	2.16388e-08	2.73462e-07	3434
AT1TE38035	302.507	-0.775296	0.158041	-4.90566	9.31159e-07	9.58196e-06	2484
AT4TE06130	75.6084	-0.775351	0.282082	-2.74867	0.00598368	0.0276579	1349
AT1TE57640	258.582	-0.775695	0.168634	-4.59988	4.22729e-06	3.92998e-05	1406
AT5TE38165	126.974	-0.776073	0.23161	-3.35078	0.000805838	0.00479213	703
AT1TE86795	70.1312	-0.776301	0.292144	-2.65725	0.00787809	0.03503	559
AT1TE54720	167.486	-0.77658	0.197534	-3.93138	8.4459e-05	0.000631063	1082
AT5TE52235	70.1774	-0.777057	0.298234	-2.60553	0.00917327	0.0398387	713
AT5TE29690	96.5923	-0.777561	0.256206	-3.03491	0.00240611	0.0125505	994
AT1TE58195	253.187	-0.778126	0.166103	-4.6846	2.80509e-06	2.68055e-05	2115
AT1TE41490	137.364	-0.778476	0.219543	-3.5459	0.000391276	0.00251688	398
AT3TE61735	177.181	-0.778563	0.194895	-3.99477	6.4757e-05	0.000494733	821
AT2TE28110	187.74	-0.779068	0.189585	-4.10934	3.96784e-05	0.0003149	1079
AT2TE26625	107.082	-0.779079	0.245353	-3.17534	0.00149661	0.00828184	381
AT5TE18530	91.1146	-0.780106	0.262793	-2.96852	0.00299238	0.0151704	628
AT1TE55670	274.136	-0.780151	0.159521	-4.89058	1.00537e-06	1.02813e-05	3353
AT1TE26675	363.538	-0.780401	0.15473	-5.04362	4.56801e-07	4.91599e-06	1467
AT1TE55305	475.123	-0.780778	0.128745	-6.06455	1.3232e-09	1.88811e-08	782
AT1TE45575	83.0088	-0.780786	0.26899	-2.90266	0.00370008	0.0182321	822
AT5TE02710	426.603	-0.780831	0.140464	-5.55892	2.71445e-08	3.38977e-07	1251
AT2TE42855	369.338	-0.780994	0.143032	-5.46026	4.75427e-08	5.79105e-07	2387
AT3TE68390	65.5377	-0.78117	0.301725	-2.58901	0.00962511	0.0414507	89
AT1TE42935	68.6471	-0.78189	0.293394	-2.66499	0.00769911	0.0343063	749
AT4TE55465	158.603	-0.781995	0.213592	-3.66116	0.000251077	0.00168574	880
AT2TE23675	91.9028	-0.782092	0.261606	-2.98958	0.00279366	0.0142913	349
AT2TE29180	244.884	-0.782494	0.168734	-4.63744	3.5275e-06	3.31996e-05	2804
AT2TE49335	376.068	-0.782549	0.139772	-5.59877	2.1588e-08	2.72988e-07	2996
AT1TE49140	76.7046	-0.783147	0.279829	-2.79866	0.00513144	0.0242253	808
AT1TE54255	85.18	-0.783219	0.291402	-2.68776	0.00719337	0.0323931	305
AT1TE63450	71.9753	-0.783463	0.28997	-2.70188	0.00689491	0.031241	185
AT4TE09865	70.3812	-0.78377	0.290857	-2.6947	0.00704526	0.0317996	547
AT4TE26050	183.347	-0.783773	0.193469	-4.05115	5.09661e-05	0.000396897	1938
AT2TE10110	99.1255	-0.783891	0.251387	-3.11827	0.00181918	0.00983517	249
AT5TE38170	111.972	-0.784432	0.238069	-3.29497	0.000984308	0.00571699	716
AT3TE43990	142.727	-0.784877	0.221742	-3.53959	0.00040075	0.002575	1628
AT5TE07520	154.697	-0.78548	0.208797	-3.76194	0.0001686	0.00117577	1095
AT1TE66640	78.4242	-0.785563	0.282742	-2.77838	0.00546311	0.0255825	683
AT4TE28875	70.52	-0.785625	0.296732	-2.64759	0.00810667	0.0358967	393
AT3TE23630	204.449	-0.785751	0.186099	-4.22222	2.41905e-05	0.000199333	637
AT3TE69470	227.95	-0.786136	0.183231	-4.29041	1.78345e-05	0.000150642	1544
AT4TE10865	110.47	-0.786143	0.238182	-3.30059	0.000964802	0.00561084	656
AT5TE34810	533.392	-0.78629	0.125204	-6.28008	3.38399e-10	5.11267e-09	4813
AT4TE31485	137.99	-0.786316	0.222641	-3.53176	0.000412798	0.00264538	1252
AT3TE45325	121.837	-0.786776	0.231533	-3.39812	0.000678508	0.00410984	1179
AT5TE38025	152.291	-0.787082	0.207281	-3.79717	0.000146355	0.00103397	1919
AT5TE09455	445.947	-0.787205	0.130877	-6.01484	1.80062e-09	2.53419e-08	2431
AT2TE23340	114.55	-0.787241	0.233814	-3.36695	0.000760041	0.00455537	720
AT3TE66960	96.1372	-0.787716	0.254127	-3.0997	0.00193717	0.0103938	974
AT4TE27435	133.963	-0.787818	0.22196	-3.54937	0.000386157	0.00248901	1143
AT1TE44265	328.993	-0.787972	0.150842	-5.22383	1.75257e-07	1.98808e-06	2611
AT1TE54605	60.9213	-0.788446	0.31134	-2.53243	0.0113276	0.0475171	1043
AT2TE10295	105.165	-0.78897	0.24771	-3.18505	0.00144728	0.0080424	826
AT1TE20925	200.387	-0.789621	0.201662	-3.91557	9.01925e-05	0.00066916	1338
AT1TE27340	114.096	-0.790278	0.240242	-3.28951	0.0010036	0.005811	1819
AT5TE93215	188.682	-0.790297	0.189197	-4.17711	2.95231e-05	0.000240251	1285
AT3TE49920	123.78	-0.790364	0.233958	-3.37822	0.000729556	0.00438944	481
AT3TE63225	68.9319	-0.790574	0.293346	-2.69503	0.00703832	0.0317788	251
AT3TE89830	2450.86	-0.791079	0.0827793	-9.55648	1.21833e-21	3.90378e-20	4794
AT3TE63155	359.418	-0.791292	0.149314	-5.29952	1.16107e-07	1.34645e-06	1199
AT4TE01625	237.055	-0.791302	0.176491	-4.48353	7.34188e-06	6.62187e-05	610
AT2TE58720	179.457	-0.791525	0.203491	-3.88973	0.000100355	0.000735272	753
AT1TE79030	134.391	-0.791798	0.228531	-3.46473	0.000530756	0.00331199	843
AT1TE57380	106.276	-0.791981	0.254573	-3.11101	0.00186446	0.0100591	262
AT2TE04150	85.3193	-0.792334	0.27692	-2.86124	0.00421993	0.0204691	192
AT2TE27165	958.253	-0.792679	0.0972729	-8.14902	3.66874e-16	8.51621e-15	3433
AT1TE36715	158.42	-0.793081	0.206357	-3.84325	0.000121414	0.000872915	892
AT5TE96875	243.708	-0.793569	0.170668	-4.64979	3.32281e-06	3.14097e-05	1886
AT1TE42430	375.034	-0.79384	0.146091	-5.43386	5.51463e-08	6.66001e-07	2475
AT1TE78725	75.4587	-0.793861	0.284761	-2.78782	0.00530643	0.0249368	106
AT2TE77260	148.814	-0.79507	0.208861	-3.8067	0.000140834	0.000999425	901
AT5TE07950	412.506	-0.795209	0.143766	-5.53128	3.17911e-08	3.93062e-07	2441
AT4TE28365	206.472	-0.7962	0.194791	-4.08745	4.36143e-05	0.000343681	1572
AT1TE42930	487.283	-0.796228	0.131202	-6.06873	1.2893e-09	1.84166e-08	1043
AT5TE61785	84.3915	-0.796264	0.269067	-2.95935	0.00308288	0.0155601	1189
AT3TE48390	59.4406	-0.796347	0.313483	-2.54032	0.0110752	0.0466449	789
AT1TE37660	86.0565	-0.796806	0.265135	-3.00528	0.00265338	0.0136624	965
AT5TE73020	184.346	-0.797012	0.18961	-4.20343	2.62904e-05	0.00021535	1070
AT5TE31405	262.713	-0.797426	0.16519	-4.82733	1.38377e-06	1.38647e-05	639
AT5TE62750	416.506	-0.797551	0.133903	-5.95617	2.58218e-09	3.58264e-08	2139
AT1TE80035	812.043	-0.797762	0.111153	-7.17717	7.11679e-13	1.32806e-11	2245
AT5TE55655	327.229	-0.797861	0.150698	-5.29444	1.1938e-07	1.38263e-06	2375
[truncated: 708 more rows]
